# Supplementary material for: Rh(iii)-catalyzed [3 + 2] spiroannulation of 2,3-dihydro-1,4-benzoxazines with 4-hydroxy-2-alkynoates throughortho-C–H bond functionalization
Source: Royal Society of Chemistry journal article supplement (doi:10.1039/d3ob00786c), 2023-01-01
Supplement: d3ob00786c1.pdf [file d3ob00786c1.pdf]

## Supporting Information for

# Rh(III)-Catalyzed [3+2] Spiroannulation of 2,3-Dihydro-1,4-benzoxazines with 4-Hydroxy-2-alkynoates through *ortho*-C-H Bond Functionalization

Kommu Nagesh,<sup>a,c</sup>Jagadish Manda,<sup>a,c</sup> B. Sridhar,<sup>b</sup>and B. V. SubbaReddy,<sup>a,c\*</sup>

<sup>a</sup>Fluoro-Agrochemicals, <sup>b</sup>Laboratory of X-ray Crystallography, CSIR-Indian Institute of Chemical Technology, Hyderabad, 500007, India; <sup>c</sup>Academy of Scientific and Innovative Research (AcSIR), Ghaziabad, - 201002, India. E-mail: basireddy@iict.res.in;

### Table of Contents

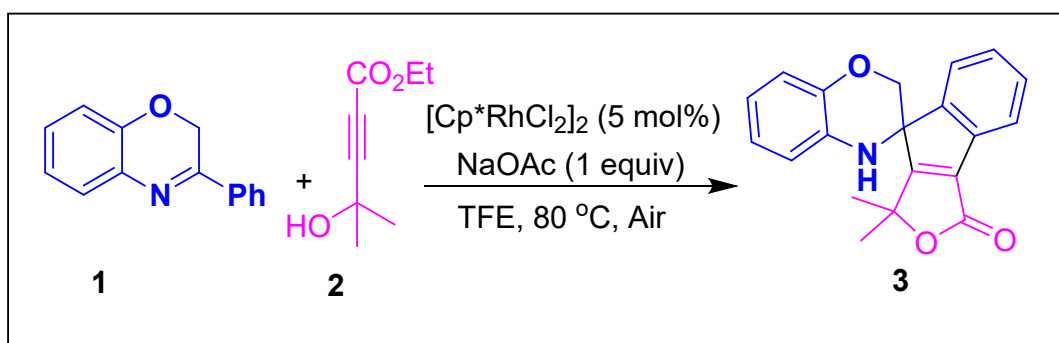

|                                                                  |         |
|------------------------------------------------------------------|---------|
| 1. General methods.....                                          | S2      |
| 2. Experimental procedures& optimization studies.....            | S2-S4   |
| 3. Characterization data of the products.....                    | S4-S17  |
| 4. Copies of <sup>1</sup> H and <sup>13</sup> C NMR spectra..... | S17-S55 |
| 5. Mechanistic experiments.....                                  | S55-58  |
| 6. X-ray crystallography.....                                    | S59     |

## 1. General methods

All reagents and solvents were purchased from commercial sources and used without purification. NMR spectra were recorded on 300, 400 or 500 MHz spectrometer for  $^1\text{H}$  NMR, 100 or 125 MHz for  $^{13}\text{C}$  NMR spectroscopy. Chemical shifts are reported relative to the residual signals of tetramethylsilane in  $\text{CDCl}_3$  for  $^1\text{H}$  and  $^{13}\text{C}$  NMR spectroscopy. Multiplicities are reported as follows: singlet (s), doublet (d), doublet of doublets (dd), doublet of triplets (dt), triplet (t), quartet (q), multiplet (m). HRMS are recorded using ORBITRAP and ESI mass spectrometer. Column chromatography was performed using silica gel (100–200 mesh) as a stationary phase. All reactions were monitored by TLC.

## 2. Experimental procedures & optimization studies

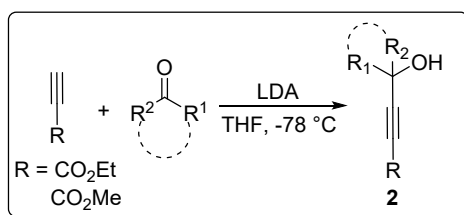

### Preparation of 4-hydroxy-2-alkynoates:

To a stirred solution of alkyl propiolate (4.5 mmol) in tetrahydrofuran (20 mL), lithium diisopropylamide (1.6 M in hexane, 4.5 mmol) was added drop wise by syringe at  $-78^\circ\text{C}$ . After stirring for 1 h, a solution of ketone (3 mmol) in THF (5 mL) was added and the mixture was stirred at the same temperature for 2 h. The solution was then allowed to room temperature, and quenched with sat.  $\text{NH}_4\text{Cl}$  and then extracted with ethyl acetate. The combined organic extracts were washed with brine, dried over  $\text{Na}_2\text{SO}_4$ , and concentrated under reduced pressure. The crude product was purified by flash chromatography on silica gel ( $\text{EtOAc} : n\text{-Hexanes}$ ) to give the desired 4-hydroxy-2-alkynoates **2**.

**Table S1. Optimization of metal catalyst**

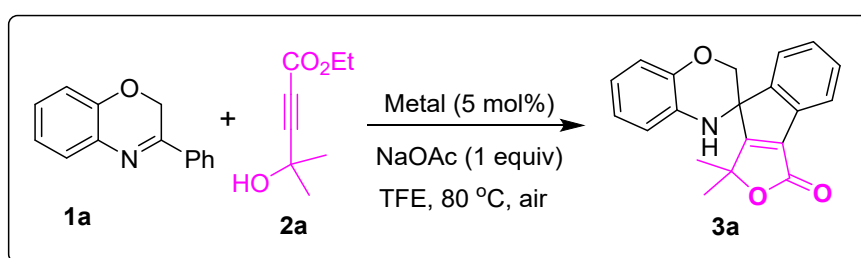

| Entry    | Metal Catalyst                                             | Yield of <b>3a</b> |
|----------|------------------------------------------------------------|--------------------|
| 1        | $\text{Pd}(\text{OAc})_2$ (5 mole%)                        | --                 |
| 2        | --                                                         | --                 |
| 3        | $[\text{RuCl}_2(\text{p-cymene})]_2$ (5 mole%)             | trace              |
| 4        | $[\text{Cp}^*\text{RhCl}_2]_2$ (3 mole%)                   | 60%                |
| <b>5</b> | <b><math>[\text{Cp}^*\text{RhCl}_2]_2</math></b> (5 mole%) | <b>85%</b>         |
| 6        | $[\text{Cp}^*\text{Co}(\text{CO})\text{I}_2]$ (5 mole%)    | --                 |
| 7        | $\text{MnBr}(\text{CO})_5$ (5 mole%)                       | --                 |
| 8        | $\text{Co}(\text{acac})_2$ (5 mole%)                       | --                 |

|   |                                                                  |     |
|---|------------------------------------------------------------------|-----|
| 9 | $[\text{Cp}^*\text{Rh}(\text{MeCN})_3](\text{SbF}_6)_2$ (5mole%) | 75% |
|---|------------------------------------------------------------------|-----|

<sup>a</sup>Reaction conditions: **1a** (0.5 mmol), **2a** (0.6 mmol), metal (5 mol %), NaOAc (1 equiv), TFE, 80 °C for 8h, air balloon.

**Table S2. Optimization of base**

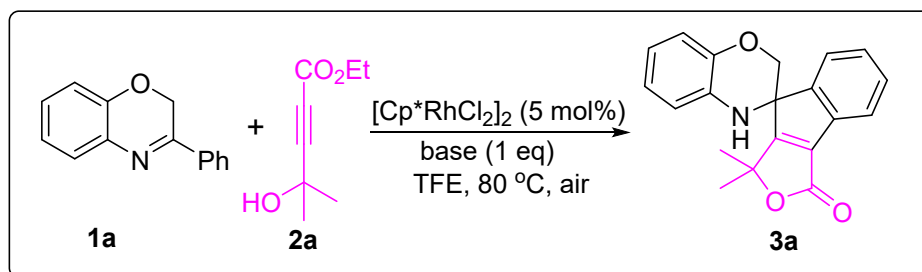

| Entry          | base                           | Yield of <b>3a</b> |
|----------------|--------------------------------|--------------------|
| 1              | KOAc                           | 72%                |
| 2              | CsOAc                          | 50%                |
| <b>3</b>       | <b>NaOAc</b>                   | <b>85%</b>         |
| 4              | K <sub>2</sub> CO <sub>3</sub> | 5%                 |
| 5              | NaOPiv                         | 62%                |
| 6              | NH <sub>4</sub> OAc            | ---                |
| 7              | ---                            | ---                |
| <sup>b</sup> 8 | NaOAc                          | 20%                |
| <sup>c</sup> 9 | NaOAc                          | 73%                |

<sup>a</sup>Reaction conditions: **1a** (0.5 mmol), **2a** (0.6 mmol),  $[\text{RhCp}^*\text{Cl}_2]_2$  (5 mol %), NaOAc (1 equiv), TFE, 80 °C for 8 h, air balloon. <sup>b</sup>0.5 equiv of base, <sup>c</sup>2 equiv of base.

**Table S3. Optimization of solvent**

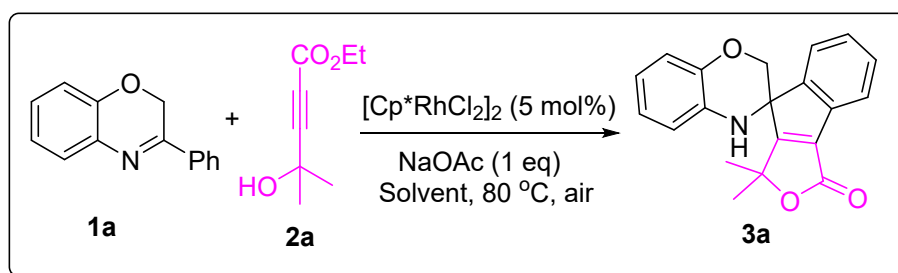

| Entry    | Solvent    | Yield of <b>3a</b> |
|----------|------------|--------------------|
| 1        | THF        | 22%                |
| 2        | MeCN       | 17%                |
| 3        | Toluene    | 13%                |
| 4        | EtOH       | 10%                |
| <b>5</b> | <b>TFE</b> | <b>85%</b>         |

|   |            |     |
|---|------------|-----|
| 6 | DCE        | 50% |
| 7 | 1,4-Dioxan | 5%  |

<sup>a</sup>Reaction conditions: **1a** (0.5 mmol), **2a** (0.6 mmol), [RhCp\*Cl<sub>2</sub>]<sub>2</sub> (5 mol %), NaOAc (1 equiv), solvent, 80 °C for 8 h, air balloon.

**Table S4. Optimization of oxidant**

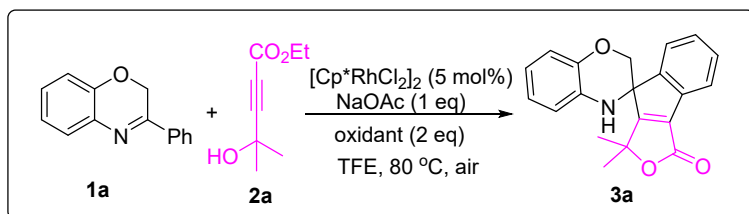

| Entry | Oxidant                                 | Yield of <b>3a</b> |
|-------|-----------------------------------------|--------------------|
| 1     | Cu(OAc) <sub>2</sub> ·H <sub>2</sub> O  | 65%                |
| 2     | AgOAc                                   | 68%                |
| 3     | Zn(OAc) <sub>2</sub> ·2H <sub>2</sub> O | 54%.               |
| 4     | PhI(OAc) <sub>2</sub>                   | n.r.               |

<sup>a</sup>Reaction conditions: **1a** (0.5 mmol), **2a** (0.6 mmol), [RhCp\*Cl<sub>2</sub>]<sub>2</sub> (5 mol %), NaOAc (1 equiv), oxidant (2 equiv), TFE, 80 °C for 8h, air balloon.

### General procedure for title compounds **3a** and Characteristic data

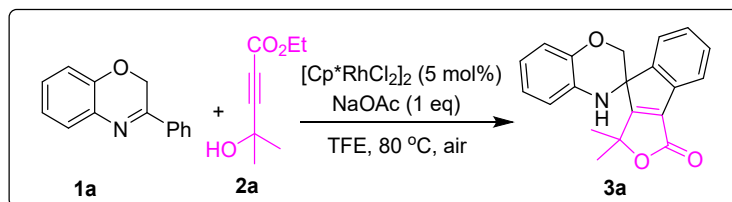

To a stirred solution of 3-aryl-2H-1,4-benzoxazine **1a** (100 mg, 0.5 mmol) and ethyl propiolate **2a** (90 mg, 0.6 mmol) in TFE were added [RhCp\*Cl<sub>2</sub>]<sub>2</sub> (5 mol %), sodium acetate (40 mg, 0.5 mmol) and then the reaction mixture was stirred at 80 °C (oil bath) for overnight under air balloon. After completion of the reaction (as monitored by TLC), TFE was evaporated, water was added, and the contents were extracted with ethyl acetate (2×10 mL). The organic layer was evaporated and the residue was purified by column chromatography (R<sub>f</sub> = 0.50) (SiO<sub>2</sub>, EtOAc:Hexane, 1:99) to give the product **3a** as a yellow solid in 81% (0.189 g) yield, mp 186-190 °C.

### 3. Characterization data of the products:

**1',1'-Dimethyl-2*H*,4*H*-spiro[benzo[*b*][1,4]oxazine-3,8'-indeno[1,2-*c*]furan]-3'(1'*H*)-one (3a)**

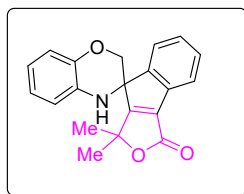

Yellow solid (0.189 g, 81%), mp 186-190 °C. <sup>1</sup>H NMR (500 MHz, CDCl<sub>3</sub>) δ 7.45-7.48 (m, 2H), 7.38-7.40 (m, 2H), 6.97 (dd, *J* = 7.9, 1.4 Hz, 1H), 6.85 (dd, *J* = 7.6, 1.5 Hz, 1H), 6.79 (dd, *J* = 7.7, 1.6 Hz, 1H), 6.65 (dd, *J* = 7.7, 1.5 Hz, 1H), 4.55 (d, *J* = 9.2 Hz, 1H), 4.07 (d, *J* = 9.6 Hz, 1H), 3.97 (s, 1H), 1.76 (s, 3H), 1.73 (s, 3H); <sup>13</sup>C NMR (125 MHz, CDCl<sub>3</sub>) δ 178.3, 165.6, 155.0, 143.2, 135.7, 132.1, 131.5, 130.6, 129.1, 125.3, 122.2, 122.1, 119.6, 116.8, 116.3, 82.8, 68.9, 60.8, 25.8, 25.7. HRMS (ESI) calcd for C<sub>20</sub>H<sub>18</sub>NO<sub>3</sub> [M+H]<sup>+</sup> 320.1281, found: 320.1289.

**1',1',5'-Trimethyl-2H,4H-spiro[benzo[b][1,4]oxazine-3,8'-indeno[1,2-c]furan]-3'(1'H)-one (3b)**

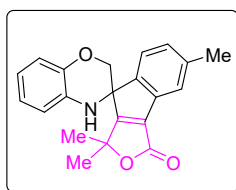

Yellow solid (0.199g, 75%), mp 235-240 °C. <sup>1</sup>H NMR (400 MHz, CDCl<sub>3</sub>) δ 7.34 (d, *J* = 8.3 Hz, 1H), 7.17 (d, *J* = 7.4 Hz, 2H), 7.00 – 6.92 (m, 1H), 6.84 (dd, *J* = 7.5, 1.3 Hz, 1H), 6.78 (dd, *J* = 7.6, 1.4 Hz, 1H), 6.64 (dd, *J* = 7.7, 1.4 Hz, 1H), 4.53 (d, *J* = 9.1 Hz, 1H), 4.04 (d, *J* = 9.5 Hz, 1H), 3.93 (s, 1H), 2.42 (s, 3H), 1.75 (s, 3H), 1.72 (s, 3H); <sup>13</sup>C NMR (100 MHz, CDCl<sub>3</sub>) δ 178.3, 165.7, 152.1, 143.2, 139.2, 136.0, 132.2, 131.7, 131.1, 125.0, 122.8, 122.1, 119.6, 116.8, 116.2, 82.7, 69.1, 60.5, 25.8, 25.8, 21.4; HRMS (ESI) calcd for C<sub>21</sub>H<sub>20</sub>NO<sub>3</sub> [M+H]<sup>+</sup> 334.1437, found: 334.1439.

**5'-Methoxy-1',1'-Dimethyl-2H,4H-spiro[benzo[b][1,4]oxazine-3,8'-indeno[1,2-c]furan]-3'(1'H)-one (3c)**

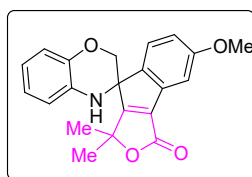

Yellow solid (0.178g, 82%), mp 238-240 °C. <sup>1</sup>H NMR (500 MHz, CDCl<sub>3</sub>) δ 7.36 (d, *J* = 8.3 Hz, 1H), 6.96 (d, *J* = 7.8 Hz, 1H), 6.91 – 6.82 (m, 3H), 6.78 (d, *J* = 7.4 Hz, 1H), 6.64 (d, *J* = 7.5 Hz, 1H), 4.51 (d, *J* = 9.1 Hz, 1H), 4.06 (d, *J* = 9.2 Hz, 1H), 3.92 (s, 1H), 3.84 (s, 3H), 1.75 (s, 3H), 1.72 (s, 3H); <sup>13</sup>C NMR (125 MHz, CDCl<sub>3</sub>) δ 177.7, 165.5, 160.5, 146.7, 143.2, 137.1, 133.4, 131.7, 125.9, 122.1, 119.6, 116.8, 116.3, 114.5, 108.9, 82.7, 69.3, 60.3, 55.8, 25.8, 25.7; HRMS (ESI) calcd for C<sub>21</sub>H<sub>20</sub>NO<sub>4</sub> [M+H]<sup>+</sup> 350.1386, found: 350.1394.

**1',1'-Dimethyl-5'-nitro-2H,4H-spiro[benzo[b][1,4]oxazine-3,8'-indeno[1,2-c]furan]-3'(1'H)-one (3d)**

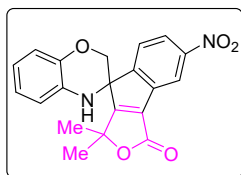

Yellow solid (0.188g,76%),mp 220-224°C;<sup>1</sup>H NMR (400 MHz, CDCl<sub>3</sub>) δ 8.42 (d, *J* = 2.0 Hz, 1H), 8.21 (dd, *J* = 8.3, 2.1 Hz, 1H), 7.54 (d, *J* = 8.3 Hz, 1H), 7.03 – 6.88 (m, 2H), 6.87 – 6.82 (m, 1H), 6.69 (dd, *J* = 7.7, 1.3 Hz, 1H), 4.48 (d, *J* = 8.5 Hz, 1H), 4.25 (dd, *J* = 8.7, 1.6 Hz, 1H), 4.07 (s, 1H), 1.69 (s, 3H), 1.38 (s, 3H);<sup>13</sup>C NMR (100 MHz, CDCl<sub>3</sub>) δ 183.6, 165.0,154.7,149.2,142.1,134.4,134.3,130.8,125.0,123.4,123.0,120.6,117.2,116.5, 115.8,87.2,69.2,63.8,25.3,24.8;HRMS(ESI)calcd for C<sub>20</sub>H<sub>17</sub>N<sub>2</sub>O<sub>5</sub>[M+H]<sup>+</sup>365.1132,found:365.1142.

**5'-Fluoro-1',1'-dimethyl-2H,4H-spiro[benzo[b][1,4]oxazine-3,8'-indeno[1,2-c]furan]-3'-(1'H)-one (3e)**

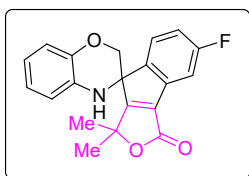

Yellow solid (0.203g,73%),mp 180-185°C.<sup>1</sup>H NMR (400 MHz, CDCl<sub>3</sub>) δ 7.45 – 7.39 (m, 1H), 7.05 (dd, *J* = 8.7, 5.5 Hz, 2H), 6.97 (dd, *J* = 7.8, 1.4 Hz, 1H), 6.86 (dd, *J* = 7.5, 1.6 Hz, 1H), 6.80 (dd, *J* = 7.6, 1.7 Hz, 1H), 6.66 (dd, *J* = 7.7, 1.6 Hz, 1H), 4.54 (d, *J* = 9.1 Hz, 1H), 4.03 (dd, *J* = 7.8, 1.1 Hz, 1H), 3.94 (s, 1H), 1.75 (s, 3H), 1.72 (s, 3H);<sup>19</sup>F NMR (376 MHz, CDCl<sub>3</sub>) δ -111.61 (d, *J* = 32.6 Hz),<sup>13</sup>C NMR (100 MHz, CDCl<sub>3</sub>) δ 176.8, 165.1(d, <sup>1</sup>J<sub>C-F</sub> = 251.7 Hz, A-F), 164.2, 143.1, 137.7, 133.7, 131.3, 126.6, 126.5(d, *J* = 9.3 Hz), 122.3, 119.9, 116.9, 116.8, 116.3, 109.7, 109.5(d, <sup>2</sup>J<sub>C-F</sub> = 24.2 Hz, A-F), 82.7, 68.9, 60.5, 25.8,25.7;HRMS (ESI) calcd for C<sub>20</sub>H<sub>17</sub>FNO<sub>3</sub>[M+H]<sup>+</sup>338.1187,found: 338.1196

**5'-Bromo-1',1'-Dimethyl-2H,4H-spiro[benzo[b][1,4]oxazine-3,8'-indeno[1,2-c]furan]-3'-(1'H)-one (3f)**

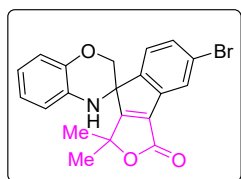

Yellow solid (0.153g,79%),mp 229-232 °C;<sup>1</sup>H NMR (500 MHz, CDCl<sub>3</sub>)δ 7.80 (s, 1H), 7.46 (dd, *J* = 8.0, 1.7 Hz, 1H), 7.25 (d, *J* = 8.0 Hz, 1H), 6.94 (d, *J* = 7.9 Hz, 1H), 6.88 (td, *J* = 7.6, 1.2 Hz, 1H), 6.81 (td, *J* = 7.8, 1.3 Hz, 1H), 6.65 (dd, *J* = 7.8, 1.1 Hz, 1H), 4.44 (d, *J* = 6.8 Hz, 1H), 4.17 (dd, *J* = 8.0, 1.8 Hz, 1H), 3.98 (s, 1H), 1.66 (s, 3H), 1.31 (s, 3H);<sup>13</sup>C NMR (125 MHz, CDCl<sub>3</sub>) δ 183.1, 165.6, 142.0, 134.7, 134.6, 131.4, 130.7, 125.6, 124.9, 123.9, 122.8, 120.1, 117.0,115.5, 87.2, 69.5, 63.5, 25.3,24.8;HRMS(ESI)calcd for C<sub>20</sub>H<sub>17</sub>BrNO<sub>3</sub>[M+H]<sup>+</sup>398.0386 , found:398.0392

**1',1'-Dimethyl-5'-phenyl-2*H*,4*H*-spiro[benzo[*b*][1,4]oxazine-3,8'-indeno[1,2-*c*]furan]-3'(*1'**H*)-one (3g)**

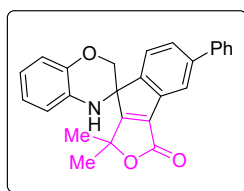

White solid (0.173g,80%),mp 330-335°C. <sup>1</sup>H NMR (500 MHz, CDCl<sub>3</sub>) δ 7.51 – 7.44 (m, 5H), 7.40 (t, *J* = 7.5 Hz, 2H), 7.33 (t, *J* = 7.3 Hz, 1H), 6.91 (dd, *J* = 7.9, 1.2 Hz, 1H), 6.78 (tt, *J* = 9.2, 4.6 Hz, 1H), 6.73 (td, *J* = 7.8, 1.2 Hz, 1H), 6.59 (dd, *J* = 7.7, 1.1 Hz, 1H), 4.52 (d, *J* = 9.5 Hz, 1H), 4.02 (d, *J* = 10.0 Hz, 1H), 1.72 (s, 3H), 1.69 (s, 3H); <sup>13</sup>C NMR (125 MHz, CDCl<sub>3</sub>) δ 178.1, 165.6, 153.8, 143.2, 142.8, 140.1, 136.3, 132.8, 131.5, 129.5, 129.0, 128.0, 127.3, 125.5, 122.3, 120.8, 119.7, 116.9, 116.3, 82.8, 68.9, 60.7, 25.9, 25.8; HRMS(ESI)calcd for C<sub>26</sub>H<sub>22</sub>NO<sub>3</sub>[M+H]<sup>+</sup>396.1594 ,found:396.1589.

**8',8'-Dimethyl-2*H*,4*H*-spiro[benzo[*b*][1,4]oxazine-3,7'-benzo[6,7]indeno[1,2-*c*]furan]-10'(*8'**H*)-one (3h)**

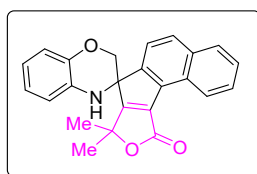

Brown solid (0.170g,0.84%),mp 222-227°C. <sup>1</sup>H NMR (400 MHz, CDCl<sub>3</sub>) δ 8.10 (d, *J* = 8.8 Hz, 1H), 7.91 (d, *J* = 7.5 Hz, 1H), 7.84 (d, *J* = 9.0 Hz, 2H), 7.56 (dd, *J* = 7.0, 1.5 Hz, 2H), 7.04 – 6.96 (m, 1H), 6.90 (d, *J* = 6.5 Hz, 1H), 6.88 – 6.79 (m, 1H), 6.68 (d, *J* = 7.6 Hz, 1H), 4.57 (d, *J* = 8.8 Hz, 1H), 4.27 (d, *J* = 8.6 Hz, 1H), 1.73 (d, *J* = 7.7 Hz, 3H), 1.36 (d, *J* = 7.6 Hz, 3H); <sup>13</sup>C NMR (100 MHz, CDCl<sub>3</sub>) δ 182.1, 166.2, 145.5, 142.2, 135.2, 134.1, 132.5, 131.8, 130.2, 128.6, 128.5, 127.1, 126.8, 124.1, 122.7, 120.6, 119.8, 117.0, 115.3, 87.1, 70.4, 63.1, 25.3, 25.0; HRMS (ESI)calcd for C<sub>24</sub>H<sub>20</sub>NO<sub>3</sub>[M+H]<sup>+</sup> 370.1437 ,found:370.1442.

**1',1',7-Trimethyl-2*H*,4*H*-spiro[benzo[*b*][1,4]oxazine-3,8'-indeno[1,2-*c*]furan]-3'(*1'**H*)-one (3i)**

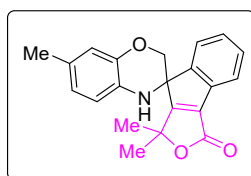

Brown solid (0.188g,76%),mp 225-230 °C. <sup>1</sup>H NMR (500 MHz, CDCl<sub>3</sub>) δ 7.65 (d, *J* = 7.4 Hz, 1H), 7.41 (dd, *J* = 7.4, 1.1 Hz, 1H), 7.37 (d, *J* = 7.2 Hz, 1H), 7.32 (dd, *J* = 7.5, 0.9 Hz, 1H), 6.75 (s, 1H), 6.68 (dd, *J* = 7.9, 1.1 Hz, 1H), 6.53 (d, *J* = 7.9 Hz, 1H), 4.46 (d, *J* = 7.2 Hz, 1H), 4.15 (dd, *J* = 7.2, 1.7 Hz, 1H), 3.86 (s, 1H), 2.28 (s, 3H), 1.66 (s, 3H), 1.31 (s, 3H); <sup>13</sup>C NMR (125 MHz, CDCl<sub>3</sub>) δ 182.1, 166.2, 148.3, 142.0, 135.4, 133.0, 129.8, 129.7, 129.1,

127.8, 124.3, 123.1, 121.6, 117.4, 115.3, 87.0, 70.0, 63.7, 25.4, 25.0, 20.7; **HRMS(ESI)** calcd for  $C_{21}H_{20}NO_3[M+H]$  348.1468, found: 348

**6-Methoxy-1',1'-dimethyl-2H,4H-spiro[benzo[b][1,4]oxazine-3,8'-indeno[1,2-c]furan]-3'(1'H)-one(3j)**

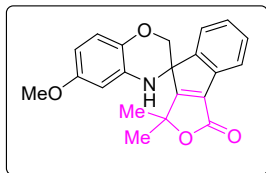

Yellow solid (0.183g, 80%), mp 224-230°C. **<sup>1</sup>H NMR (400 MHz, CDCl<sub>3</sub>)** δ 7.66 (d, *J* = 7.3 Hz, 1H), 7.37 (d, *J* = 7.4 Hz, 3H), 6.86 (d, *J* = 8.8 Hz, 1H), 6.35 (dd, *J* = 8.8, 2.6 Hz, 1H), 6.20 (d, *J* = 2.6 Hz, 1H), 4.42 (d, *J* = 8.2 Hz, 1H), 4.13 (d, *J* = 8.1 Hz, 1H), 3.95 (d, *J* = 9.7 Hz, 1H), 3.74 (d, *J* = 6.1 Hz, 3H), 1.68 (s, 3H), 1.36 (s, 3H), **<sup>13</sup>C NMR (100 MHz, CDCl<sub>3</sub>)** δ 182.0, 166.2, 155.2, 148.0, 136.2, 135.3, 133.0, 132.3, 129.8, 127.8, 124.2, 121.6, 117.3, 104.6, 101.0, 87.0, 69.8, 63.7, 55.6, 25.4, 25.1; **HRMS(ESI)** calcd for  $C_{21}H_{20}NO_4[M+H]^+$  350.1386, found: 350.1400.

**6-Bromo-1',1'-dimethyl-2H,4H-spiro[benzo[b][1,4]oxazine-3,8'-indeno[1,2-c]furan]-3'(1'H)-one (3k)**

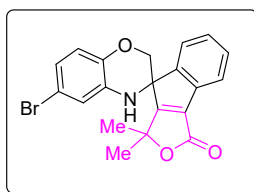

Yellow solid (0.191g, 72%), mp 240-245°C. **<sup>1</sup>H NMR (500 MHz, CDCl<sub>3</sub>)** δ 7.45 (dd, *J* = 8.3, 4.1 Hz, 2H), 7.42 – 7.38 (m, 2H), 6.87 (dd, *J* = 8.5, 2.2 Hz, 1H), 6.84 (d, *J* = 8.5 Hz, 1H), 6.77 (d, *J* = 2.1 Hz, 1H), 4.49 (d, *J* = 8.6 Hz, 1H), 4.07 (dd, *J* = 9.0, 1.3 Hz, 1H), 4.03 (s, 1H), 1.76 (s, 3H), 1.73 (s, 3H); **<sup>13</sup>C NMR (125 MHz, CDCl<sub>3</sub>)** δ 178.5, 165.6, 154.5, 142.1, 135.5, 133.2, 132.1, 130.7, 129.3, 125.2, 122.2, 121.9, 118.3, 118.2, 114.1, 83.0, 69.0, 60.4, 25.8, 25.7; **HRMS(ESI)** calcd for  $C_{20}H_{17}BrNO_3[M+H]^+$  398.0386, found: 398.0380.

**6,7-Dichloro-1',1'-dimethyl-2H,4H-spiro[benzo[b][1,4]oxazine-3,8'-indeno[1,2-c]furan]-3'(1'H)-one (3l)**

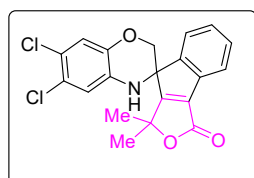

Yellow solid (0.178g, 78%), mp 280-285°C. **<sup>1</sup>H NMR (400 MHz, CDCl<sub>3</sub>)** δ 7.49 – 7.38 (m, 4H), 7.06 (s, 1H), 6.71 (s, 1H), 4.46 (d, *J* = 8.6 Hz, 1H), 4.11 (d, *J* = 6.3 Hz, 1H), 4.07 (s, 1H), 1.76 (s, 3H), 1.73 (s, 3H); **<sup>13</sup>C NMR (100 MHz, CDCl<sub>3</sub>)** δ 178.5, 165.4, 153.9, 142.1,



135.6, 132.1, 131.5, 130.7, 129.5, 125.2, 124.9, 122.3, 121.7, 118.3, 116.5, 82.9, 69.2, 60.3, 25.7, 25.7; **HRMS(ESI)** calcd for  $C_{20}H_{16}Cl_2NO_3[M+H]^+$  388.0501, found: 388.0488

**6,7-Dichloro-5'-methoxy-1',1'-dimethyl-2*H*,4*H*-spiro[benzo[*b*][1,4]oxazine-3,8'-indeno[1,2-*c*]furan]-3'(*1'H*)-one(3m)**

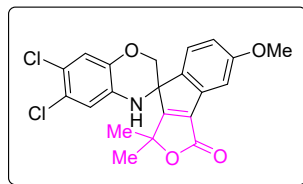

White solid (0.171g, 79%), mp 226-230°C. **<sup>1</sup>H NMR (400 MHz, CDCl<sub>3</sub>)** δ 7.32 (d, *J* = 9.0 Hz, 1H), 7.05 (s, 1H), 6.91 (s, 2H), 6.70 (s, 1H), 4.41 (d, *J* = 8.5 Hz, 1H), 4.08 (d, *J* = 8.6 Hz, 1H), 4.01 (s, 1H), 3.86 (s, 3H), 1.74 (s, 3H), 1.71 (s, 3H); **<sup>13</sup>C NMR (100 MHz, CDCl<sub>3</sub>)** δ 177.9, 165.4, 160.8, 145.4, 142.2, 137.0, 133.5, 131.7, 125.8, 124.8, 121.6, 118.3, 116.4, 114.5, 109.1, 82.8, 69.6, 59.8, 55.8, 25.7, 25.7; **HRMS(ESI)** calcd for  $C_{21}H_{18}Cl_2NO_4[M+H]^+$  418.0607 found: 418.0590.

**1'-Isobutyl-1'-methyl-2*H*,4*H*-spiro[benzo[*b*][1,4]oxazine-3,8'-indeno[1,2-*c*]furan]-3'(*1'H*)-one (3n)**

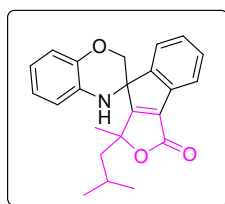

Yellow solid (0.222g, 78%), mp 170-175°C. **<sup>1</sup>H NMR (400 MHz, CDCl<sub>3</sub>)** δ 7.46 (m, 2H), 7.38 (m, 2H), 6.97 (d, *J* = 7.8 Hz, 1H), 6.86 (t, *J* = 7.0 Hz, 1H), 6.79 (t, *J* = 7.0 Hz, 1H), 6.67 (d, *J* = 6.7 Hz, 1H), 4.58 (d, *J* = 9.5 Hz, 1H), 4.03 (d, *J* = 9.0 Hz, 1H), 3.92 (s, 1H), 2.10 (dd, *J* = 10.0, 5.1 Hz, 1H), 1.81 (ddd, *J* = 10.5, 12.5, 5.5 Hz, 2H), 1.69 (s, 3H), 0.98 (d, *J* = 6.5 Hz, 3H), 0.88 (d, *J* = 6.4 Hz, 3H); **<sup>13</sup>C NMR (100 MHz, CDCl<sub>3</sub>)** δ 177.9, 165.9, 155.0, 143.1, 136.1, 132.4, 131.5, 130.5, 129.1, 125.3, 122.2, 122.2, 119.6, 116.9, 116.3, 85.5, 68.8, 60.8, 46.8, 25.4, 24.4, 24.3, 24.0; **HRMS(ESI)** calcd for  $C_{23}H_{24}NO_3[M+H]^+$  362.1750, found: 362.1762.

**1'-Methyl-1'-propyl-2*H*,4*H*-spiro[benzo[*b*][1,4]oxazine-3,8'-indeno[1,2-*c*]furan]-3'(*1'H*)-one (3o)**

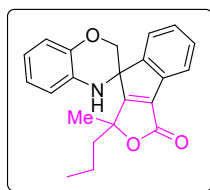

Yellow solid (0.240g, 69%), mp 186-190 °C. **<sup>1</sup>H NMR (400 MHz, CDCl<sub>3</sub>)** δ 7.41 (dd, *J* = 8.6, 7.1 Hz, 4H), 6.97 (d, *J* = 7.3 Hz, 1H), 6.86 (d, *J* = 6.9 Hz, 1H), 6.79 (d, *J* = 7.0 Hz, 1H), 6.66

(d,  $J = 7.6$  Hz, 1H), 4.57 (d,  $J = 9.1$  Hz, 1H), 4.04 (d,  $J = 9.2$  Hz, 1H), 3.92 (s, 1H), 2.15 – 2.04 (m, 1H), 2.00 – 1.86 (m, 1H), 1.70 (s, 3H), 1.26 (dd,  $J = 9.8, 5.9$  Hz, 2H), 0.93 (t,  $J = 7.3$  Hz, 3H);  $^{13}\text{C}$  NMR (100 MHz,  $\text{CDCl}_3$ )  $\delta$  177.5, 165.9, 155.1, 143.1, 136.3, 132.3, 131.5, 130.6, 129.0, 125.3, 122.2, 119.6, 116.9, 116.3, 85.4, 68.8, 60.8, 50.6, 40.5, 24.6, 17.2, 14.0; HRMS(ESI) calcd for  $\text{C}_{21}\text{H}_{20}\text{NO}_3[\text{M}+\text{H}]^+$  348.1468, found: 348.1476.

**1'-Cyclopropyl-1'-methyl-2*H*,4*H*-spiro[benzo[*b*][1,4]oxazine-3,8'-indeno[1,2-*c*]furan]-3'(1'*H*)-one(3q)**

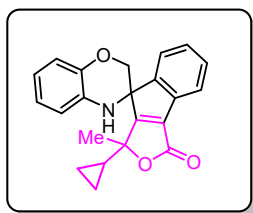

White solid (0.180 g, 79%), mp 180-183 °C.  $^1\text{H}$  NMR (400 MHz,  $\text{CDCl}_3$ )  $\delta$  7.49 – 7.41 (m, 3H), 7.40 - 7.34 (m, 1H), 6.97 (dd,  $J = 7.9, 1.4$  Hz, 1H), 6.86 (td,  $J = 7.5, 1.5$  Hz, 1H), 6.79 (td,  $J = 7.6, 1.6$  Hz, 1H), 6.69 - 6.63 (m, 1H), 4.56 (dd,  $J = 9.9, 5.0$  Hz, 1H), 4.05 - 4.00 (m, 1H), 3.96 (s, 1H), 1.72 (s, 3H), 1.37 (ddd,  $J = 10.0, 7.6, 5.9$  Hz, 1H), 0.75 - 0.62 (m, 2H), 0.58 - 0.47 (m, 2H);  $^{13}\text{C}$  NMR (100 MHz,  $\text{CDCl}_3$ )  $\delta$  175.7, 163.5, 152.9, 140.9, 133.3, 130.0, 129.3, 128.3, 126.8, 123.1, 120.3, 120.0, 117.3, 114.6, 114.1, 81.7, 66.6, 58.5, 21.2, 16.3, 0.0, -0.7. HRMS (ESI) calcd for  $\text{C}_{22}\text{H}_{19}\text{NO}_3[\text{M}+\text{H}]^+$  346.1461, found: 346.1469.

**1'-Cyclobutyl-1'-methyl-2*H*,4*H*-spiro[benzo[*b*][1,4]oxazine-3,8'-indeno[1,2-*c*]furan]-3'(1'*H*)-one(3r)**

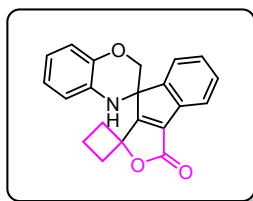

White solid (0.186 g, 80 %), mp 189-192 °C.  $^1\text{H}$  NMR (500 MHz,  $\text{CDCl}_3$ )  $\delta$  7.56 (d,  $J = 7.4$  Hz, 1H), 7.32 (ddd,  $J = 7.6, 5.9, 2.2$  Hz, 2H), 7.24 (td,  $J = 7.6, 1.1$  Hz, 1H), 6.93 (dd,  $J = 8.0, 1.4$  Hz, 1H), 6.84 (td,  $J = 7.6, 1.4$  Hz, 1H), 6.76 - 6.72 (m, 1H), 6.61 (dd,  $J = 7.8, 1.5$  Hz, 1H), 4.38 (d,  $J = 10.9$  Hz, 1H), 4.21 (d,  $J = 9.0$  Hz, 1H), 2.98 - 2.82 (m, 1H), 2.53 (dddd,  $J = 9.3, 6.6, 4.2, 1.8$  Hz, 1H), 2.46 - 2.35 (m, 1H), 2.35 - 2.21 (m, 1H), 1.88 (dtt,  $J = 10.0, 10.1, 6.5$  Hz, 1H), 1.48 – 1.34 (m, 1H);  $^{13}\text{C}$  NMR (126 MHz,  $\text{CDCl}_3$ )  $\delta$  177.1, 166.0, 148.7, 142.7, 135.9, 132.6, 131.7, 129.8, 127.9, 124.2, 122.8, 121.7, 119.9, 117.2, 115.4, 88.5, 69.9, 63.85, 31.8, 31.6, 13.5. HRMS (ESI) calcd for  $\text{C}_{21}\text{H}_{17}\text{NO}_3[\text{M}+\text{H}]^+$  332.1286, found: 332.1291.

**2*H*,3'*H*,4*H*-Dispiro[benzo[*b*][1,4]oxazine-3,8'-indeno[1,2-*c*]furan-1',1''-cyclopentan]-3'-one (5a)**

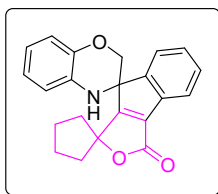

Yellow solid (0.203g, 83%), mp 235-239 °C.  $^1\text{H NMR}$  (400 MHz,  $\text{CDCl}_3$ )  $\delta$  7.48 -7.44 (m, 1H), 7.43 -7.33 (m, 3H), 6.97 (dd,  $J = 7.8, 1.4$  Hz, 1H), 6.85 (dd,  $J = 7.5, 1.5$  Hz, 1H), 6.78 (dd,  $J = 7.6, 1.6$  Hz, 1H), 6.65 (dd,  $J = 7.7, 1.6$  Hz, 1H), 4.58 (d,  $J = 8.5$  Hz, 1H), 4.06 (dd,  $J = 8.6, 1.1$  Hz, 1H), 3.98 (s, 1H), 2.31 -2.20 (m, 2H), 2.19 -2.08 (m, 4H), 2.03 -1.93 (m, 2H);  $^{13}\text{C NMR}$  (100 MHz,  $\text{CDCl}_3$ )  $\delta$  175.8, 165.9, 155.2, 136.2, 132.2, 131.6, 130.5, 129.0, 125.3, 122.2, 121.9, 119.6, 116.8, 116.3, 92.7, 68.8, 60.8, 37.7, 37.7, 29.7, 25.2, 25.2; HRMS (ESI) calcd for  $\text{C}_{22}\text{H}_{20}\text{NO}_3$   $[\text{M}+\text{H}]^+$  346.1437, found: 346.1445.

**5'-Methyl-2H,3'H,4H-dispiro[benzo[b][1,4]oxazine-3,8'-indeno[1,2-c]furan-1',1''-cyclopentan]-3'-one (5b)**

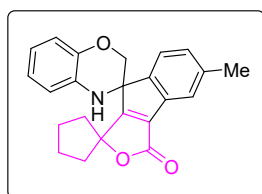

Yellow solid (0.221g, 73%), mp 134-140 °C.  $^1\text{H NMR}$  (500 MHz,  $\text{CDCl}_3$ )  $\delta$  7.27 (d,  $J = 7.8$  Hz, 1H), 7.12 - 7.06 (m, 2H), 6.89 (dd,  $J = 7.9, 1.5$  Hz, 1H), 6.77 (td,  $J = 7.6, 1.5$  Hz, 1H), 6.71 (td,  $J = 7.7, 1.5$  Hz, 1H), 6.57 (dd,  $J = 7.7, 1.5$  Hz, 1H), 4.48 (d,  $J = 9.5$  Hz, 1H), 3.97 (d,  $J = 9.0$  Hz, 1H), 2.34 (s, 3H), 2.17 (td,  $J = 9.8, 6.5$  Hz, 2H), 2.09 - 2.01 (m, 4H), 1.93 (t,  $J = 10.0$  Hz, 2H);  $^{13}\text{C NMR}$  (100 MHz,  $\text{CDCl}_3$ )  $\delta$  175.8, 165.9, 152.3, 143.2, 139.1, 136.5, 132.5, 131.7, 131.1, 125.0, 122.6, 122.1, 119.5, 116.8, 116.3, 92.7, 69.0, 60.5, 37.7, 37.7, 25.2, 25.2, 21.4; HRMS (ESI) calcd for  $\text{C}_{23}\text{H}_{22}\text{NO}_3$   $[\text{M}+\text{H}]^+$  360.1594, found: 360.1601.

**5'-Methoxy-2H,3'H,4H-Dispiro[benzo[b][1,4]oxazine-3,8'-indeno[1,2-c]furan-1',1''-cyclopentan]-3'-one (5c)**

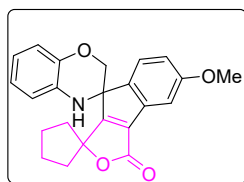

Yellow solid (0.191g, 82%), mp 219-225°C.  $^1\text{H NMR}$  (400 MHz,  $\text{CDCl}_3$ )  $\delta$  7.40 - 7.33 (m, 1H), 6.96 (dd,  $J = 5.8, 4.3$  Hz, 1H), 6.89 - 6.80 (m, 3H), 6.77 (dd,  $J = 7.6, 1.6$  Hz, 1H), 6.63 (dd,  $J = 7.7, 1.6$  Hz, 1H), 4.53 (d,  $J = 8.4$  Hz, 1H), 4.03 (d,  $J = 8.6$  Hz, 1H), 3.92 (d,  $J = 9.1$  Hz, 1H), 3.83 (s, 3H), 2.26 - 2.18 (m, 2H), 2.18 - 2.07 (m, 4H), 2.02 -1.94 (m, 2H);  $^{13}\text{C NMR}$  (100 MHz,  $\text{CDCl}_3$ )  $\delta$  175.3, 160.4, 146.9, 143.2, 133.6, 131.8, 125.9, 122.1, 119.5, 116.8, 116.3, 114.4, 108.8, 92.6, 69.2, 60.3, 55.8, 37.7, 37.6, 25.2, 25.2; HRMS (ESI) calcd for  $\text{C}_{23}\text{H}_{22}\text{NO}_4$   $[\text{M}+\text{H}]^+$  376.1543, found: 376.1557.

**5'-Bromo-2H,3'H,4H-Dispiro[benzo[b][1,4]oxazine-3,8'-indeno[1,2-c]furan-1',1''-cyclopentan]-3'-one (5d)**

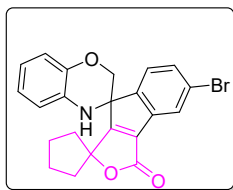

Yellow solid (0.193g,76%),mp 190-196°C .<sup>1</sup>H NMR (400 MHz, CDCl<sub>3</sub>) δ 7.79 (s, 1H), 7.45 (dd, *J* = 8.0, 1.7 Hz, 1H), 7.25 (d, *J* = 5.7 Hz, 1H), 6.94 – 6.85 (m, 2H), 6.78 (dd, *J* = 7.8, 1.3 Hz, 1H), 6.63 (dd, *J* = 7.8, 1.2 Hz, 1H), 4.43 (d, *J* = 8.0 Hz, 1H), 4.19 (dd, *J* = 8.5, 1.6 Hz, 1H), 4.00 (s, 1H), 2.57 – 2.43 (m, 1H), 1.91 (dd, *J* = 9.1, 6.3 Hz, 2H), 1.77 (dd, *J* = 9.3, 10.0 Hz, 3H), 1.69 – 1.62 (m, 2H);<sup>13</sup>C NMR (100 MHz, CDCl<sub>3</sub>) δ 180.3, 147.2, 142.1, 135.5, 134.7, 131.2, 130.6, 125.6, 124.7, 123.9, 122.8, 120.1, 117.1, 115.4, 96.9, 69.6, 63.5, 36.5, 25.0, 24.8;HRMS(ESI) calcd for C<sub>22</sub>H<sub>19</sub>Br NO<sub>3</sub>[M+H]<sup>+</sup>424.0542,found:424.0541.

**2H,3'H,4H-Dispiro[benzo[b][1,4]oxazine-3,8'-indeno[1,2-c]furan-1',1''-cyclohexan]-3'-one (5e)**

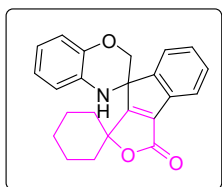

Yellow solid (0.202 g, 85%), mp 224-226 °C .<sup>1</sup>H NMR (400 MHz, CDCl<sub>3</sub>) δ 7.47 -7.39 (m, 1H), 7.36 (dd, *J* = 8.9, 6.8, Hz, 1H), 7.63 – 6.17 (m, 3H), 6.97 (dd, *J* = 7.9, 1.4 Hz, 1H), 6.82 (dd, *J* = 8.5, 7.5, Hz, 1H), 6.65 (dd, *J* = 7.7, 1.6 Hz, 1H), 4.60 (d, *J* = 8.5 Hz, 1H), 4.01 (dd, *J* = 8.6, 1.3 Hz, 1H), 3.96 (s, 1H), 2.04 – 1.75 (m, 10H);<sup>13</sup>CNMR (100 MHz, CDCl<sub>3</sub>) δ 178.5, 166.0, 155.3, 143.1, 135.4, 132.2, 131.5, 130.5, 128.9, 125.3, 122.3, 122.2, 119.6, 116.8, 116.3, 84.7, 68.8, 60.7, 34.8, 34.8, 24.6, 21.7, 21.7;HRMS (ESI)calcd for C<sub>23</sub>H<sub>22</sub>NO<sub>3</sub> [M+H]<sup>+</sup> 360.1594 ,found:360.1604.

**5'-Methyl-2H,3'H,4H-dispiro[benzo[b][1,4]oxazine-3,8'-indeno[1,2-c]furan-1',1''-cyclohexan]-3'-one (5f)**

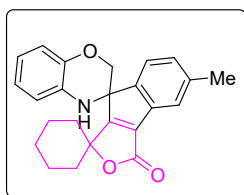

Yellow solid (0.220g,76%),mp 236-240 °C.<sup>1</sup>H NMR (400 MHz, CDCl<sub>3</sub>) δ 7.32 (d, *J* = 7.8 Hz, 1H), 7.22 (s, 1H), 7.15 (d, *J* = 7.8 Hz, 1H), 6.95 (dd, *J* = 7.8, 1.2 Hz, 1H), 6.83 (dd, *J* = 7.5, 1.5 Hz, 1H), 6.77 (dd, *J* = 7.6, 1.5 Hz, 1H), 6.63 (dd, *J* = 7.7, 1.5 Hz, 1H), 4.56 (d, *J* = 8.5 Hz, 1H), 3.99 (dd, *J* = 8.6, 0.9 Hz, 1H), 3.93 (s, 1H), 2.41 (s, 3H), 2.04 – 1.77 (m, 10H);<sup>13</sup>C NMR (100 MHz, CDCl<sub>3</sub>) δ 178.5, 166.1, 152.4, 143.2, 139.1, 135.6, 132.4, 131.7, 131.1, 125.0, 123.0, 122.1, 119.5, 116.8, 116.3, 69.0, 60.4, 34.8, 34.8, 24.6, 21.7, 21.7, 21.4;HRMS(ESI)calcd for C<sub>24</sub>H<sub>24</sub>NO<sub>3</sub> [M+H]<sup>+</sup>374.1750 , found:374.1755.

**5'-Methoxy-2*H*,3'*H*,4*H*-Dispiro[benzo[*b*][1,4]oxazine-3,8'-indeno[1,2-*c*]furan-1',1''-cyclohexan]-3'-one (5g)**

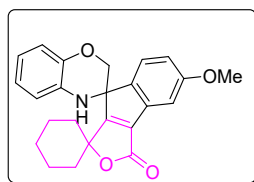

Yellow solid (0.193g,84%), mp 228-231 °C. <sup>1</sup>H NMR (400 MHz, CDCl<sub>3</sub>) δ 7.35 (d, *J* = 8.4 Hz, 1H), 6.98 – 6.91 (m, 2H), 6.87 – 6.81 (m, 2H), 6.77 (td, *J* = 7.6, 1.6 Hz, 1H), 6.63 (dd, *J* = 7.7, 1.6 Hz, 1H), 4.55 (d, *J* = 9.4 Hz, 1H), 4.00 (d, *J* = 9.0 Hz, 1H), 3.84 (s, 3H), 2.01 – 1.74 (m, 10H); <sup>13</sup>C NMR (100 MHz, CDCl<sub>3</sub>) δ 177.9, 165.9, 160.4, 147.1, 143.2, 136.7, 133.6, 131.7, 125.9, 122.1, 119.5, 116.8, 116.3, 114.4, 109.1, 84.6, 69.2, 60.2, 55.8, 34.8, 34.7, 24.6, 21.7, 21.7; HRMS(ESI) calcd for C<sub>24</sub>H<sub>24</sub>NO<sub>4</sub>[M+H]<sup>+</sup>390.1699 found:390.1707.

**5'-Bromo-2*H*,3'*H*,4*H*-Dispiro[benzo[*b*][1,4]oxazine-3,8'-indeno[1,2-*c*]furan-1',1''-cyclohexan]-3'-one (5h)**

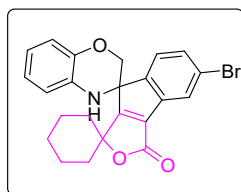

Yellow solid (0.187g,81%),mp 266-270°C. <sup>1</sup>H NMR (500 MHz, CDCl<sub>3</sub>) δ 7.53 (d, *J* = 1.7 Hz, 1H), 7.46 (dd, *J* = 8.1, 1.7 Hz, 1H), 7.31 (d, *J* = 8.1 Hz, 1H), 6.96 (dd, *J* = 7.9, 1.2 Hz, 1H), 6.85 (dd, *J* = 7.6, 1.4 Hz, 1H), 6.79 (dd, *J* = 7.7, 1.5 Hz, 1H), 6.65 (dd, *J* = 7.8, 1.4 Hz, 1H), 4.58 (d, *J* = 8.5 Hz, 1H), 3.97 (d, *J* = 8.6 Hz, 1H), 3.95 (s, 1H), 2.05-1.89(m, 10H); <sup>13</sup>C NMR (125 MHz, CDCl<sub>3</sub>) δ 177.0, 165.5, 154.0, 142.9, 136.7, 134.0, 133.0, 131.2, 126.7, 125.3, 122.8, 122.4, 119.8, 116.9, 116.4, 84.7, 68.5, 60.6, 34.8, 34.7, 24.5, 21.7; HRMS(ESI) calcd for C<sub>23</sub>H<sub>21</sub>Br NO<sub>3</sub>[M+H]<sup>+</sup>438.0699 ,found:438.0692.

**7'-Methyl-2*H*,3'*H*,4*H*-dispiro[benzo[*b*][1,4]oxazine-3,8'-indeno[1,2-*c*]furan-1',1''-cyclohexan]-3'-one (5i)**

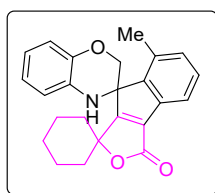

Yellow solid (0.215g,78%),mp 190-196 °C. <sup>1</sup>H NMR (400 MHz, CDCl<sub>3</sub>) δ 7.33 (d, *J* = 7.5 Hz, 1H), 7.23 (dd, *J* = 8.2, 8.1 Hz, 2H), 6.97 (d, *J* = 7.7 Hz, 1H), 6.85 (d, *J* = 7.4 Hz, 1H), 6.77 (d, *J* = 7.2 Hz, 1H), 6.65 (d, *J* = 7.5 Hz, 1H), 4.65 (d, *J* = 8.7 Hz, 1H), 4.07 (d, *J* = 8.6 Hz, 1H), 3.87 (s, 1H), 2.52 (s, 3H), 2.03 – 1.72 (m, 10H); <sup>13</sup>C NMR (100 MHz, CDCl<sub>3</sub>) δ 175.7, 165.8, 148.3, 143.6, 139.4, 137.4, 133.8, 132.9, 131.8, 129.4, 122.0, 120.1, 119.4, 117.0, 115.4, 83.9, 68.4, 63.4,34.7,24.6,21.7,17.8; HRMS (ESI) calcd for C<sub>24</sub>H<sub>24</sub>NO<sub>3</sub>[M+H]<sup>+</sup>374.1750,found: 374.1738.

**5'-Fluoro-2*H*,3'*H*,4*H*-dispiro[benzo[*b*][1,4]oxazine-3,8'-indeno[1,2-*c*]furan-1',1''-cyclohexan]-3'-one (5j)**

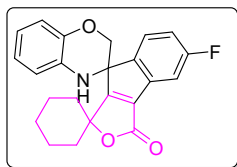

White solid (0.224g,74%),mp 269-273°C.<sup>1</sup>H NMR (400 MHz, CDCl<sub>3</sub>) δ 7.40 (dd, *J* = 8.4, 4.9 Hz, 1H), 7.11 (dd, *J* = 7.9, 2.3 Hz, 1H), 7.03 (dd, *J* = 8.9, 2.4 Hz, 1H), 6.96 (dd, *J* = 7.9, 1.4 Hz, 1H), 6.86 (dd, *J* = 7.5, 1.5 Hz, 1H), 6.79 (dd, *J* = 7.6, 1.6 Hz, 1H), 6.65 (dd, *J* = 7.7, 1.6 Hz, 1H), 4.57 (d, *J* = 8.5 Hz, 1H), 3.99 (d, *J* = 8.6 Hz, 1H), 3.94 (s, 1H), 1.97 – 1.78 (m, 10H);<sup>19</sup>F NMR (471 MHz, CDCl<sub>3</sub>) δ -111.87 (s);<sup>13</sup>C NMR (100 MHz, CDCl<sub>3</sub>) δ 177.0, 165.5, 164.1(d, <sup>1</sup>J<sub>C-F</sub> = 251.9 Hz, A-F), 164.0, 162.1, 150.8, 143.0, 137.3, 133.9, 133.9, 131.3, 126.5, 126.5, 122.3, 119.7(d, *J* = 6.5 Hz), 116.9, 116.9, 116.7, 116.4(d, <sup>2</sup>J<sub>C-F</sub> = 25.6 Hz, A-F), 84.7,68.8,60.4,34.8,34.7,24.5,21.7,21.69;HRMS(ESI)calcd for C<sub>23</sub>H<sub>20</sub>FNO<sub>3</sub>[M+H]<sup>+</sup>378.1477,found:378.1479.

**5'-Bromo-2*H*,3'*H*,4*H*-dispiro[benzo[*b*][1,4]oxazine-3,8'-indeno[1,2-*c*]furan-1',1''-cycloheptan]-3'-one(5k)**

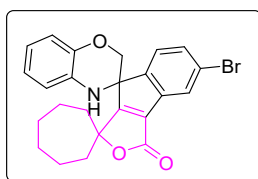

Brown solid (0.189g,83%),mp 256-260°C.<sup>1</sup>H NMR (400 MHz, CDCl<sub>3</sub>) δ 7.53 (d, *J* = 1.6 Hz, 1H), 7.47 (dd, *J* = 8.1, 1.7 Hz, 1H), 7.31 (d, *J* = 8.1 Hz, 1H), 6.96 (dd, *J* = 7.8, 1.4 Hz, 1H), 6.85 (dd, *J* = 7.5, 1.5 Hz, 1H), 6.79 (dd, *J* = 7.7, 1.6 Hz, 1H), 6.65 – 6.62 (m, 1H), 4.56 (d, *J* = 8.5 Hz, 1H), 3.98 (s, 1H), 3.93 (s, 1H), 2.14 – 1.92 (m, 6H), 1.88 – 1.65 (m, 6H);<sup>13</sup>C NMR (100 MHz, CDCl<sub>3</sub>) δ 178.1, 165.5, 154.2, 142.9, 135.6, 134.0, 133.1, 131.2, 126.7, 125.5, 122.8, 122.4, 119.7, 116.9, 116.4, 88.7, 68.5, 60.4, 38.0, 38.0, 28.7, 23.0, 23.0;HRMS(ESI)calcd for C<sub>24</sub>H<sub>22</sub>BrNO<sub>3</sub>[M+H]<sup>+</sup> 452.0639, found:452.0642.

**5'-Methyl-2*H*,3'*H*,4*H*-dispiro[benzo[*b*][1,4]oxazine-3,8'-indeno[1,2-*c*]furan-1',1''-cycloheptan]-3'-one (5l)**

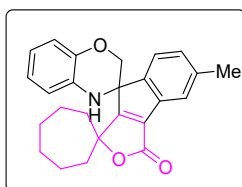

Brown solid (0.197g,84%),mp 243-250°C;<sup>1</sup>H NMR (400 MHz, CDCl<sub>3</sub>) δ 7.49 (s, 1H), 7.29 – 7.20 (m, 2H), 7.10 (d, *J* = 7.5 Hz, 1H), 6.86 (dd, *J* = 8.7, 7.5 Hz, 3H), 6.62 (d, *J* = 7.3 Hz, 1H), 4.39 (d, *J* = 8.9 Hz, 1H), 4.19 (d, *J* = 9.0 Hz, 1H), 3.88 (s, 1H), 2.39 (s, 3H), 1.94 – 1.50 (m, 12H).<sup>13</sup>C NMR (100 MHz, CDCl<sub>3</sub>) δ 182.8, 166.8, 145.6, 142.2, 140.0, 134.6, 132.9,

131.8, 123.9, 122.6, 122.3, 119.8, 117.0, 115.4, 92.2, 69.8, 63.6, 37.4, 37.0, 27.6, 27.5, 22.6, 22.3, 21.4; HRMS (ESI) calcd for C<sub>25</sub>H<sub>26</sub>NO<sub>3</sub>[M+H]<sup>+</sup> 388.1907, found: 388.1891.

**5'-Phenyl-2*H*,3'*H*,4*H*-dispiro[benzo[*b*][1,4]oxazine-3,8'-indeno[1,2-*c*]furan-1',1''-cycloheptan]-3'-one (5m)**

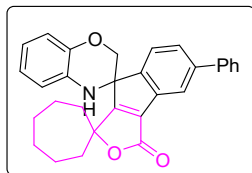

Yellow solid (0.182g, 80%), mp 256-260°C; <sup>1</sup>H NMR (400 MHz, CDCl<sub>3</sub>) δ 7.52 (dd, *J* = 8.9, 8.1, Hz, 7H), 7.41 (d, *J* = 7.2 Hz, 1H), 6.98 (d, *J* = 6.9 Hz, 1H), 6.86 (dd, *J* = 7.4, 6.4 Hz, 1H), 6.80 (dd, *J* = 7.5, 6.4 Hz, 1H), 6.69 – 6.64 (m, 1H), 4.62 (d, *J* = 8.5 Hz, 1H), 4.05 (d, *J* = 8.6 Hz, 1H), 3.98 (s, 1H), 2.22 – 1.94 (m, 6H), 1.90 – 1.66 (m, 6H); <sup>13</sup>C NMR (100 MHz, CDCl<sub>3</sub>) δ 182.9, 166.6, 147.4, 143.1, 142.3, 140.1, 134.6, 133.5, 131.6, 128.9, 127.8, 127.2, 126.6, 124.5, 122.7, 120.3, 119.9, 117.0, 115.5, 92.3, 69.7, 63.6, 37.5, 37.0, 27.7, 27.5, 22.6, 22.4; HRMS (ESI) calcd for C<sub>30</sub>H<sub>28</sub>NO<sub>3</sub>[M+H]<sup>+</sup> 450.2063, found: 450.2044.

**4',5'-Dichloro-2*H*,3'*H*,4*H*-dispiro[benzo[*b*][1,4]oxazine-3,8'-indeno[1,2-*c*]furan-1',1''-cyclopentan]-3'-one (5n)**

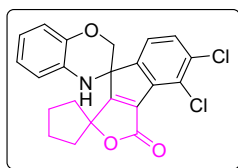

White solid (0.159g, 78%), mp 252-256°C. <sup>1</sup>H NMR (400 MHz, CDCl<sub>3</sub>) δ 7.71 (s, 1H), 7.46 (s, 1H), 6.90 (dd, *J* = 8.0, 7.9 Hz, 2H), 6.80 (d, *J* = 7.1 Hz, 1H), 6.64 (d, *J* = 7.7 Hz, 1H), 4.41 (d, *J* = 8.0 Hz, 1H), 4.21 (dd, *J* = 8.1, 1.5 Hz, 1H), 4.02 (s, 1H), 2.55 – 2.43 (m, 1H), 1.97 – 1.87 (m, 2H), 1.85 – 1.74 (m, 3H), 1.65 (dd, *J* = 11.4, 7.5 Hz, 2H); <sup>13</sup>C NMR (100 MHz, CDCl<sub>3</sub>) δ 180.2, 165.4, 148.1, 142.1, 135.1, 134.1, 132.5, 131.9, 130.9, 126.4, 123.1, 122.9, 120.3, 117.1, 115.5, 97.0, 69.5, 63.5, 36.6, 25.0, 24.8; HRMS (ESI) calcd for C<sub>22</sub>H<sub>17</sub>Cl<sub>2</sub>NO<sub>3</sub>[M+H]<sup>+</sup> 414.0634, found: 414.0618.

**6-Methoxy-5'-methyl-2*H*,3'*H*,4*H*-dispiro[benzo[*b*][1,4]oxazine-3,8'-indeno[1,2-*c*]furan-1',1''-cycloheptan]-3'-one (5o)**

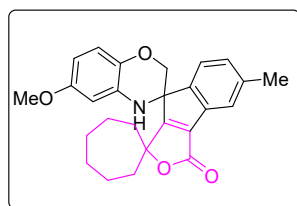

Yellow solid (0.198g, 83%), mp 186-190°C. <sup>1</sup>H NMR (400 MHz, CDCl<sub>3</sub>) δ 7.34 (d, *J* = 7.8 Hz, 1H), 7.22 (s, 1H), 7.16 (d, *J* = 7.8 Hz, 1H), 6.87 (d, *J* = 8.8 Hz, 1H), 6.33 (dd, *J* = 8.8, 2.8 Hz, 1H), 6.20 (d, *J* = 2.8 Hz, 1H), 4.50 (d, *J* = 8.6 Hz, 1H), 3.93 (d, *J* = 8.3 Hz, 1H), 3.92 (s,

1H), 3.72 (s, 3H), 2.42 (s, 3H), 2.17 – 1.94 (m, 6H), 1.86 -1.68 (m, 6H); <sup>13</sup>C NMR (100 MHz, CDCl<sub>3</sub>) δ 179.7, 166.1, 154.9, 152.6, 139.0, 137.3, 134.4, 132.3, 132.2, 131.1, 125.0, 123.2, 117.1, 104.5, 101.8, 88.6, 69.0, 60.4, 55.5, 38.0, 29.7, 28.8, 23.1, 23.0, 21.5; HRMS(ESI) calcd for C<sub>26</sub>H<sub>28</sub>NO<sub>4</sub>[M+H]<sup>+</sup>418.2012,found:418.1996.

**2H,3'H,4H-Dispiro[benzo[b][1,4]oxazine-3,8'-indeno[1,2-c]furan-1',1''-cyclooctan]-3'-one (5p)**

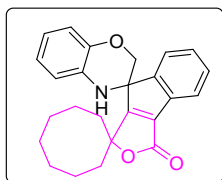

Yellow solid (0.232 g,80%),mp 190-196 °C.<sup>1</sup>H NMR (400 MHz, CDCl<sub>3</sub>) δ 7.65 (d, *J* = 7.4 Hz, 1H), 7.39 (dd, *J* = 8.4, 8.2, Hz, 2H), 7.32 – 7.25 (m, 1H), 6.97 (dd, *J* = 8.0, 1.1 Hz, 1H), 6.88 (dd, *J* = 7.6, 1.4 Hz, 1H), 6.79 (dd, *J* = 7.7, 1.5 Hz, 1H), 6.63 (dd, *J* = 7.8, 1.5 Hz, 1H), 4.43 (d, *J* = 8.0 Hz, 1H), 4.21 (d, *J* = 8.6, 6.3 Hz, 1H), 3.93 (s, 1H), 2.40 (dd, *J* = 8.2, 8.3 Hz, 1H), 2.06 – 1.29 (m, 13H); <sup>13</sup>C NMR (100 MHz, CDCl<sub>3</sub>) δ 183.4, 166.6, 148.5, 142.2, 134.9, 132.9, 131.8, 129.7, 127.8, 124.2, 122.6, 121.5, 119.8, 117.1, 115.5, 91.6, 69.8, 63.8, 33.7, 29.7, 27.6, 27.5, 21.8, 21.4, 21.1; HRMS(ESI)calcd for C<sub>25</sub>H<sub>26</sub>NO<sub>3</sub>[M+H]<sup>+</sup>388.1907 found:388.1913.

**5'-(Phenylethynyl)-2H,3'H,4H-dispiro[benzo[b][1,4]oxazine-3,8'-indeno[1,2-c]furan-1',1''-cycloheptan]-3'-one(5k')**

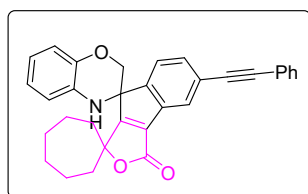

Yellow solid (0.190g,0.86%),mp 212-218°C.<sup>1</sup>H NMR (500 MHz, CDCl<sub>3</sub>) δ 7.58 – 7.53 (m, 3H), 7.50 (dd, *J* = 7.9, 1.4 Hz, 1H), 7.42 (d, *J* = 5.8 Hz, 1H), 7.40 – 7.35 (m, 3H), 6.98 (dd, *J* = 7.9, 1.4 Hz, 1H), 6.86 (d, *J* = 7.6, 1.5 Hz, 1H), 6.80 (d, *J* = 7.7, 1.6 Hz, 1H), 6.66 (dd, *J* = 7.8, 1.5 Hz, 1H), 4.60 (d, *J* = 8.5 Hz, 1H), 4.01 (d, *J* = 8.6 Hz, 1H), 3.96 (s, 1H), 2.22 – 1.94 (m, 6H), 1.89 – 1.67 (m, 6H). <sup>13</sup>C NMR (125 MHz, CDCl<sub>3</sub>) δ 178.9, 165.7, 135.0, 133.7, 132.4, 131.7, 128.8, 128.5, 125.3, 125.2, 124.3, 124.1, 122.5, 122.3, 117.0, 116.5, 88.7, 88.2, 68.6, 60.6, 38.0, 29.7, 28.7, 23.0, 20.9. HRMS (ESI)calcd for C<sub>32</sub>H<sub>27</sub>NO<sub>3</sub>[M+H]<sup>+</sup>473.1991, found:473.1998.

**1',1'-Dimethyl-2H,4H-spiro[benzo[b][1,4]oxazine-3,8'-indeno[1,2-c]furan]-3'(1'H)-thione(3a')**



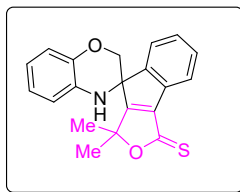

Yellow solid (0.170g, 0.71%), mp 193-196°C.  $^1\text{H NMR}$  (400 MHz,  $\text{CDCl}_3$ )  $\delta$  7.48 – 7.35 (m, 4H), 6.99 (dd,  $J = 7.8, 1.5$  Hz, 1H), 6.88 (dd,  $J = 7.5, 1.6$  Hz, 1H), 6.82 (dd,  $J = 7.6, 1.7$  Hz, 1H), 6.73 (dd,  $J = 7.7, 1.6$  Hz, 1H), 4.83 (d,  $J = 9.2$  Hz, 1H), 4.13 (s, 1H), 3.90 (d,  $J = 9.8$  Hz, 1H), 1.85 (s, 3H), 1.82 (s, 3H).  $^{13}\text{C NMR}$  (100 MHz,  $\text{CDCl}_3$ )  $\delta$  202.2, 175.3, 156.4, 144.6, 143.3, 131.5, 131.4, 131.1, 129.1, 125.5, 122.7, 122.3, 119.7, 117.1, 117.0, 91.9, 68.3, 60.7. HRMS (ESI) calcd for  $\text{C}_{20}\text{H}_{17}\text{NO}_2\text{S}[\text{M}+\text{H}]^+$  335.0980, found: 335.0987.

#### Ethyl 2'-phenyl-2H,4H-spiro[benzo[b][1,4]oxazine-3,1'-indene]-3'-carboxylate (5q)

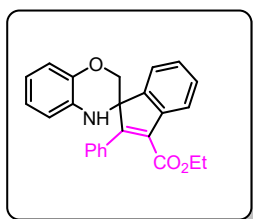

$^1\text{H NMR}$  (400 MHz,  $\text{CDCl}_3$ )  $\delta$  7.50 – 7.43 (m, 3H), 7.41 (ddd,  $J = 5.6, 4.0, 1.8$  Hz, 3H), 7.32 – 7.27 (m, 2H), 7.22 (dt,  $J = 6.3, 3.6$  Hz, 1H), 6.99 (dd,  $J = 7.9, 1.5$  Hz, 1H), 6.87 (td,  $J = 7.5, 1.5$  Hz, 1H), 6.79 (td,  $J = 7.7, 1.5$  Hz, 1H), 6.73 (dd,  $J = 7.7, 1.5$  Hz, 1H), 4.86 (d,  $J = 10.4$  Hz, 1H), 4.06 (ddd,  $J = 13.2, 6.6, 3.1$  Hz, 2H), 4.02 – 3.99 (m, 1H), 0.95 (t,  $J = 7.1$  Hz, 3H).

#### (3'-Phenyl-2H,4H-spiro[benzo[b][1,4]oxazine-3,1'-indene]-2'-yl)methanol (5r)

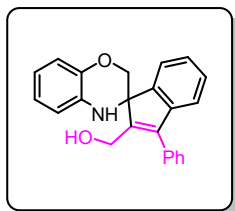

$^1\text{H NMR}$  (400 MHz,  $\text{CDCl}_3$ )  $\delta$  7.55 (d,  $J = 7.3$  Hz, 1H), 7.47 (d,  $J = 4.7$  Hz, 2H), 7.33 (s, 4H), 7.13 (dd,  $J = 25.0, 17.5$  Hz, 2H), 6.83 (dd,  $J = 12.9, 7.5$  Hz, 2H), 6.76 – 6.61 (m, 2H), 4.66 (t,  $J = 15.1$  Hz, 1H), 4.58 (d,  $J = 12.0$  Hz, 1H), 4.14 (t,  $J = 12.8$  Hz, 1H), 3.96 (d,  $J = 10.6$  Hz, 1H).

#### 4. NMR spectra of the products: $^1\text{H}$ NMR (500 MHz, $\text{CDCl}_3$ ) spectrum of **3a**

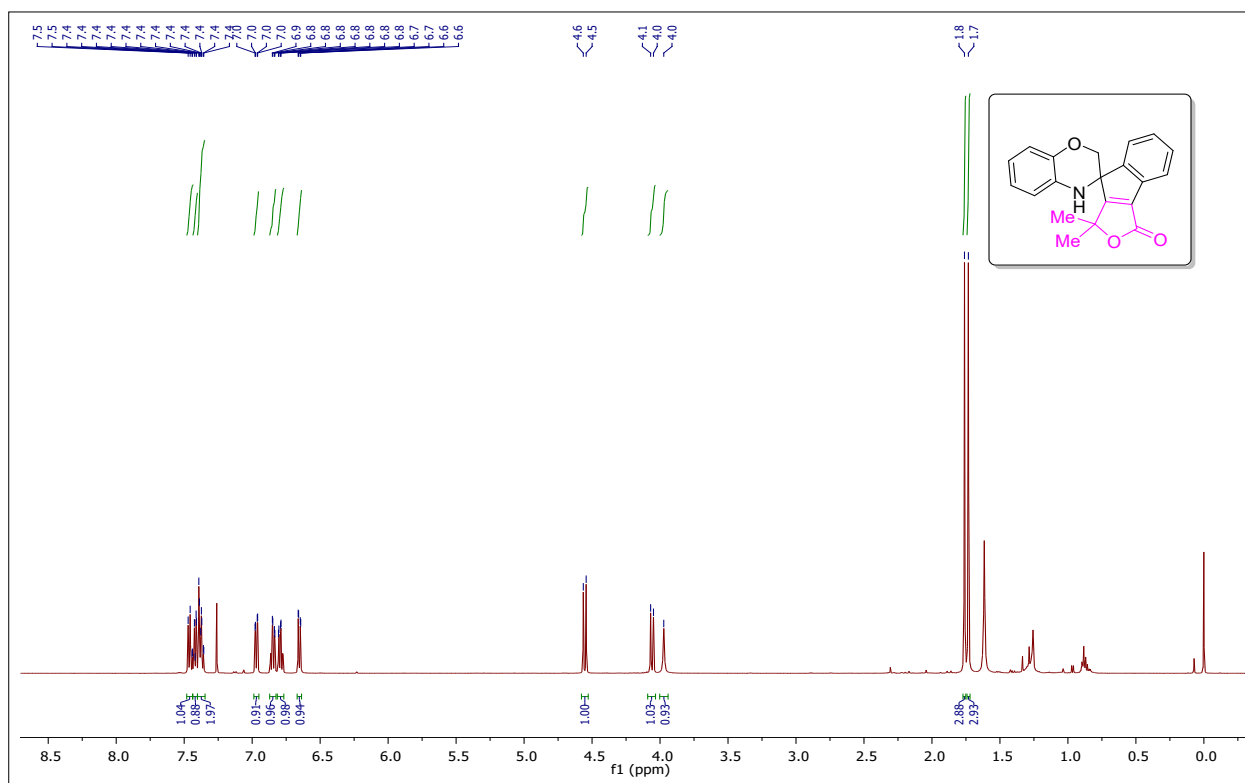

#### $^{13}\text{C}\{^1\text{H}\}$ NMR (125 MHz, $\text{CDCl}_3$ ) spectrum of compound **3a**

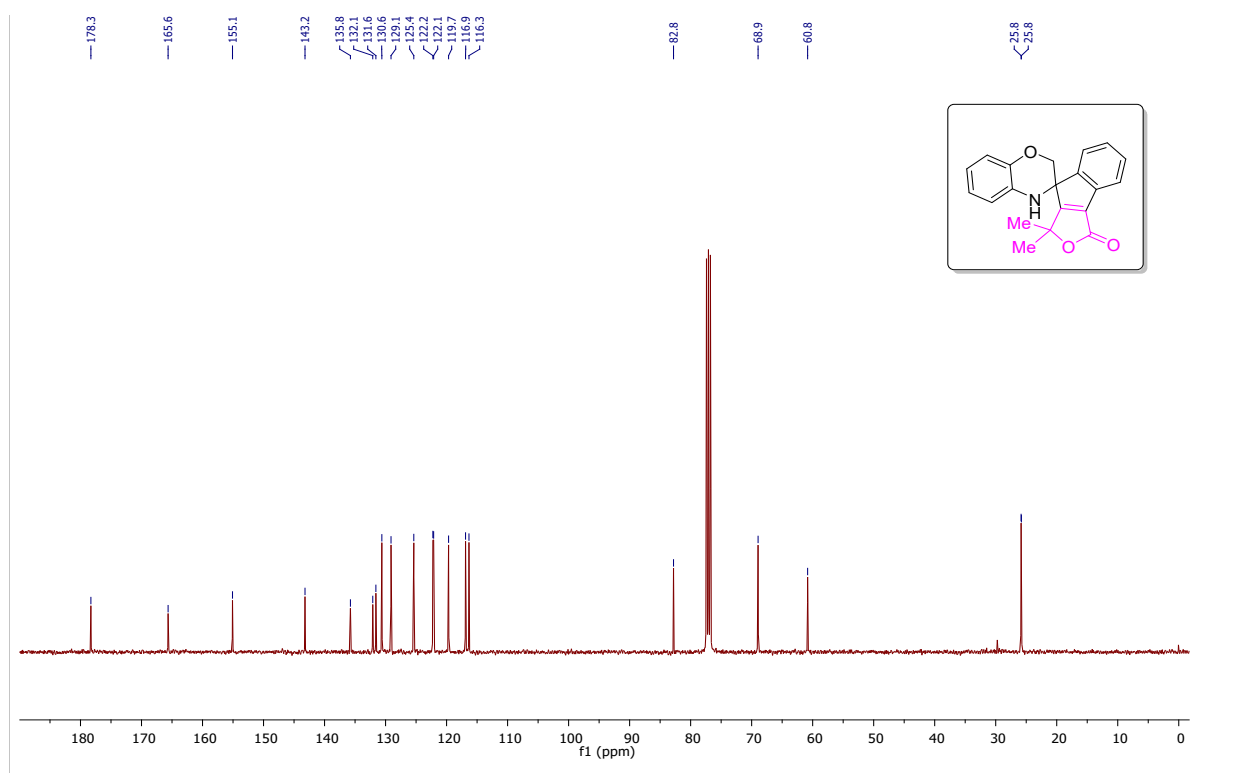

**$^1\text{H}$  NMR (400 MHz,  $\text{CDCl}_3$ ) spectrum of compound **3b****

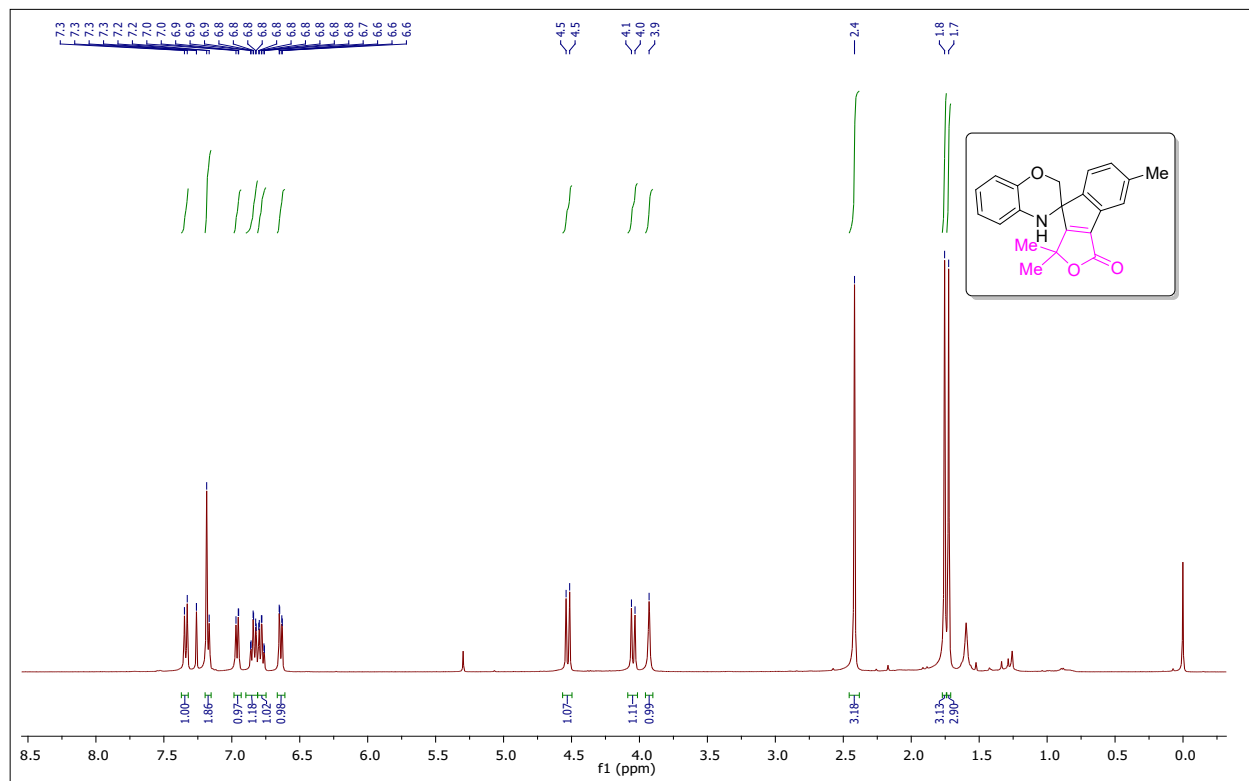

**$^{13}\text{C}\{^1\text{H}\}$  NMR (100 MHz,  $\text{CDCl}_3$ ) spectrum of compound **3b****

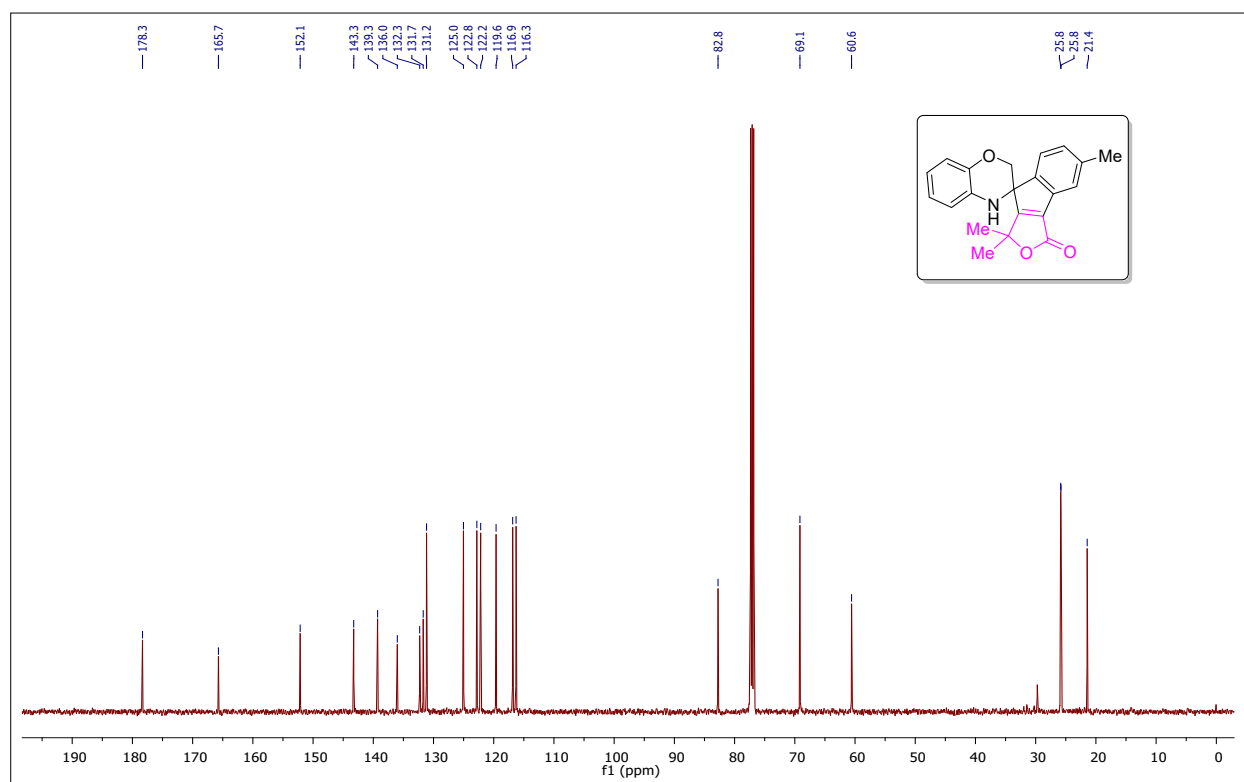

**$^1\text{H}$  NMR (500 MHz,  $\text{CDCl}_3$ ) spectrum of compound **3c****

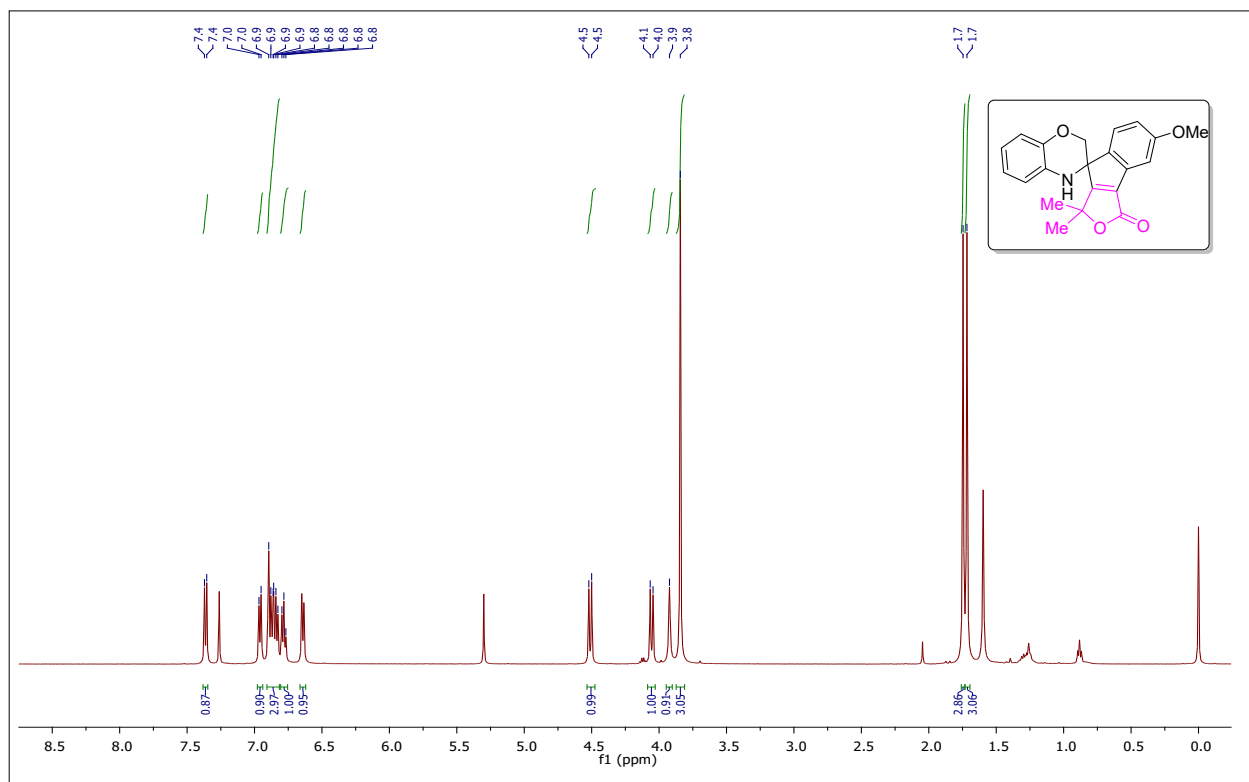

**$^{13}\text{C}\{^1\text{H}\}$  NMR (125 MHz,  $\text{CDCl}_3$ ) spectrum of compound **3c****

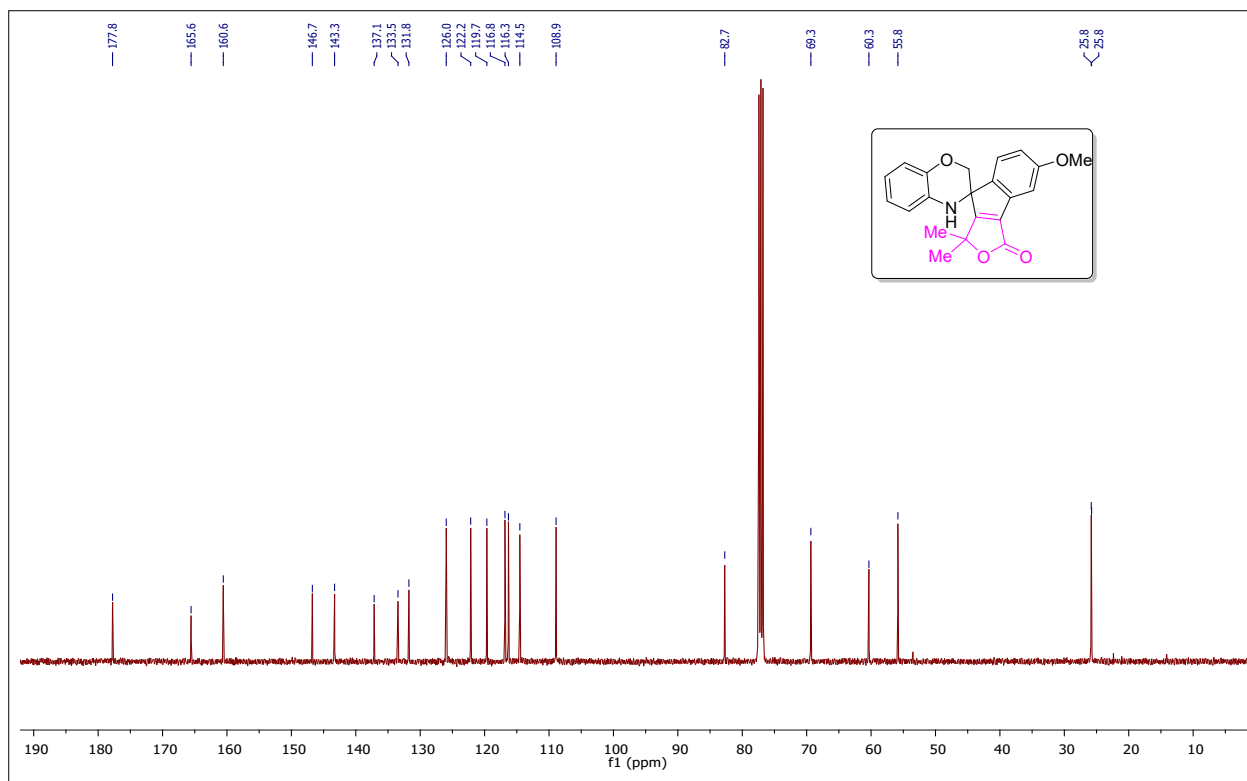

**$^1\text{H}$  NMR (400 MHz,  $\text{CDCl}_3$ ) spectrum of compound **3d****

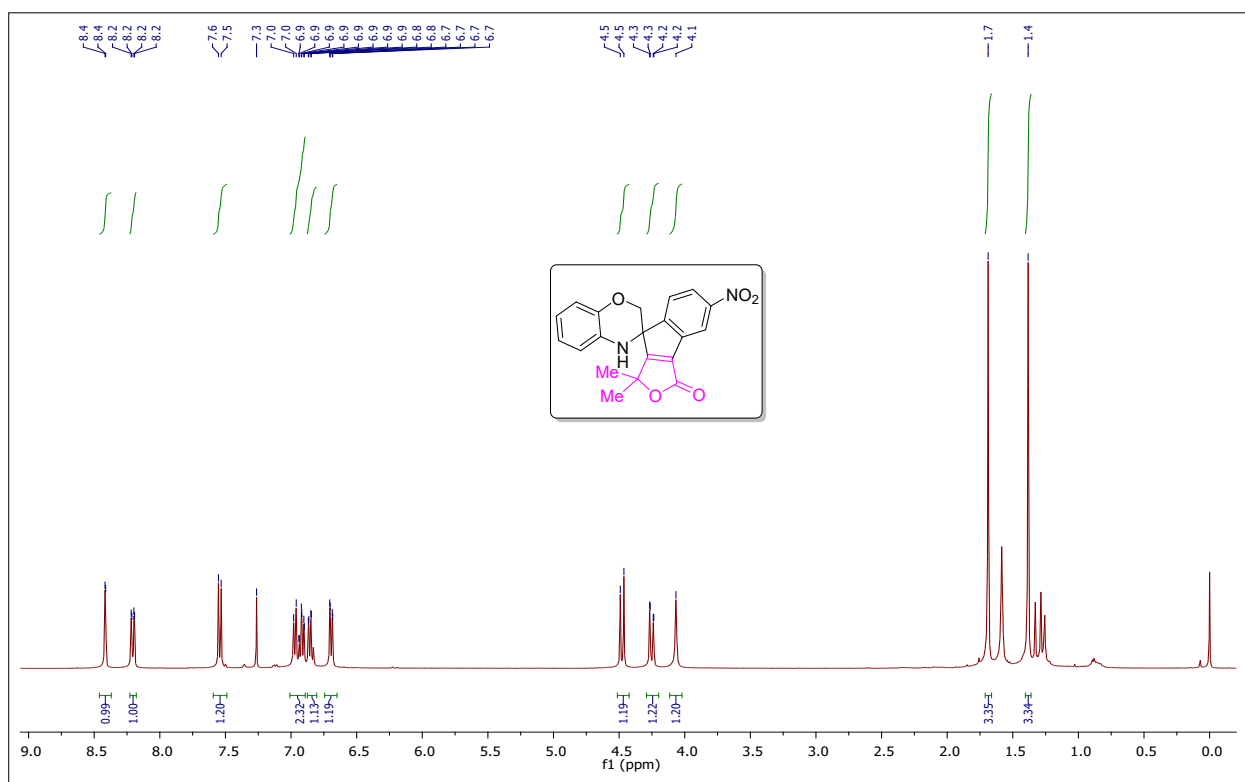

**$^{13}\text{C}\{^1\text{H}\}$  NMR (100 MHz,  $\text{CDCl}_3$ ) spectrum of compound **3d****

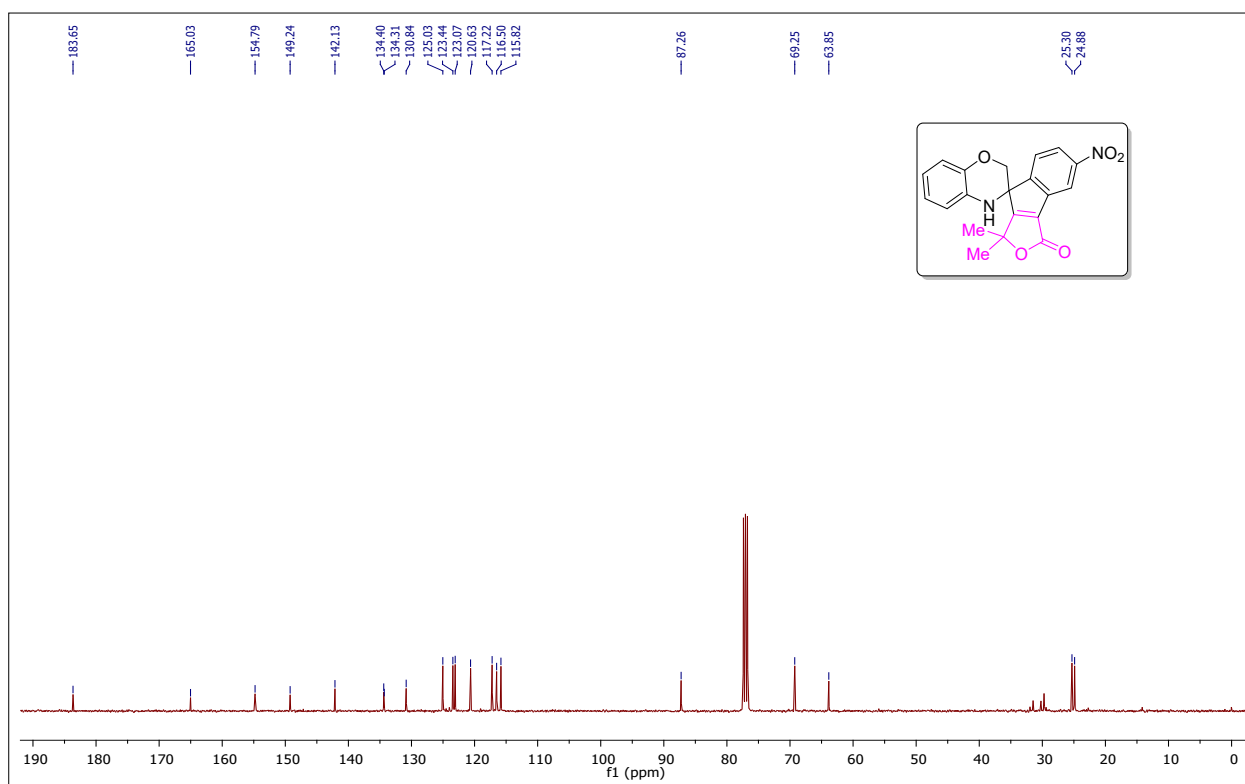

**$^1\text{H}$  NMR (400 MHz,  $\text{CDCl}_3$ ) spectrum of compound **3e****

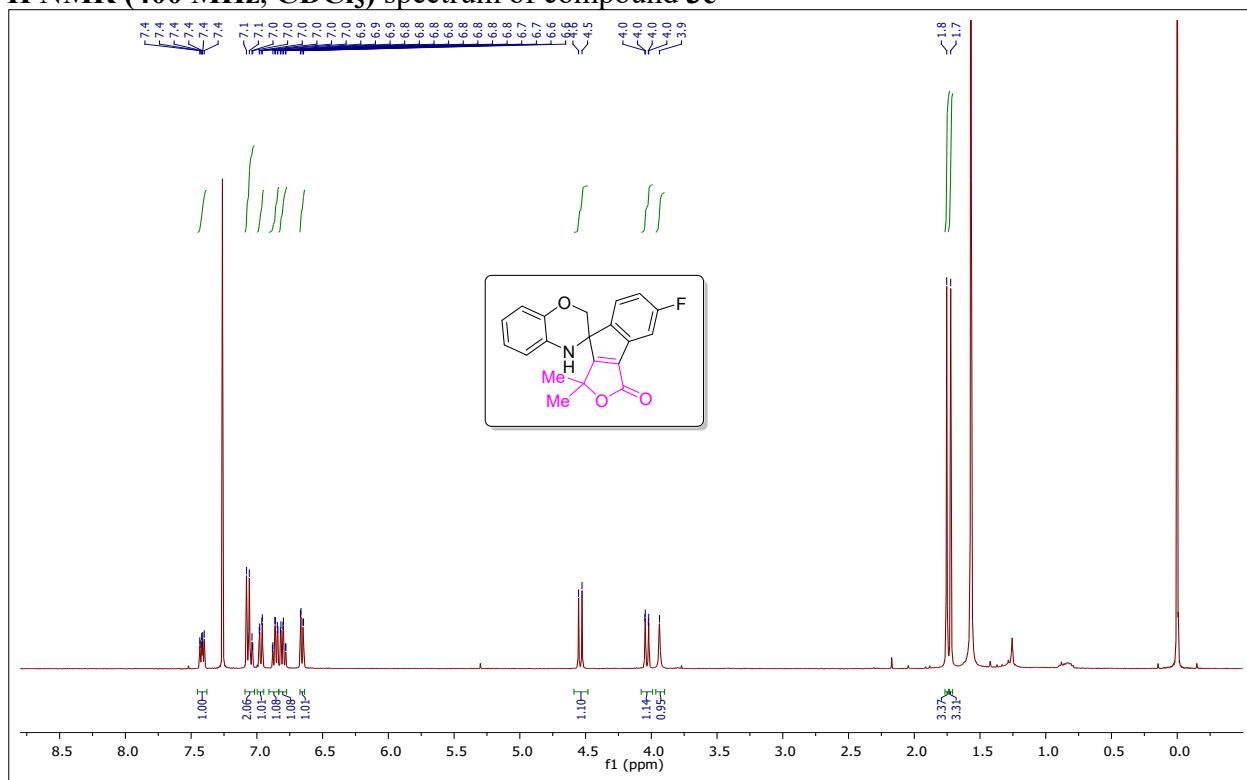

**$^{13}\text{C}\{^1\text{H}\}$  NMR (100 MHz,  $\text{CDCl}_3$ ) spectrum of compound **3e****

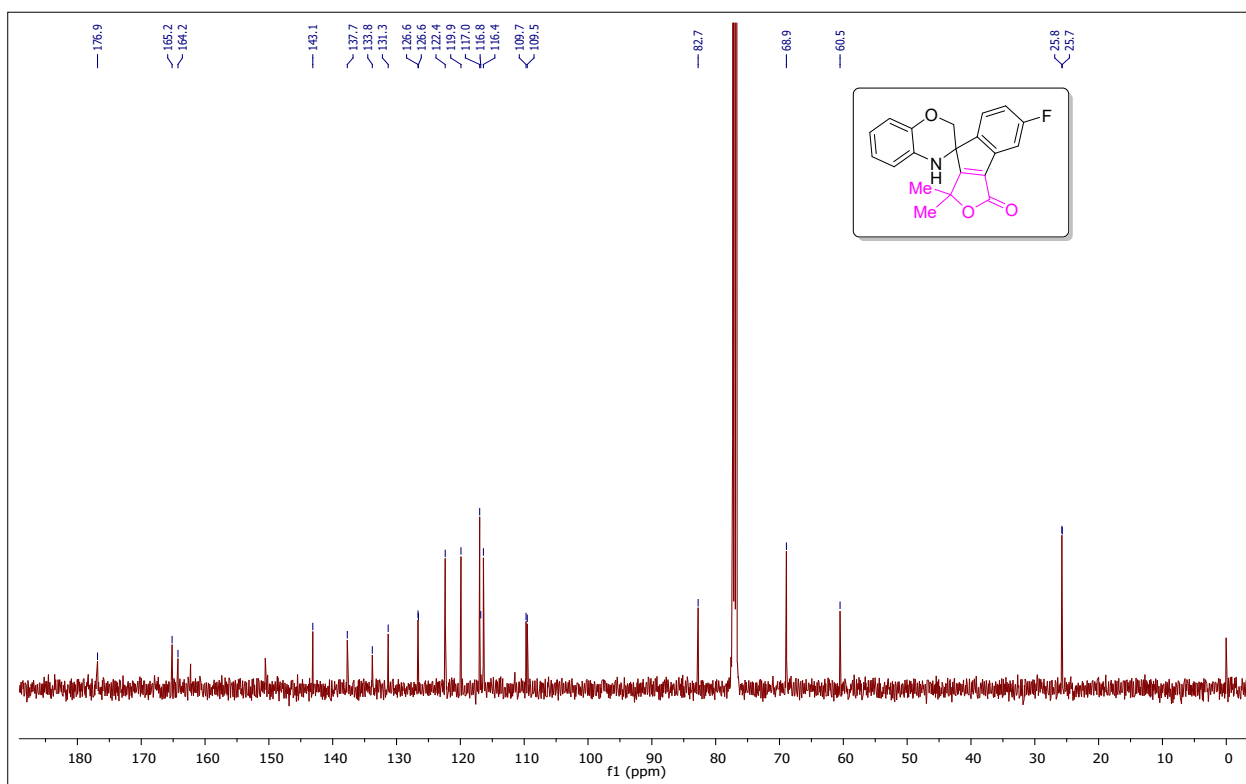

**<sup>19</sup>F NMR (400 MHz, CDCl<sub>3</sub>) spectrum of compound 3e**

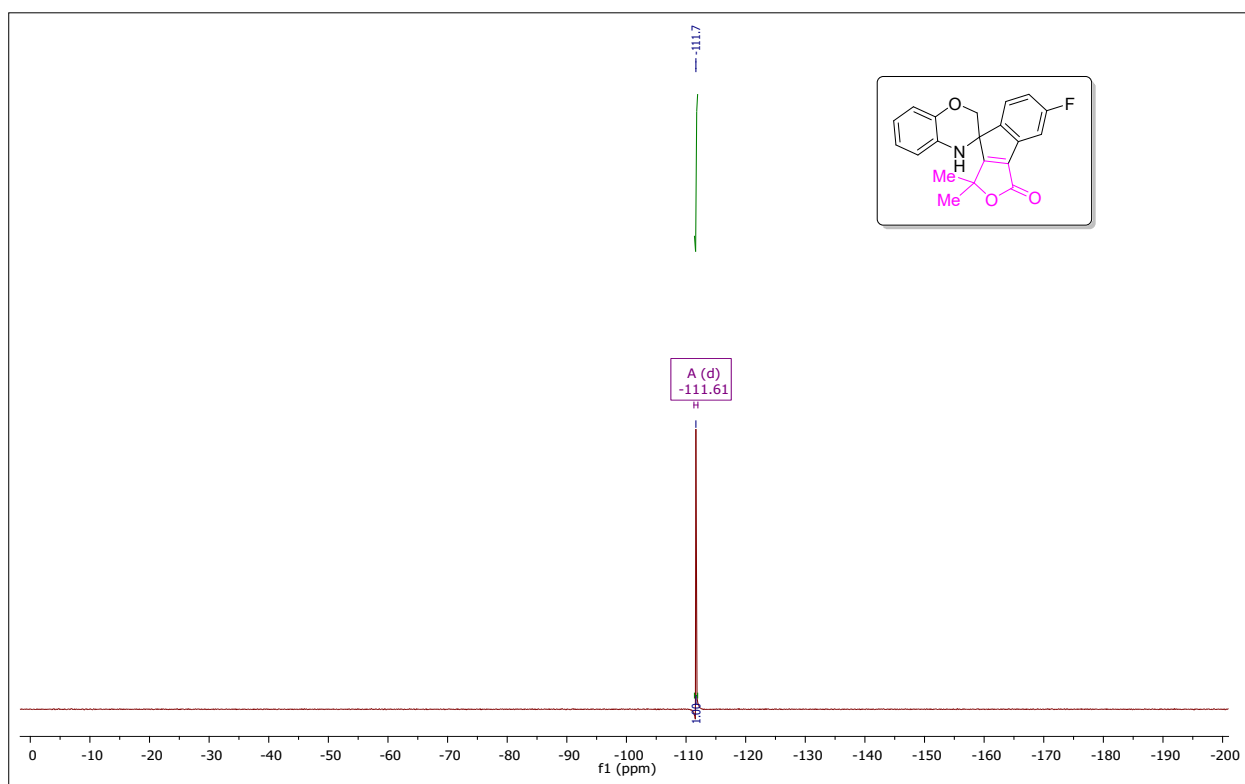

**$^1\text{H}$  NMR (500 MHz,  $\text{CDCl}_3$ ) spectrum of compound **3f****

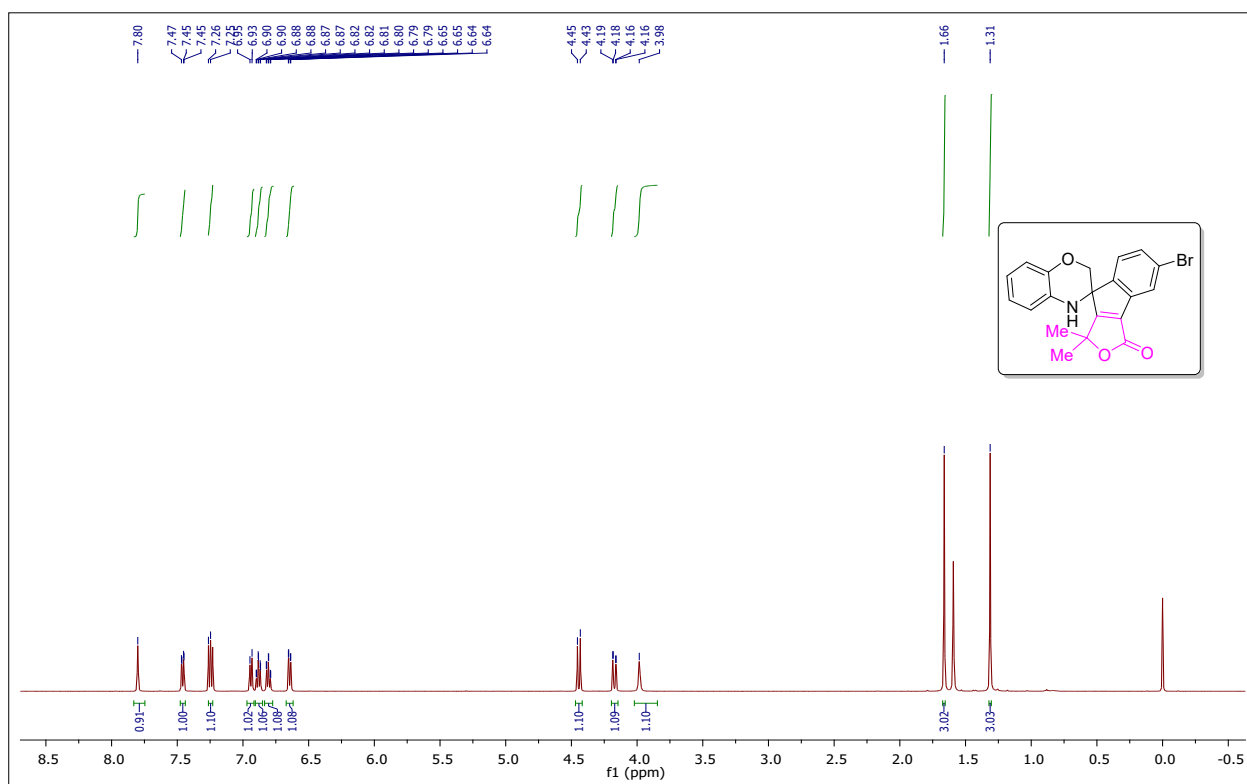

**$^{13}\text{C}\{^1\text{H}\}$  NMR (125 MHz,  $\text{CDCl}_3$ ) spectrum of compound **3f****

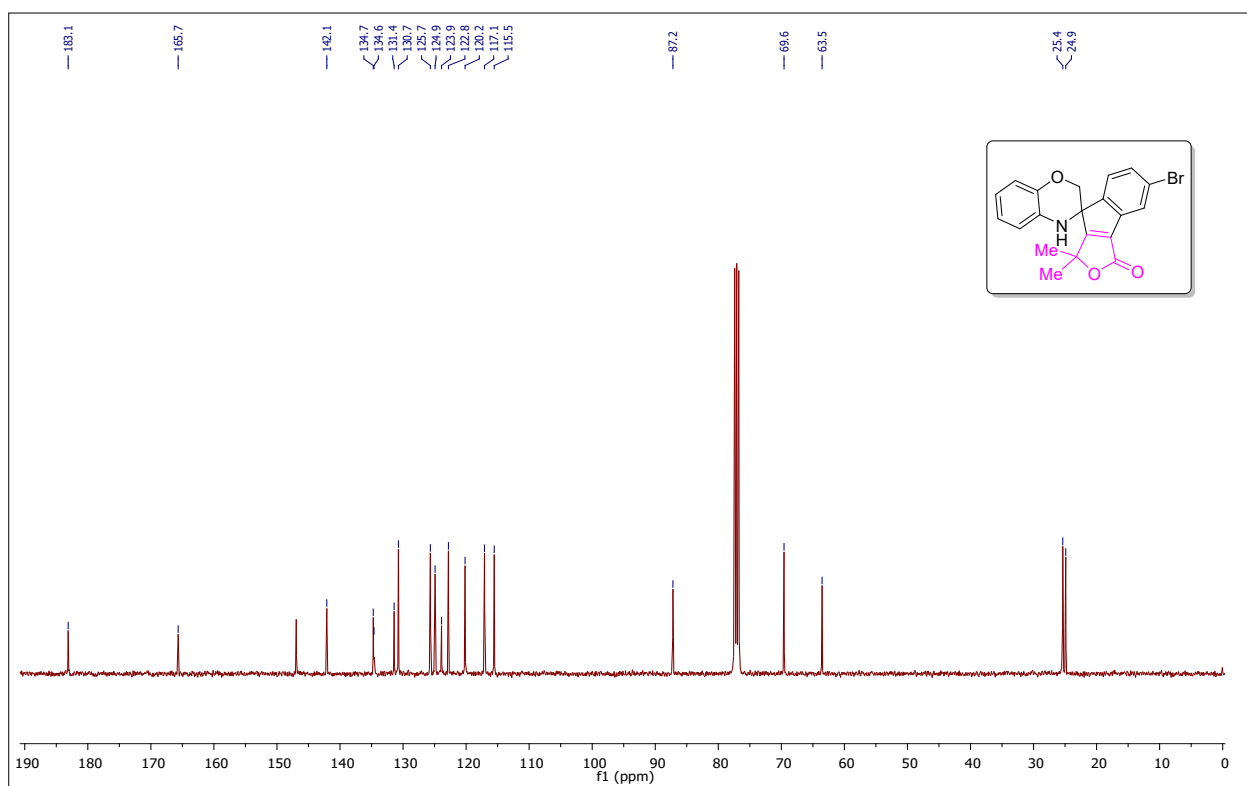



**$^1\text{H}$  NMR (500 MHz,  $\text{CDCl}_3$ ) spectrum of compound **3g****

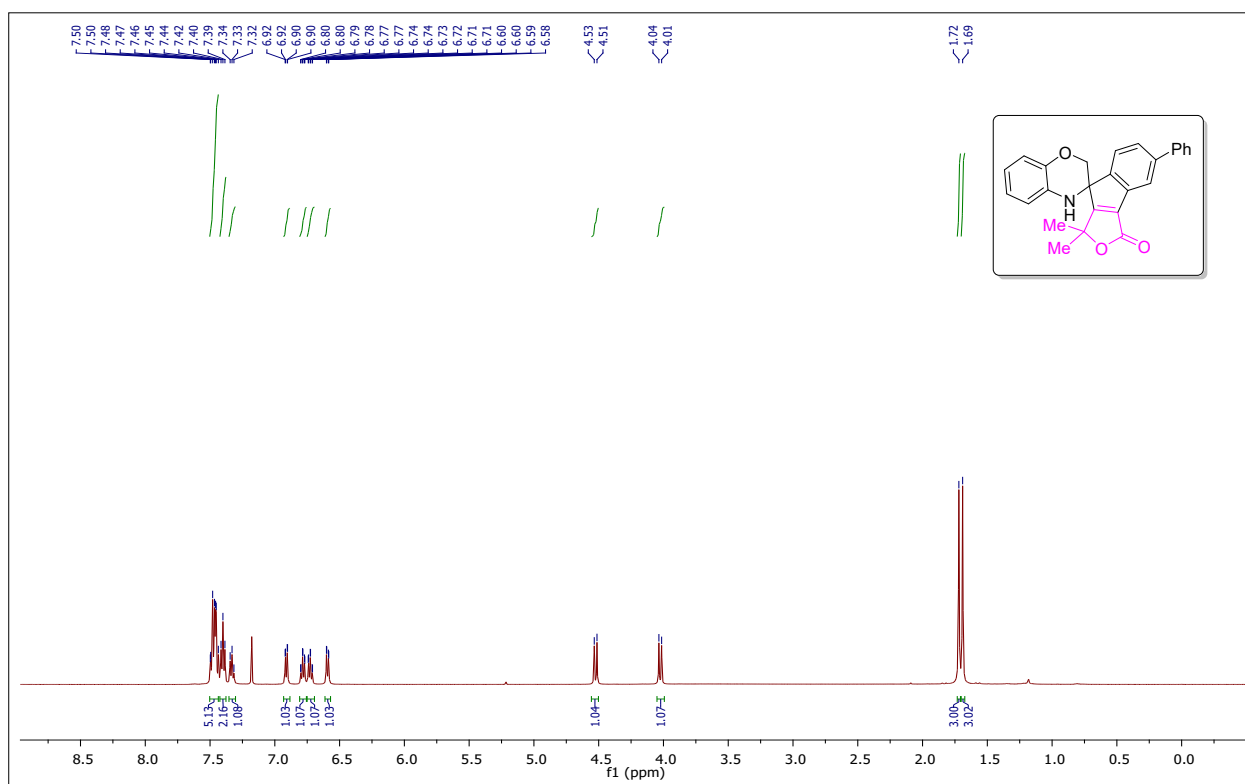

**$^{13}\text{C}\{^1\text{H}\}$  NMR (125 MHz,  $\text{CDCl}_3$ ) spectrum of compound **3g****

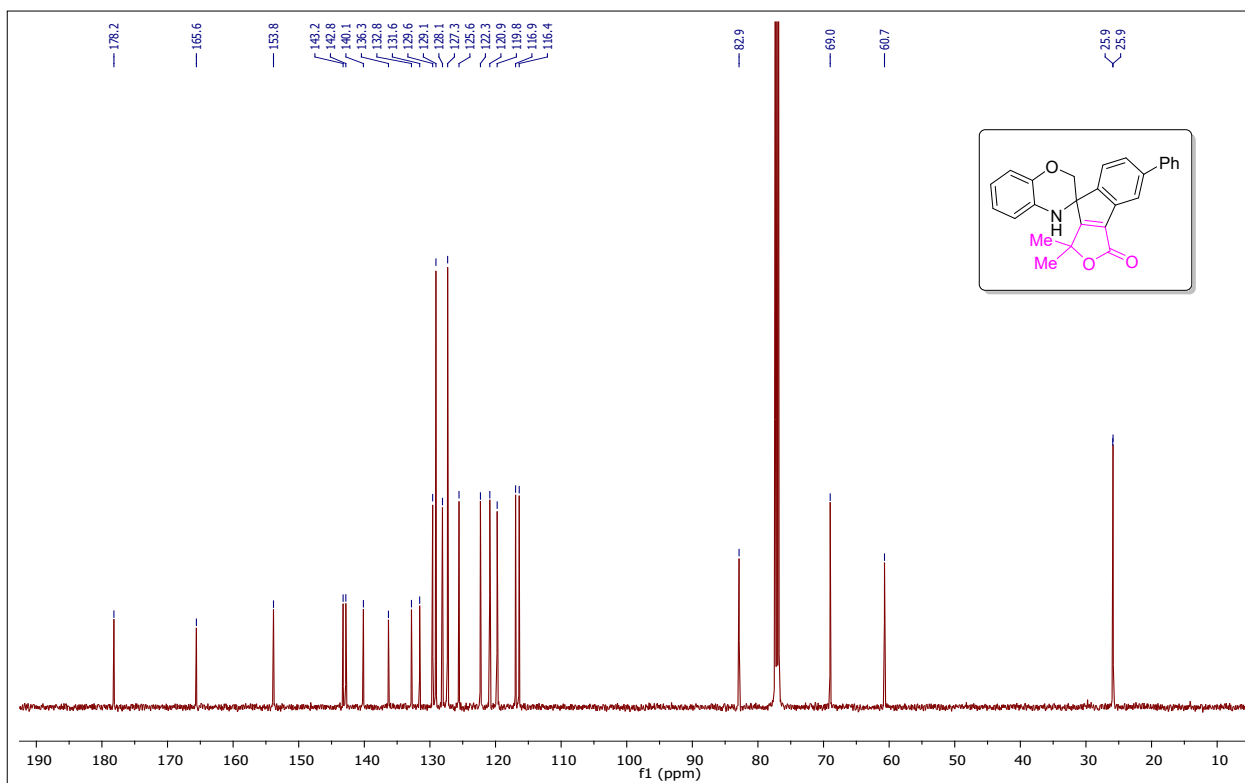

**$^1\text{H}$  NMR (400 MHz,  $\text{CDCl}_3$ ) spectrum of compound **3h****

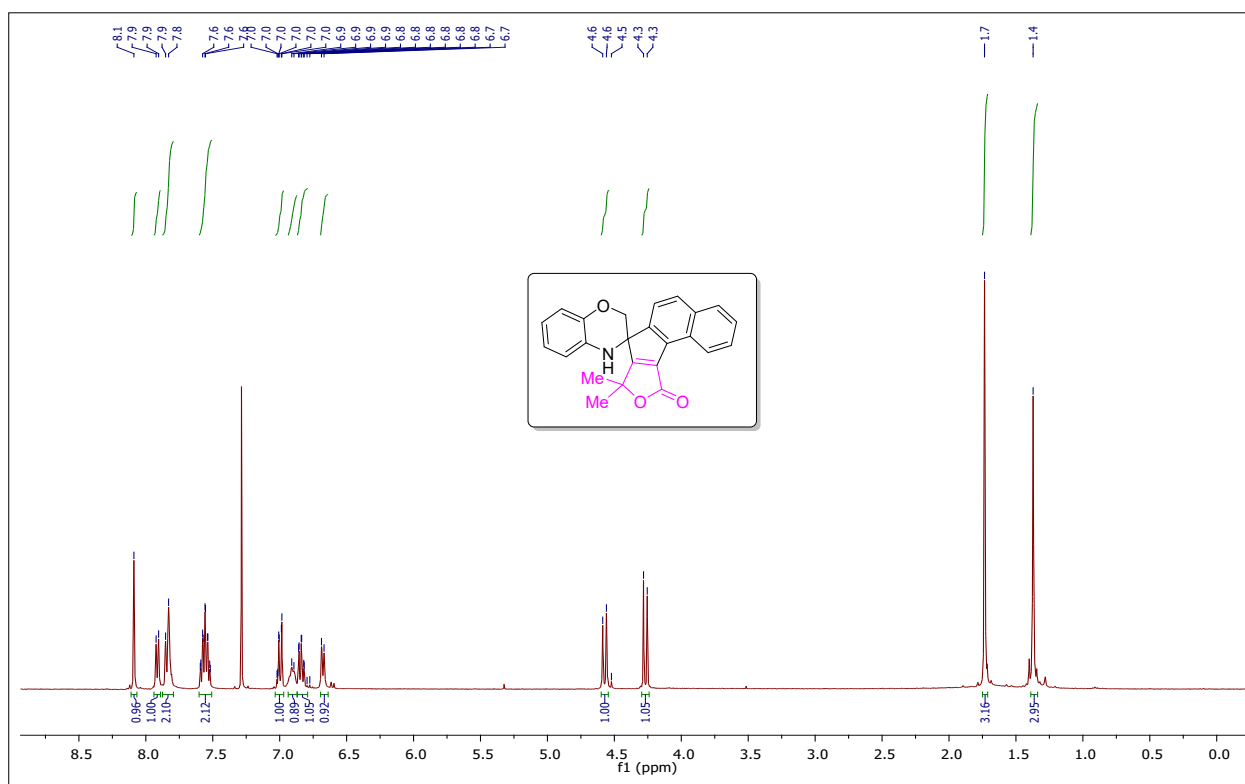

**$^{13}\text{C}\{^1\text{H}\}$  NMR (100 MHz,  $\text{CDCl}_3$ ) spectrum of compound **3h****

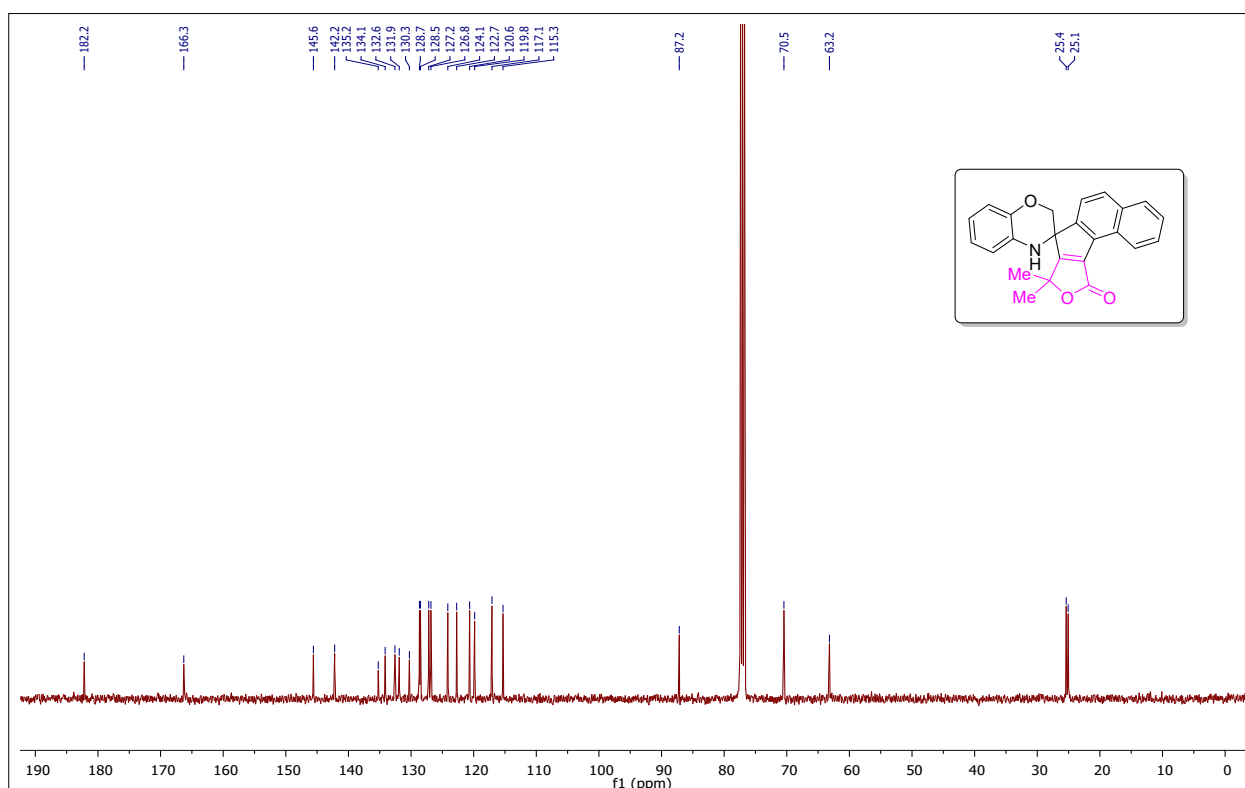

**$^1\text{H}$  NMR (500 MHz,  $\text{CDCl}_3$ ) spectrum of compound **3i****

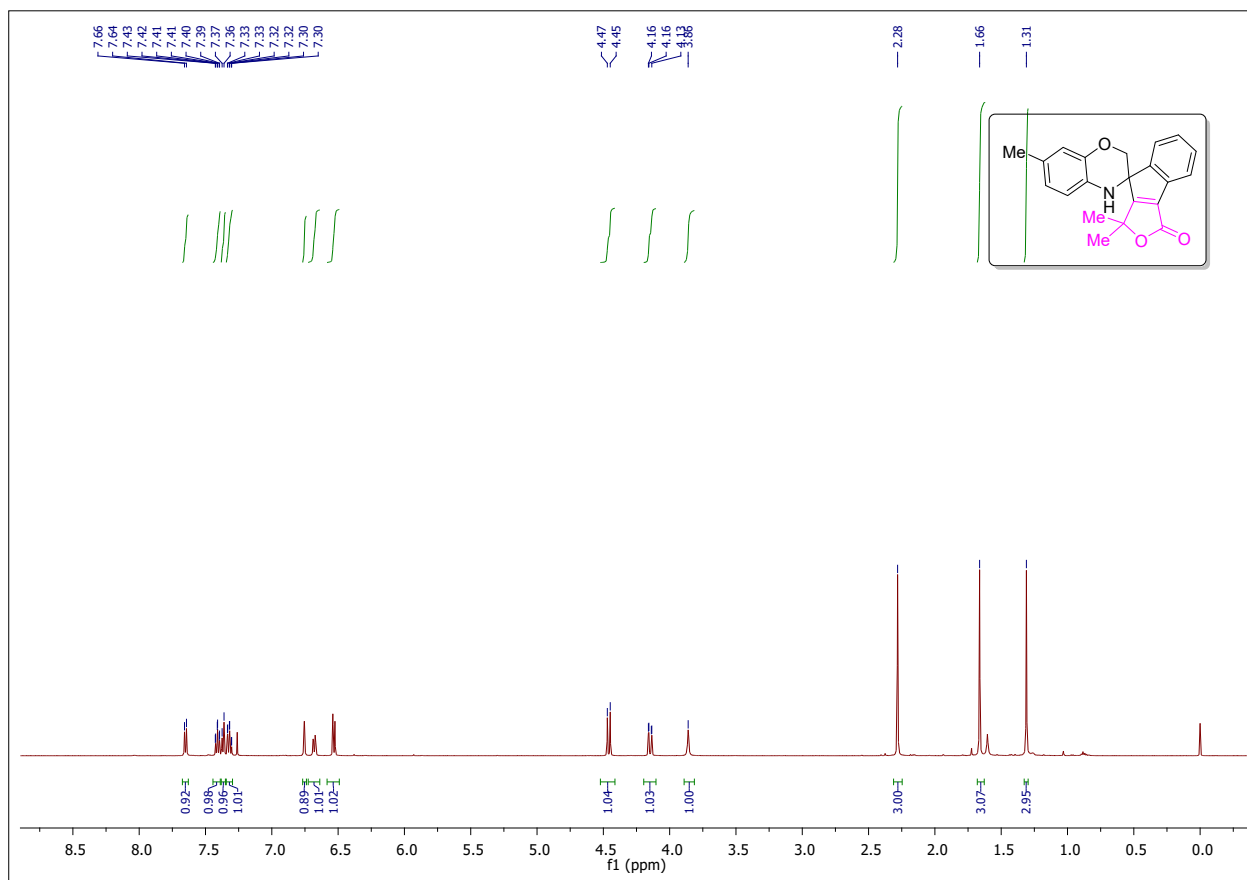

**$^{13}\text{C}\{^1\text{H}\}$  NMR (125 MHz,  $\text{CDCl}_3$ ) spectrum of compound **3i****

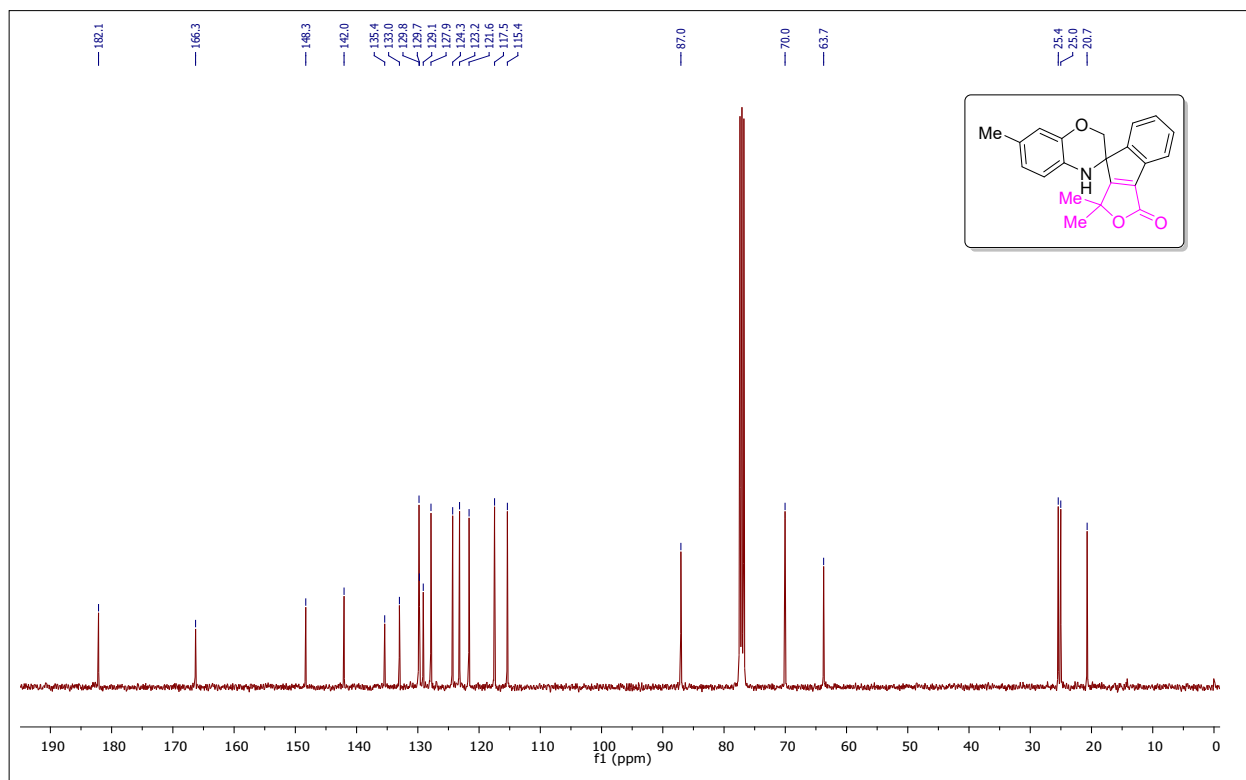

**$^1\text{H}$  NMR (400 MHz,  $\text{CDCl}_3$ ) spectrum of compound **3j****

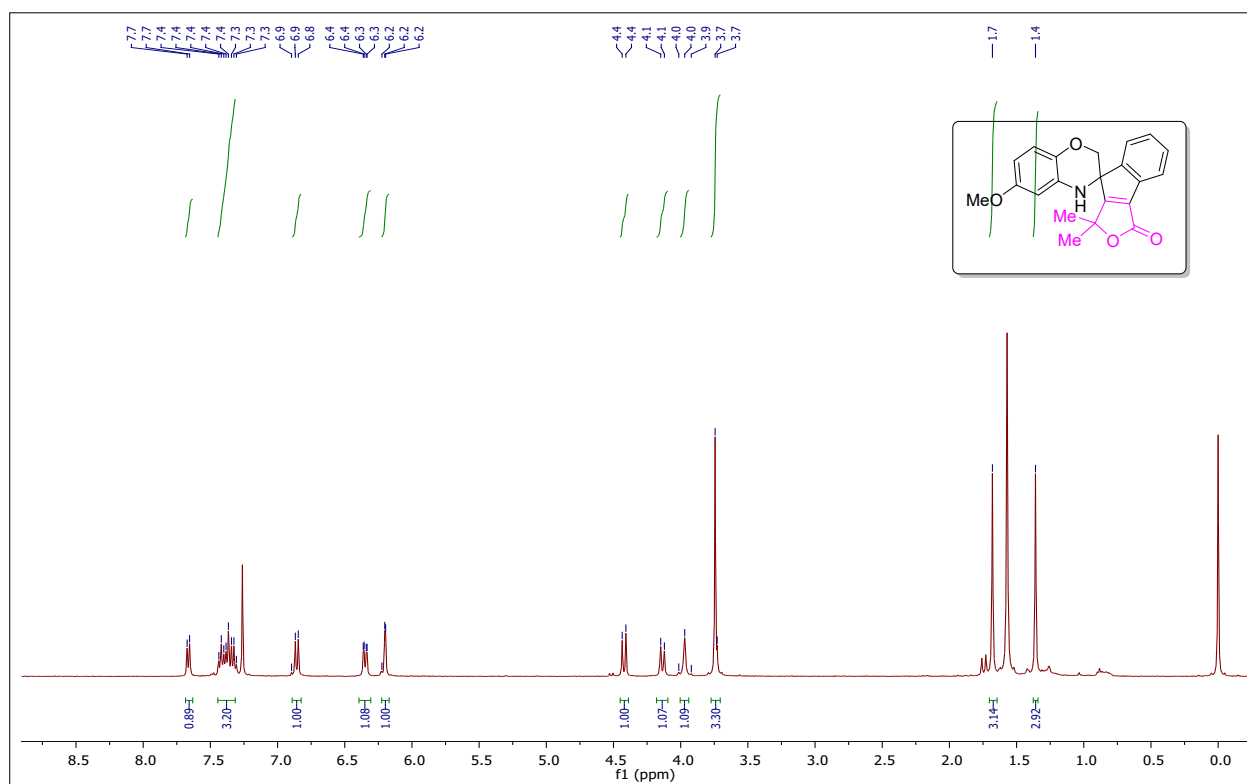

**$^{13}\text{C}\{^1\text{H}\}$  NMR (100 MHz,  $\text{CDCl}_3$ ) spectrum of compound **3j****

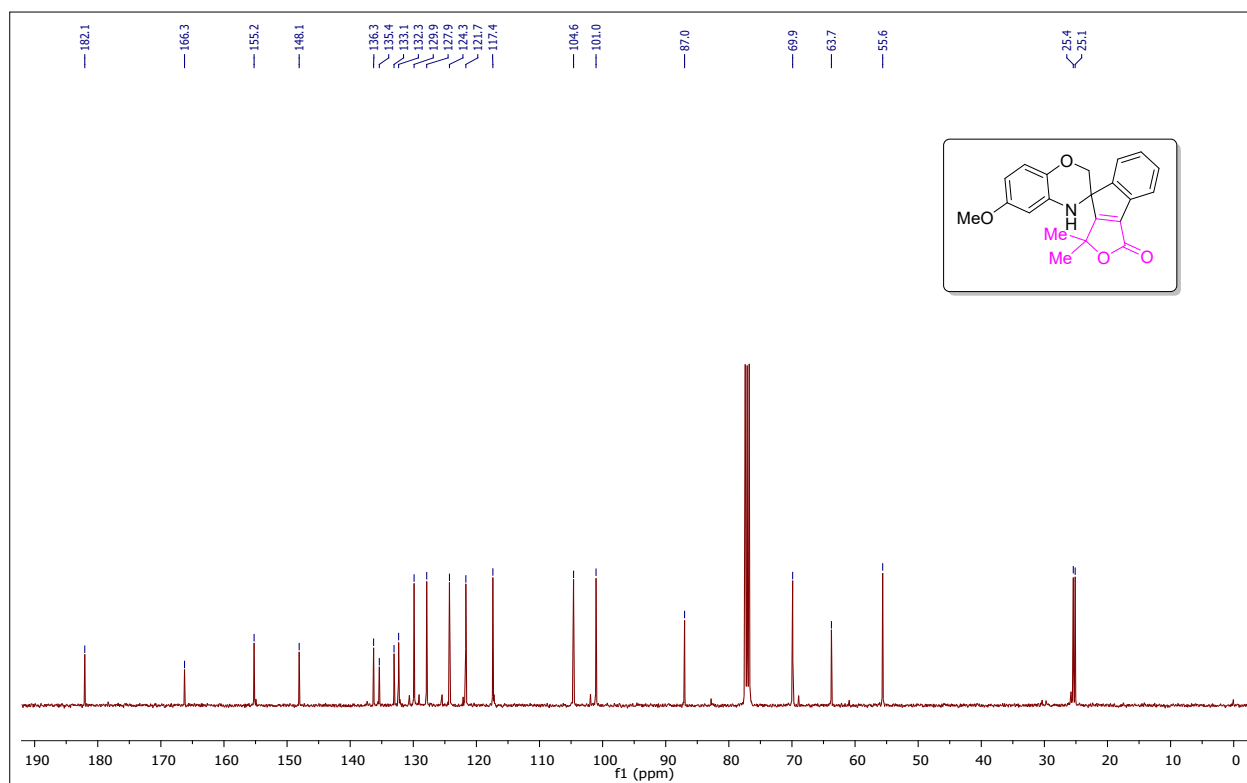

**$^1\text{H}$  NMR (500 MHz,  $\text{CDCl}_3$ ) spectrum of compound **3k****

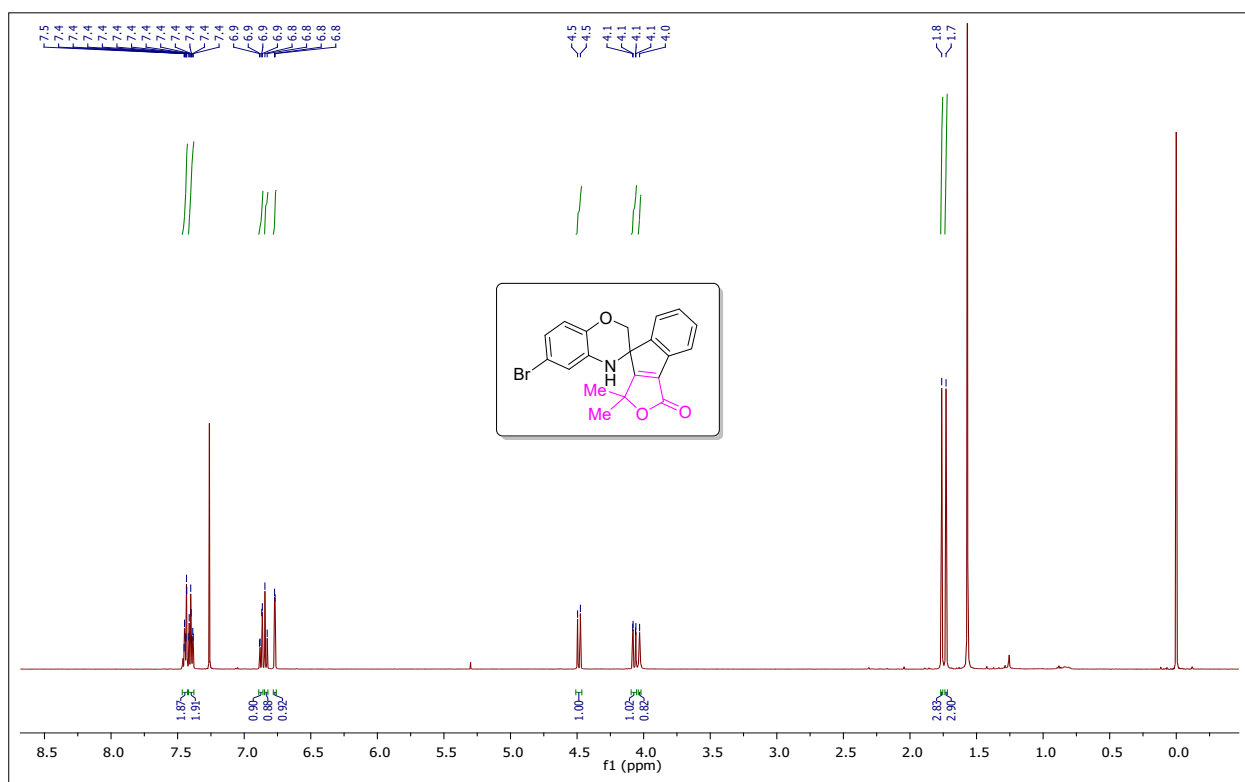

**$^{13}\text{C}\{^1\text{H}\}$  NMR (125 MHz,  $\text{CDCl}_3$ ) spectrum of compound **3k****

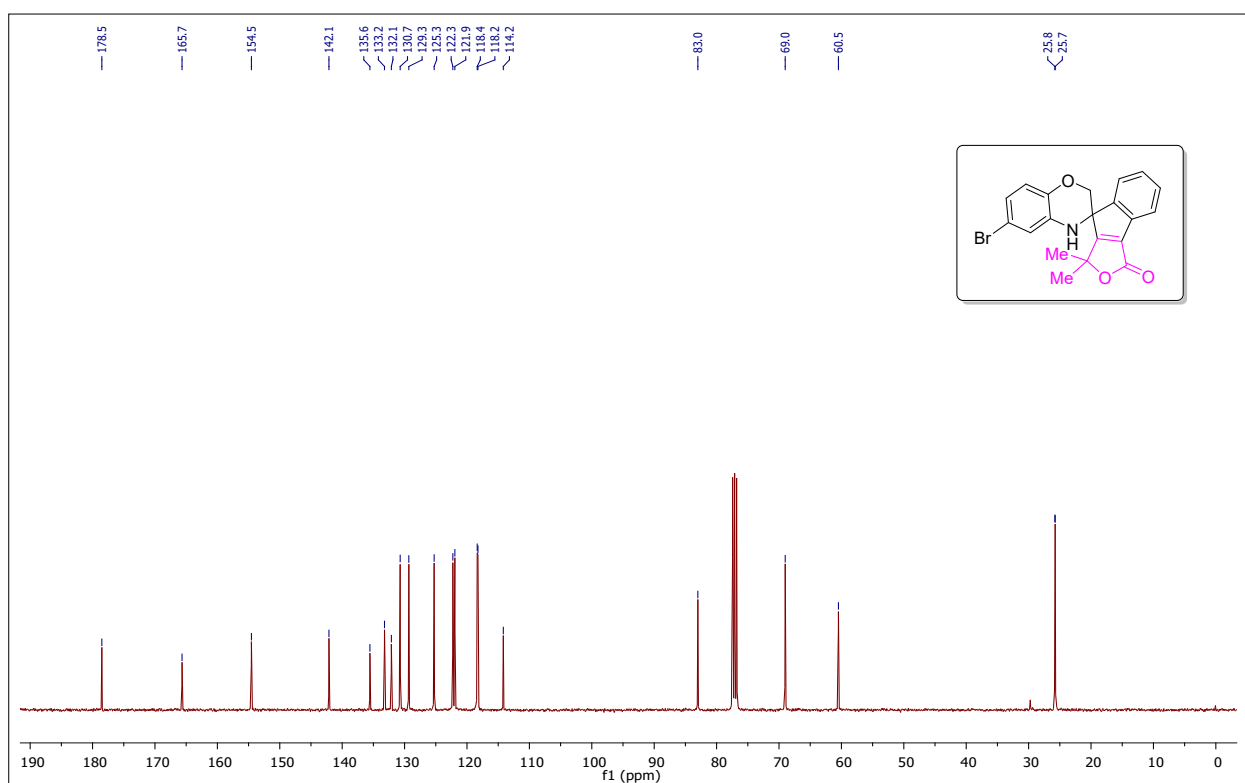

**$^1\text{H}$  NMR (400 MHz,  $\text{CDCl}_3$ ) spectrum of compound **31****

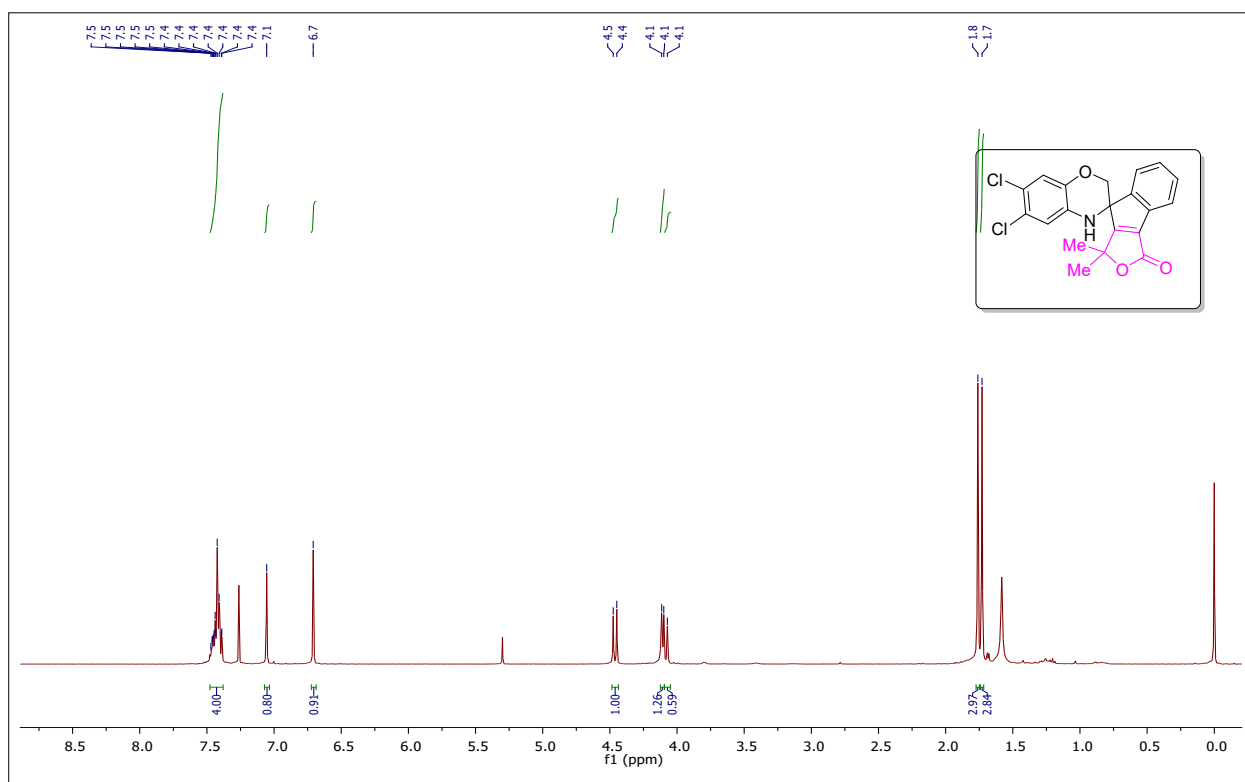

**$^{13}\text{C}\{^1\text{H}\}$  NMR (100MHz,  $\text{CDCl}_3$ ) spectrum of compound **31****

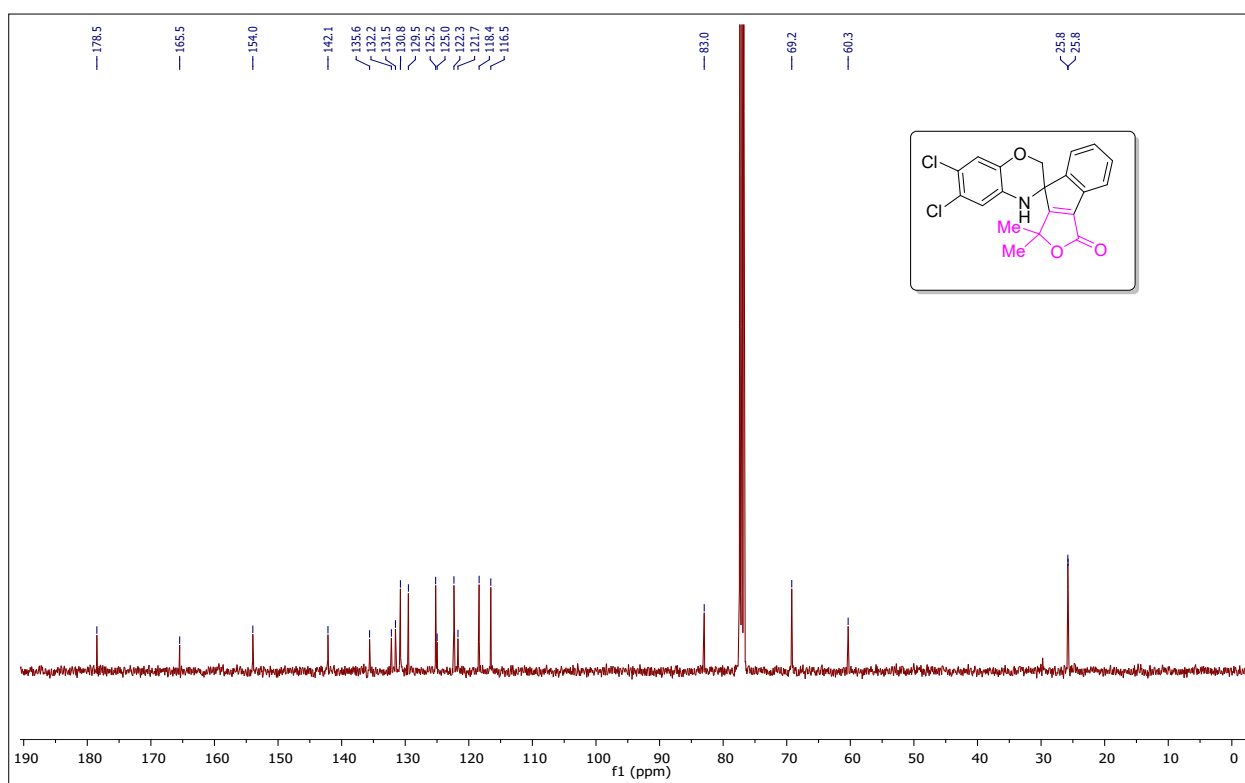

**$^1\text{H}$  NMR (400 MHz,  $\text{CDCl}_3$ ) spectrum of compound **3m****

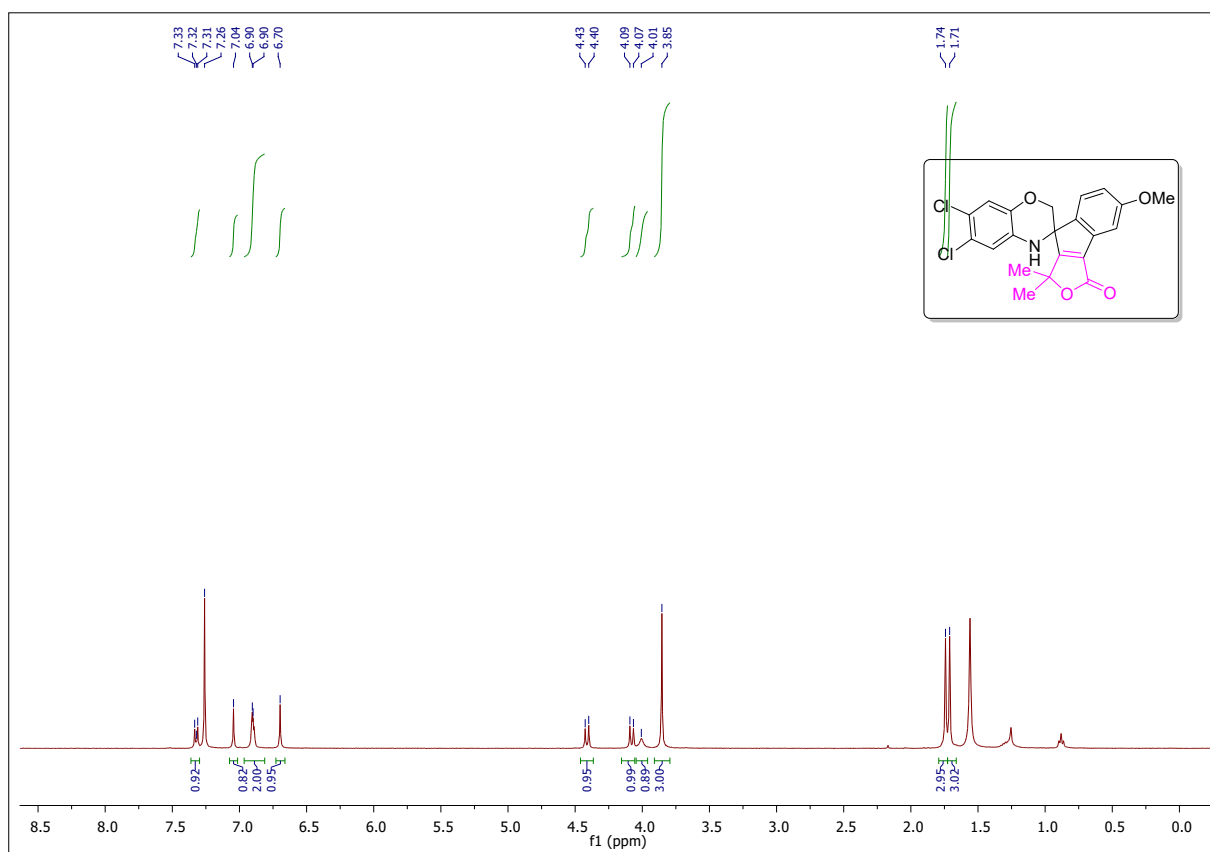

**$^{13}\text{C}\{^1\text{H}\}$  NMR (100 MHz,  $\text{CDCl}_3$ ) spectrum of compound **3m****

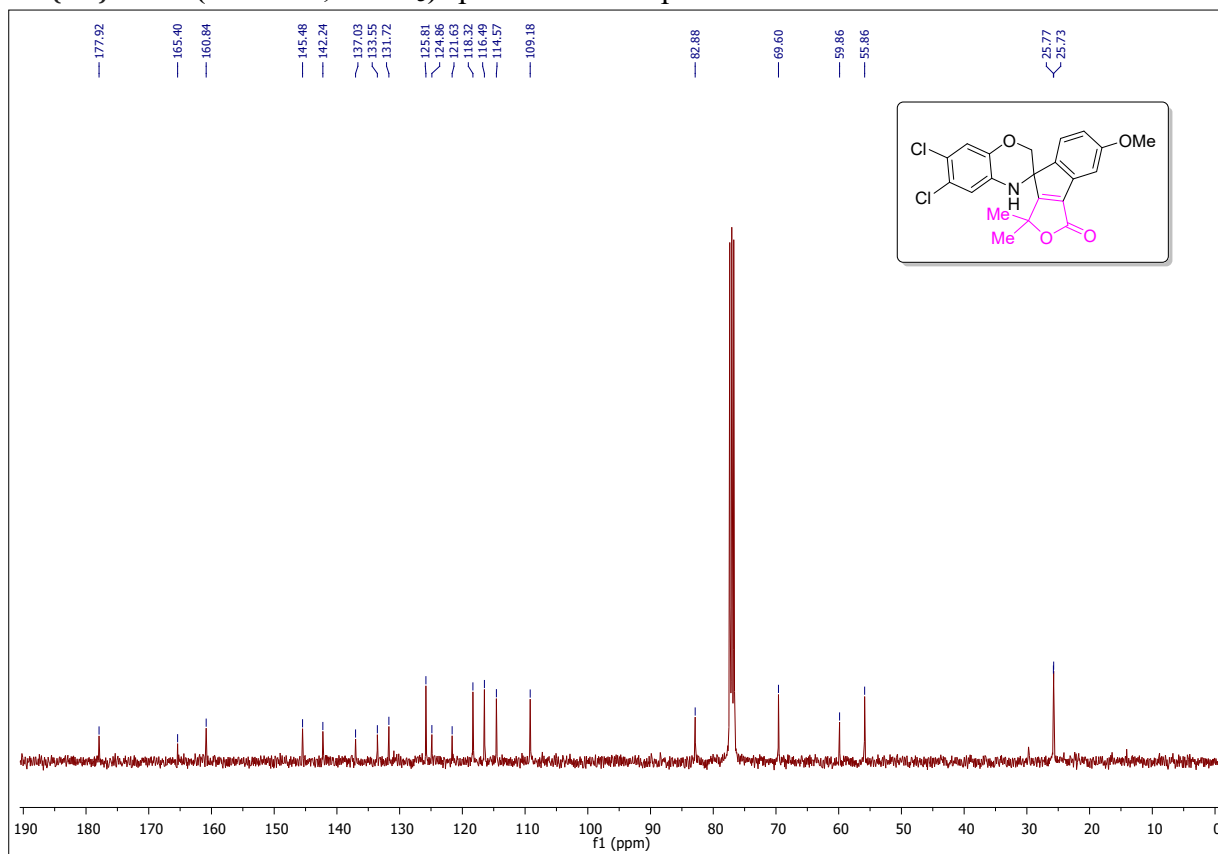

**$^1\text{H}$  NMR (400 MHz,  $\text{CDCl}_3$ ) spectrum of compound **3n****

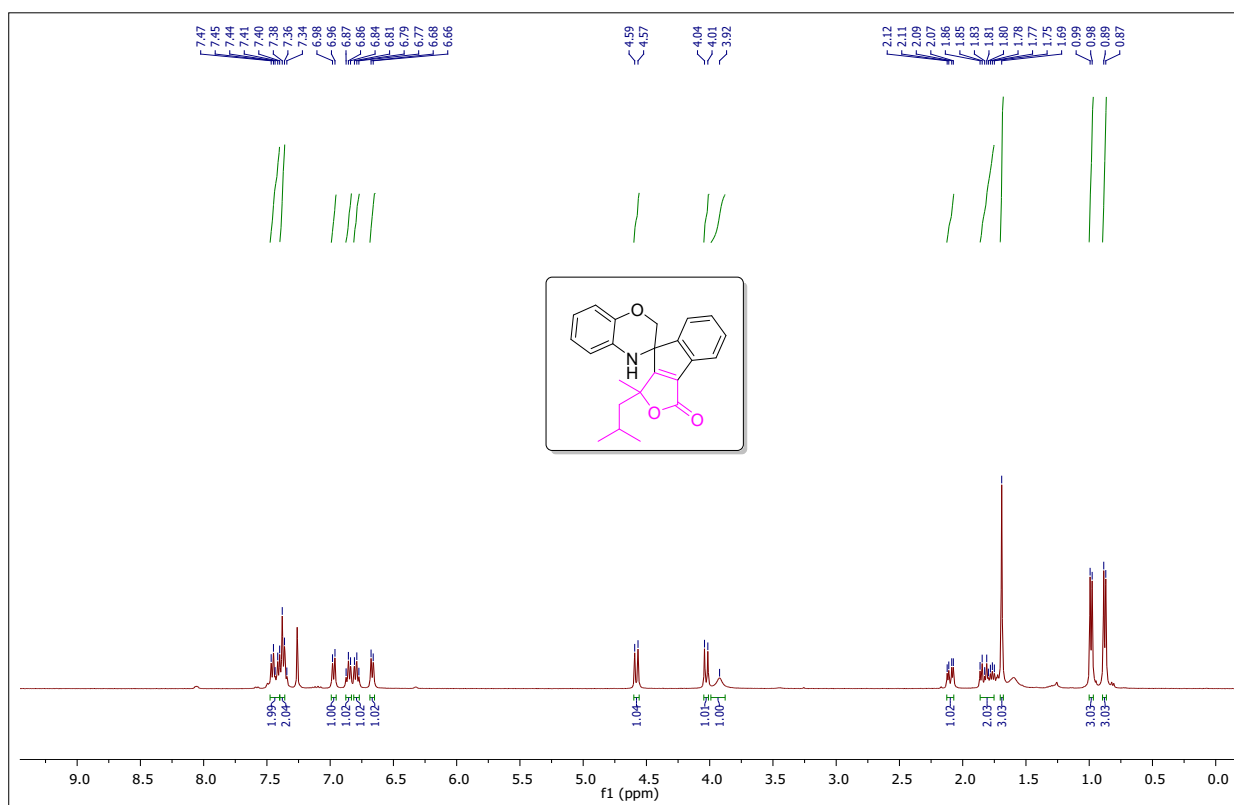

**$^{13}\text{C}\{^1\text{H}\}$  NMR (100MHz,  $\text{CDCl}_3$ ) spectrum of compound **3n****

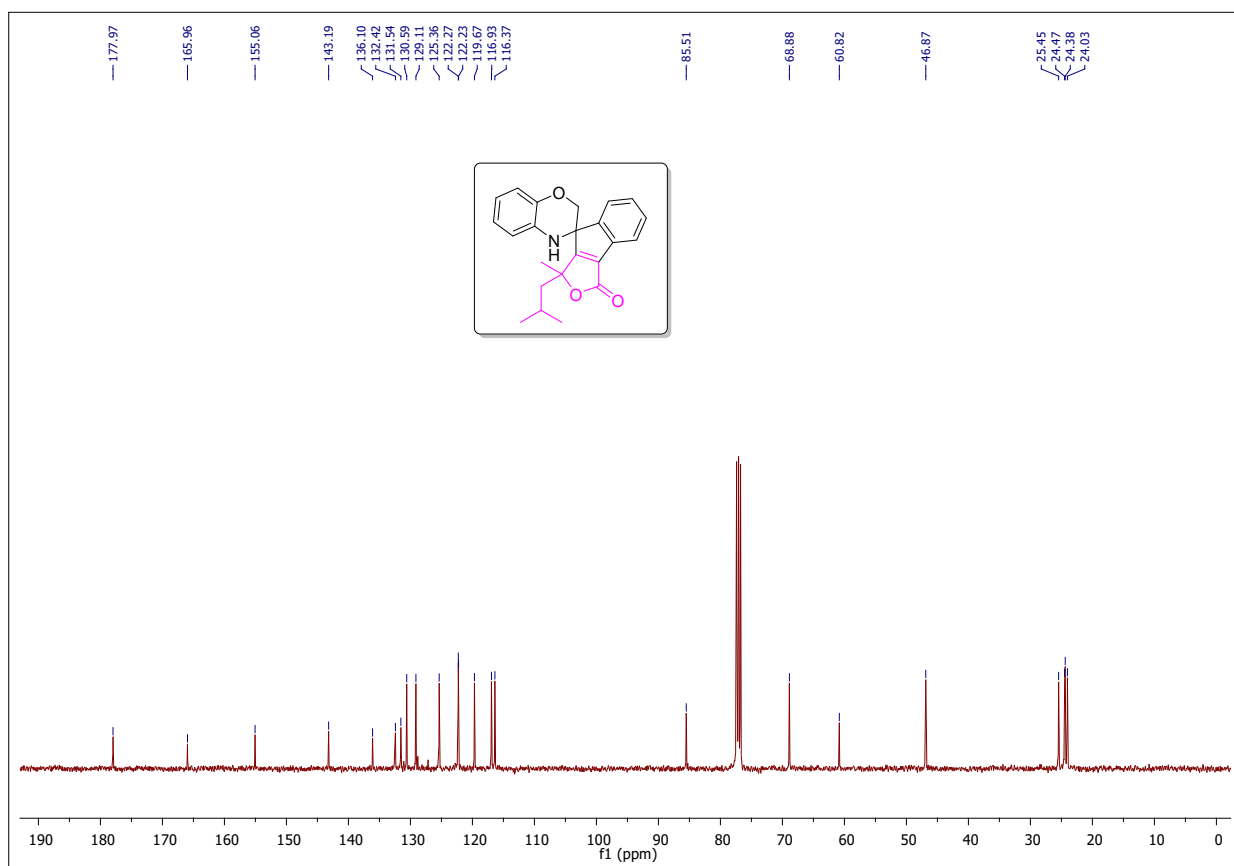





**$^1\text{H}$  NMR (400 MHz,  $\text{CDCl}_3$ ) spectrum of compound **3q****

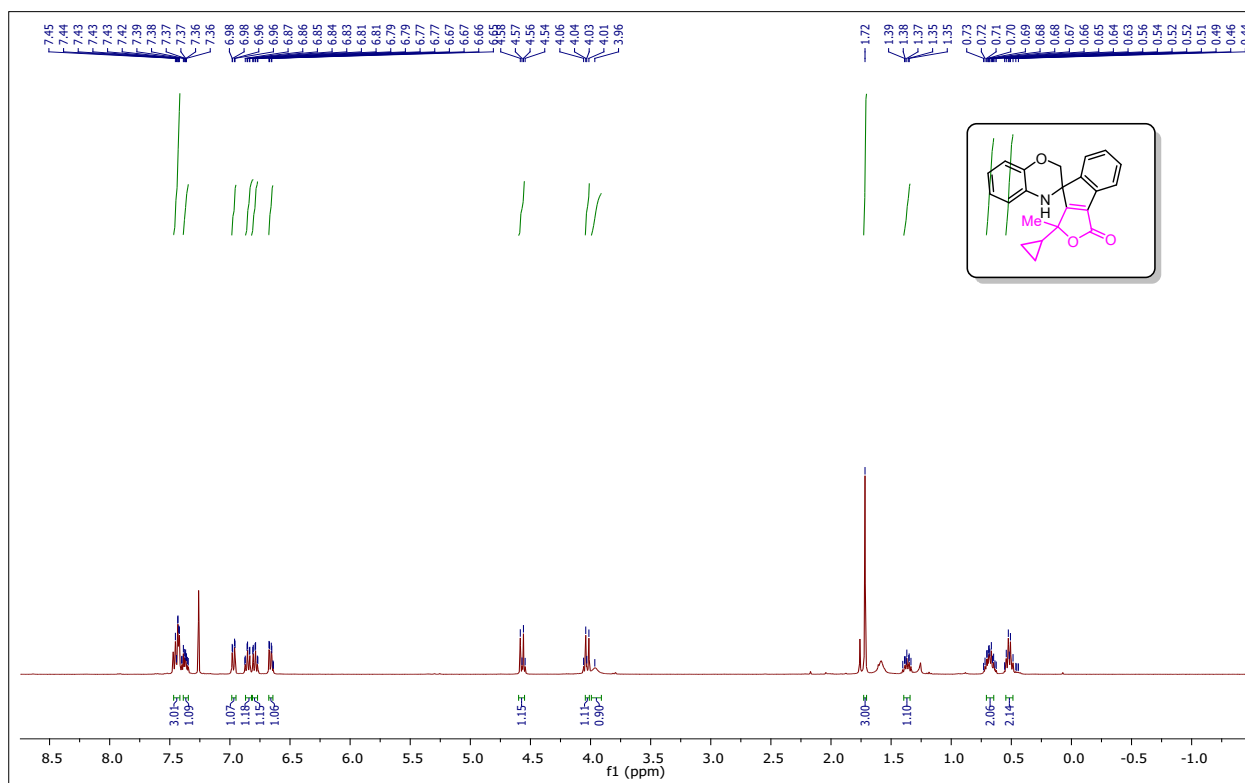

**$^{13}\text{C}\{^1\text{H}\}$  NMR (100MHz,  $\text{CDCl}_3$ ) spectrum of compound **3q****

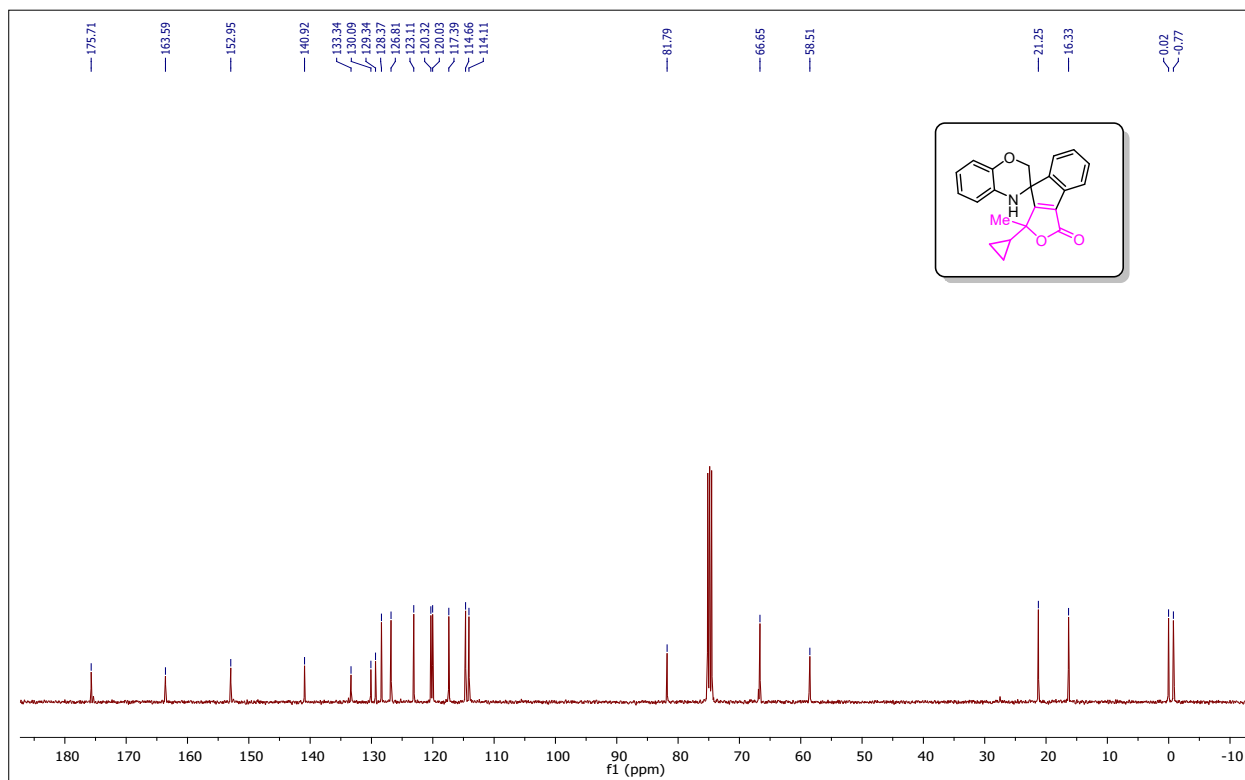

**$^1\text{H}$  NMR (400 MHz,  $\text{CDCl}_3$ ) spectrum of compound **3r****

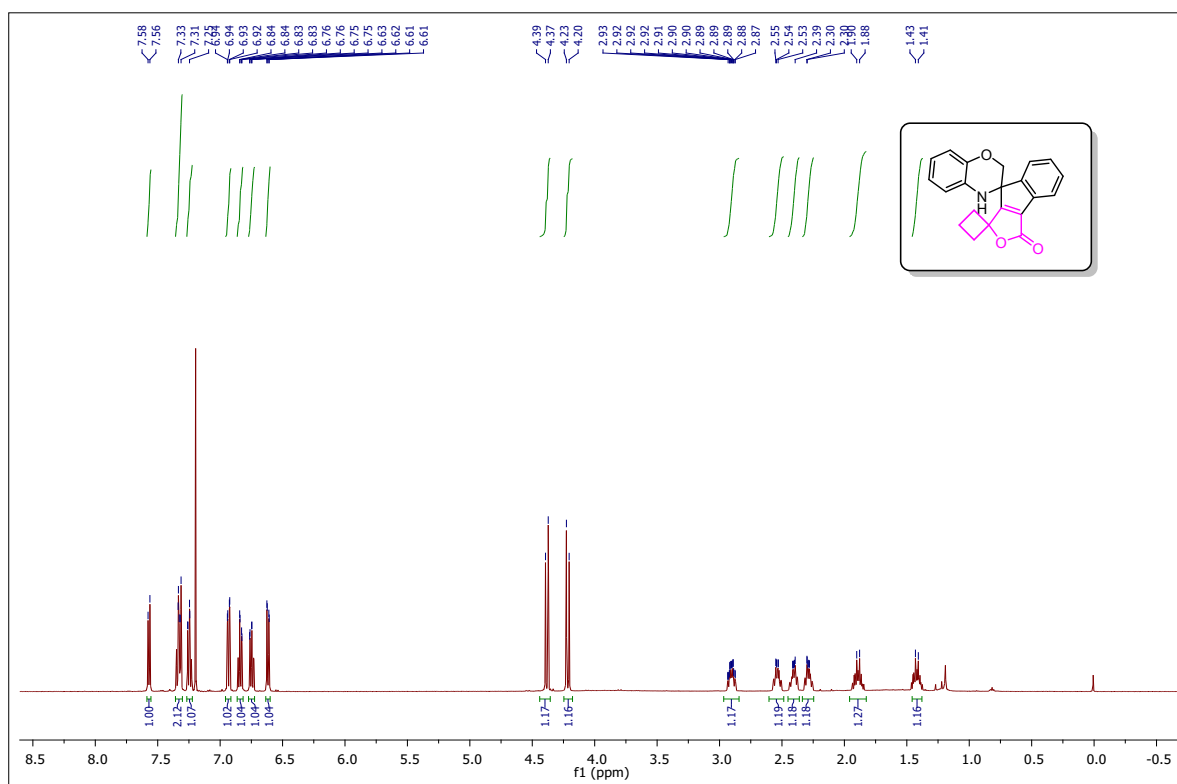

**$^{13}\text{C}\{^1\text{H}\}$  NMR (100MHz,  $\text{CDCl}_3$ ) spectrum of compound **3r****

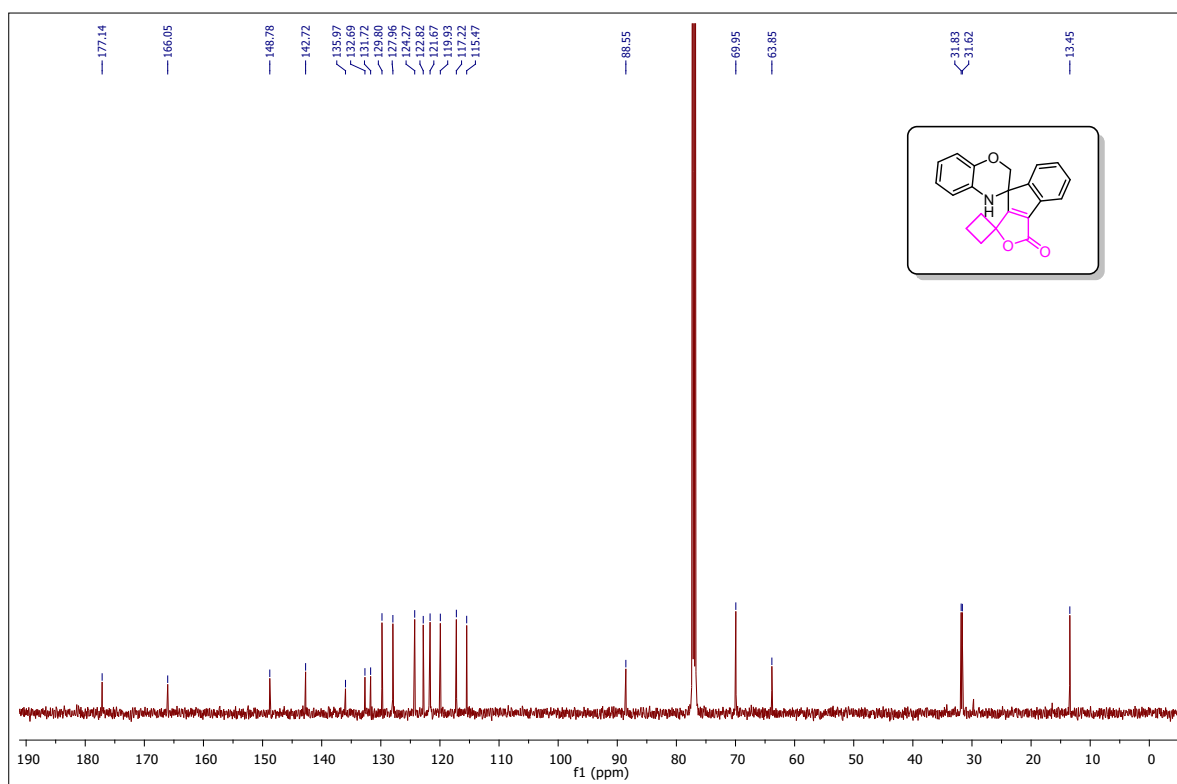

**<sup>1</sup>H NMR (400 MHz, CDCl<sub>3</sub>) spectrum of compound 5a**

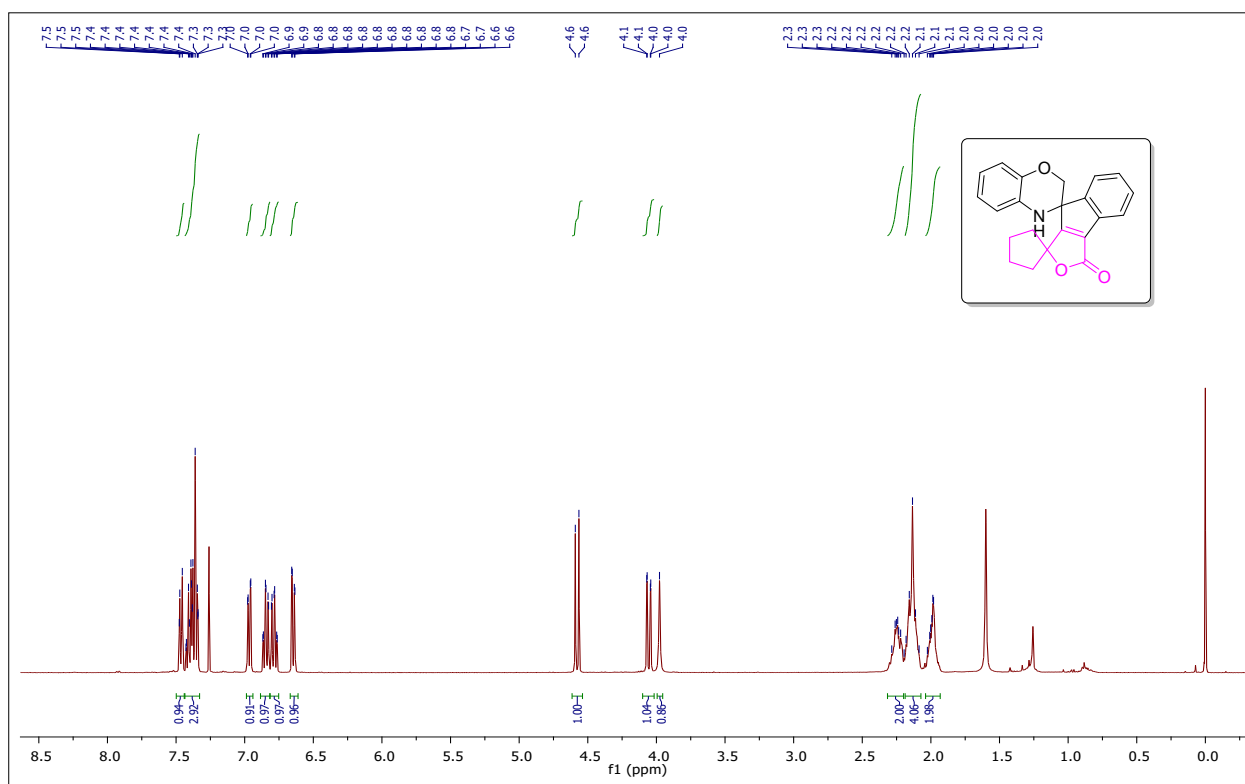

**<sup>13</sup>C{<sup>1</sup>H} NMR (100MHz, CDCl<sub>3</sub>) spectrum of compound 5a**

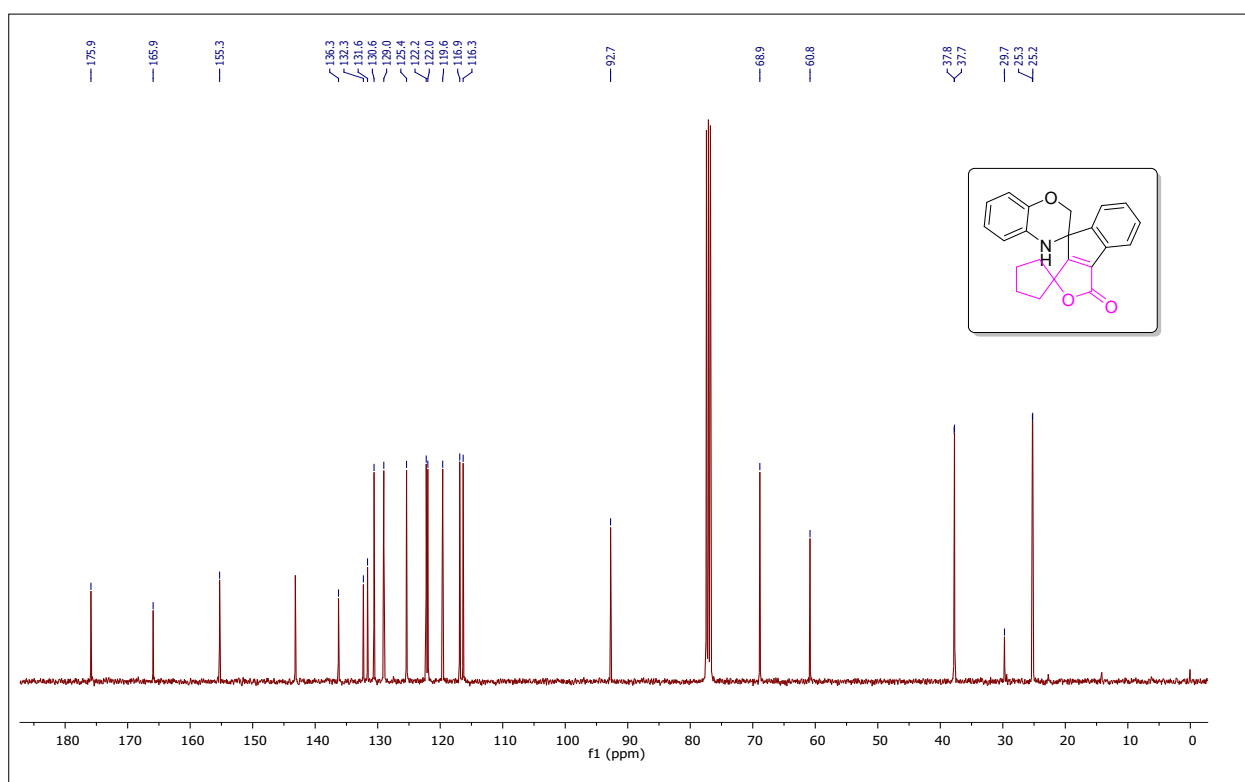

**$^1\text{H}$  NMR (400 MHz,  $\text{CDCl}_3$ ) spectrum of compound **5b****

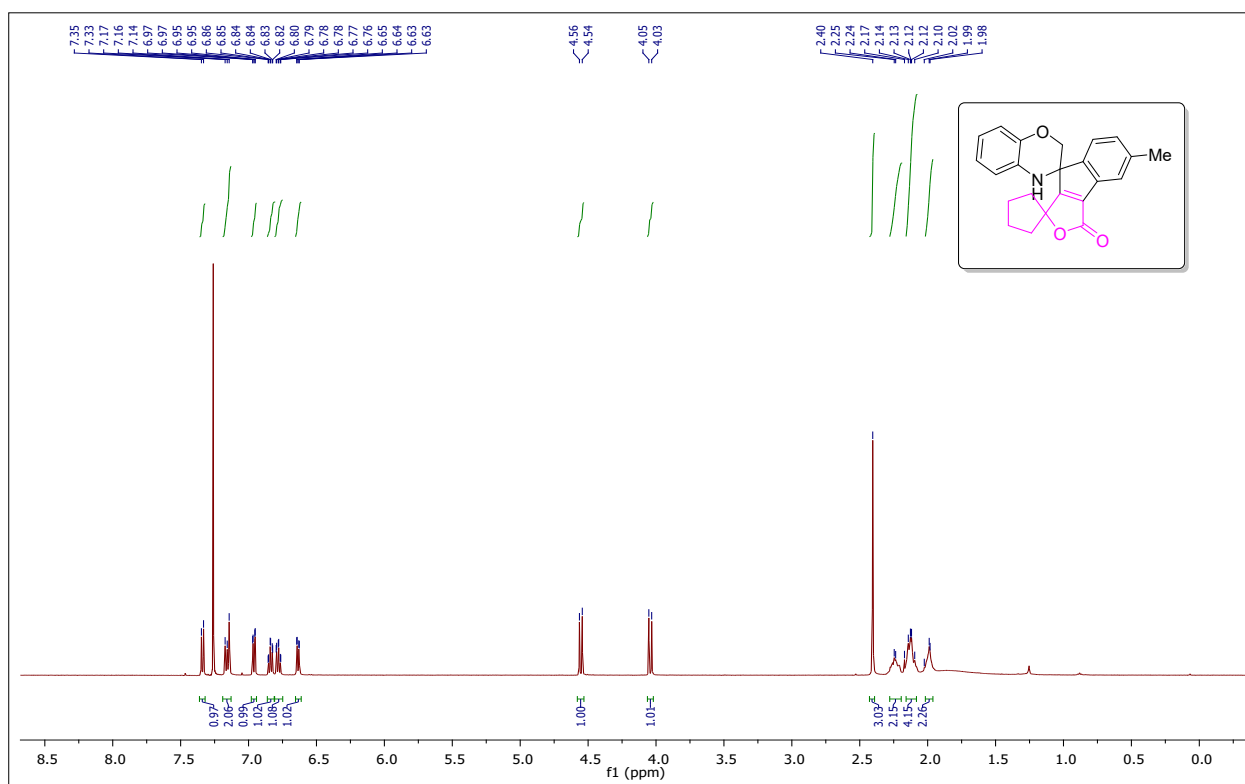

**$^{13}\text{C}\{^1\text{H}\}$  NMR (100 MHz,  $\text{CDCl}_3$ ) spectrum of compound **5b****

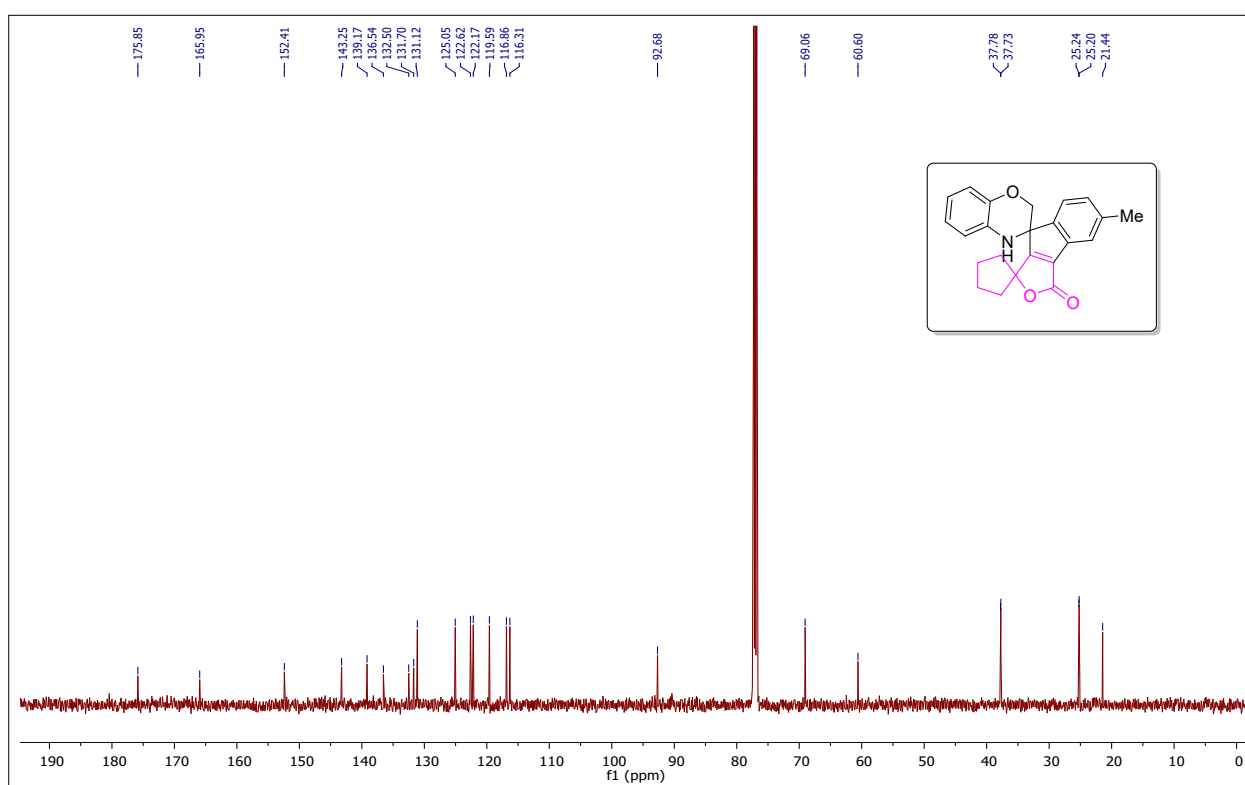

**$^1\text{H}$  NMR (400 MHz,  $\text{CDCl}_3$ ) spectrum of compound 5c**

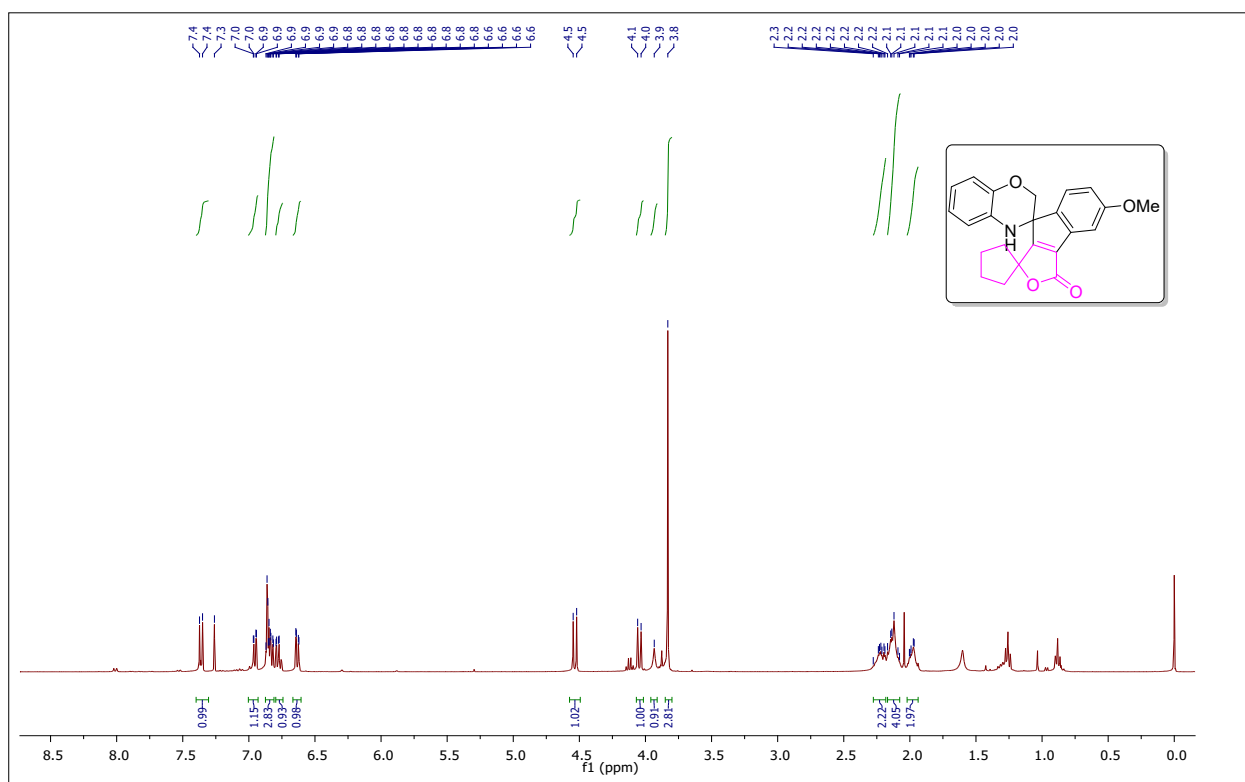

**$^{13}\text{C}\{^1\text{H}\}$  NMR (100MHz,  $\text{CDCl}_3$ ) spectrum of compound 5c**

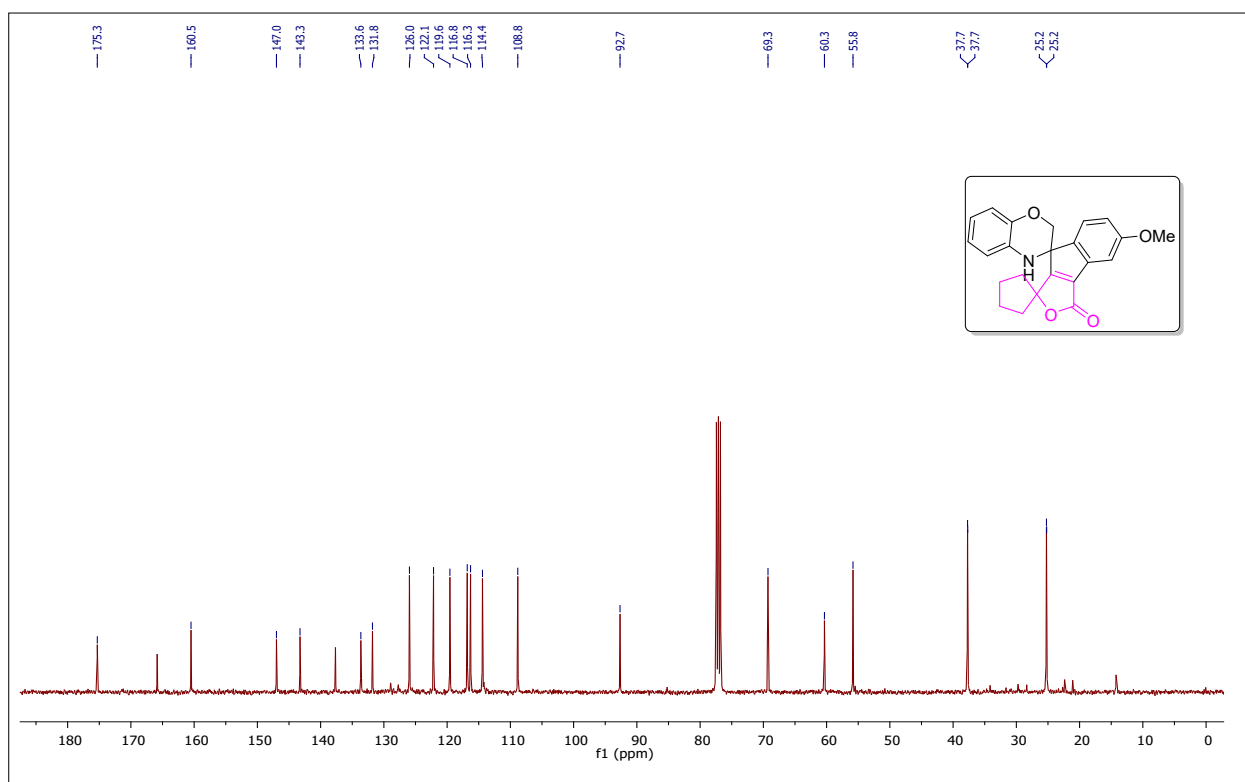







**$^1\text{H}$  NMR (400MHz,  $\text{CDCl}_3$ ) spectrum of compound **5f****

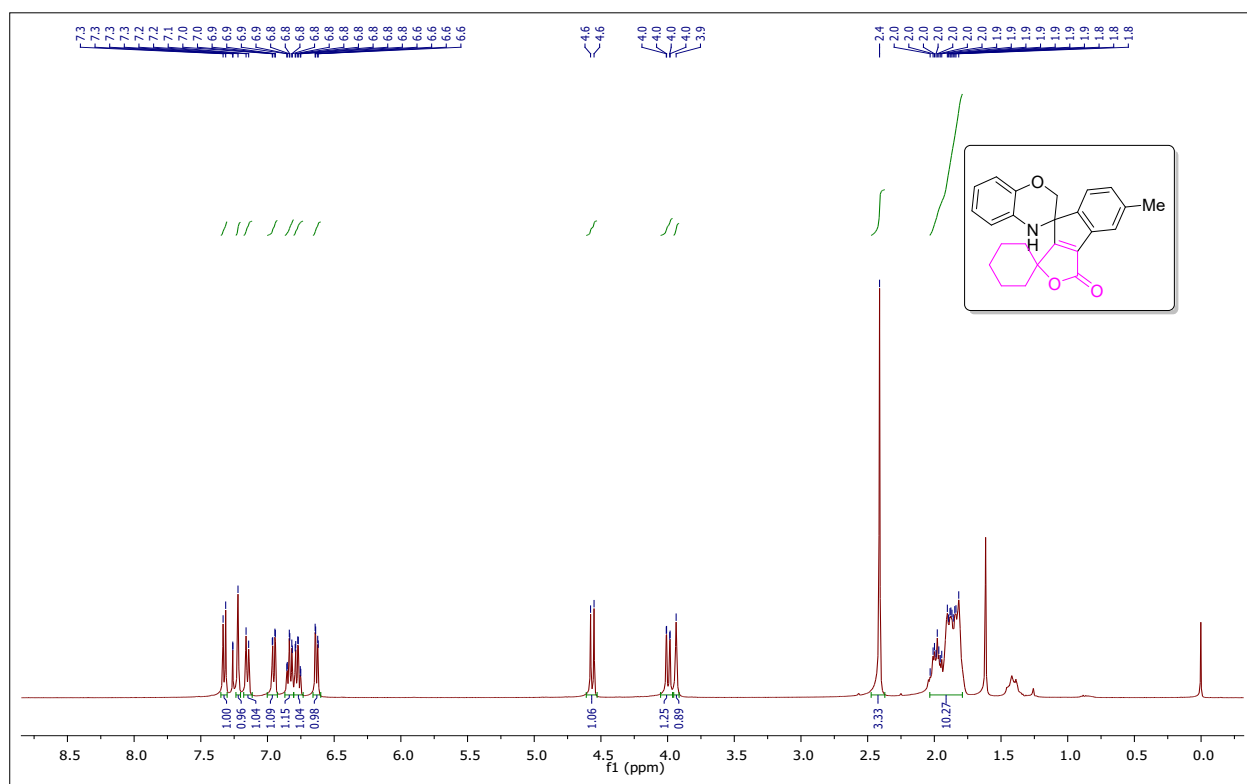

**$^{13}\text{C}\{^1\text{H}\}$  NMR (100MHz,  $\text{CDCl}_3$ ) spectrum of compound **5f****

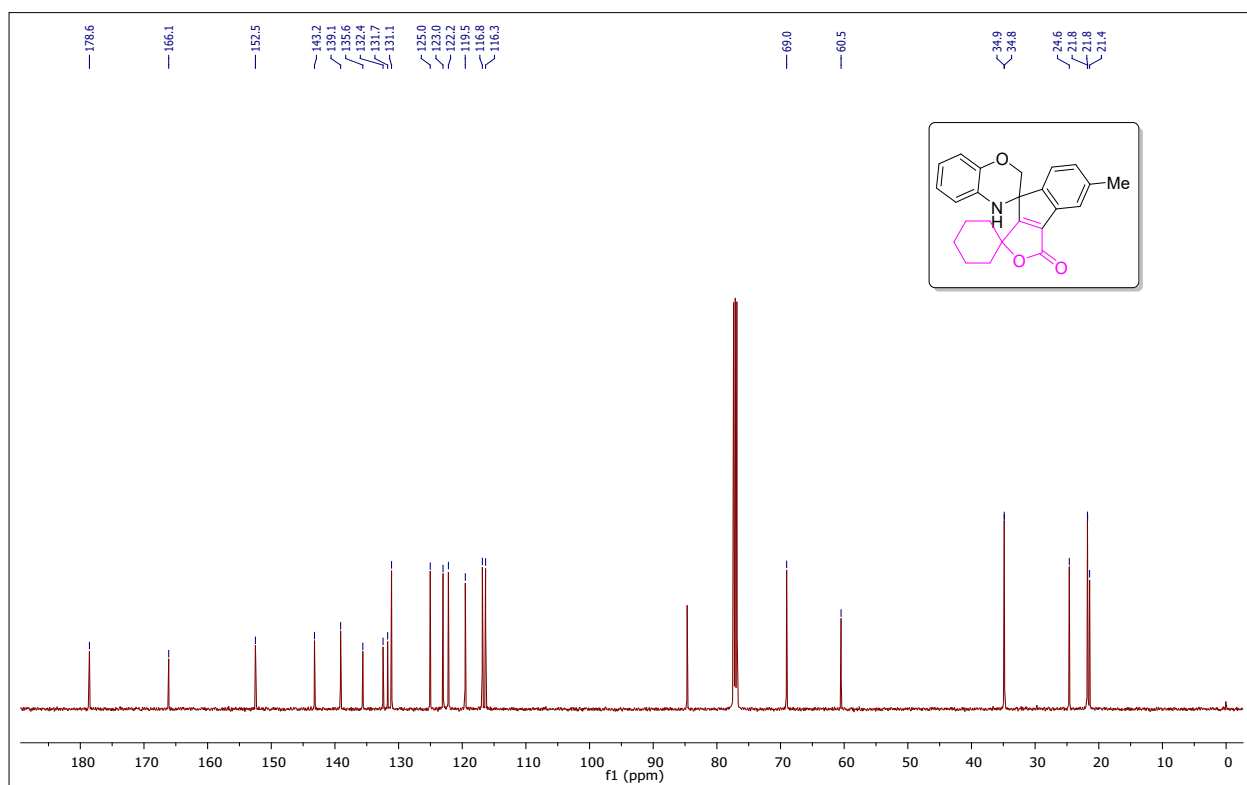

**$^1\text{H}$  NMR (400MHz,  $\text{CDCl}_3$ ) spectrum of compound **5g****

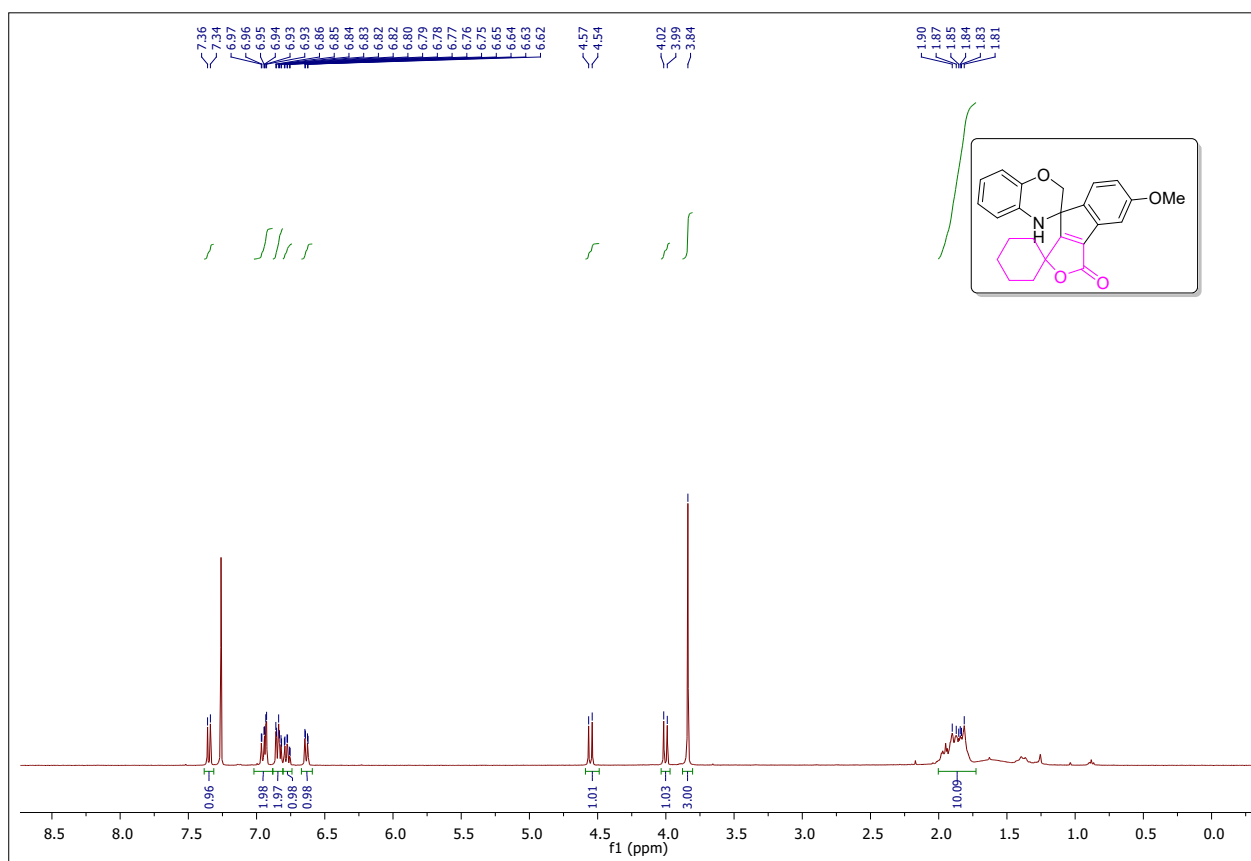

**$^{13}\text{C}\{^1\text{H}\}$  NMR (100MHz,  $\text{CDCl}_3$ ) spectrum of compound **5g****

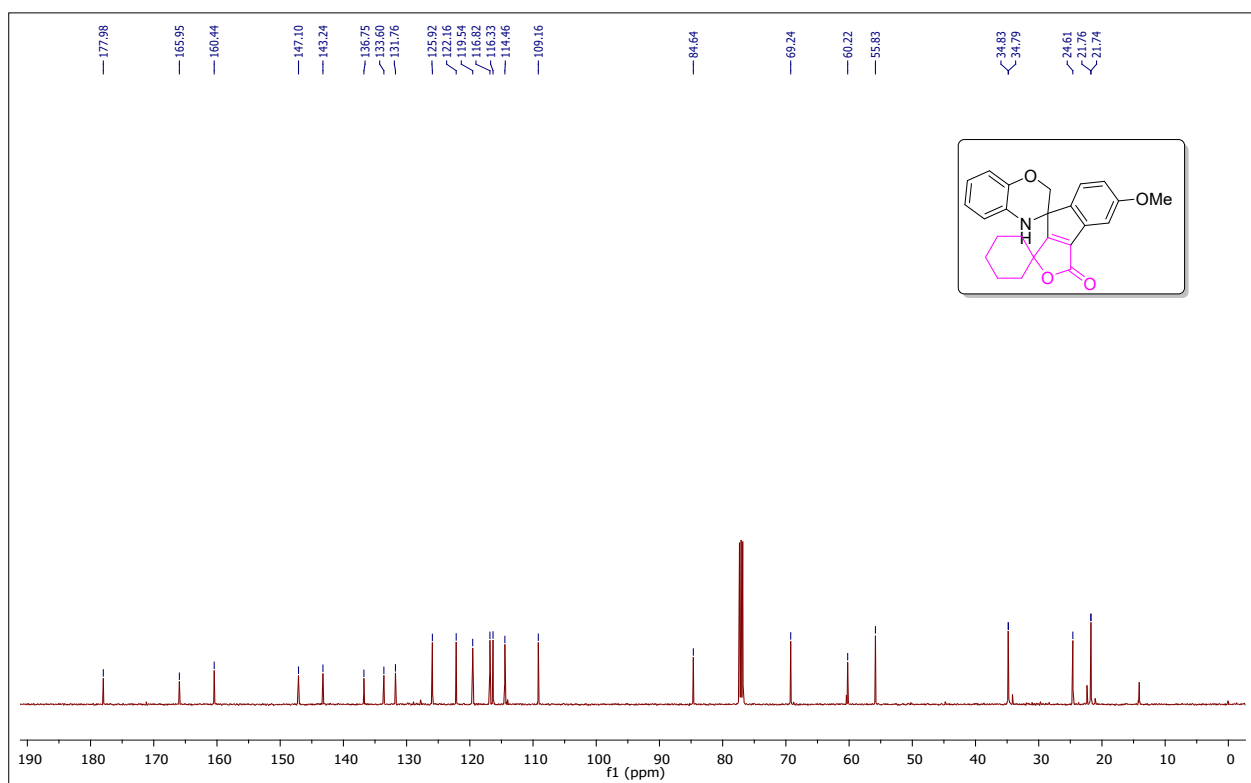

**$^1\text{H}$  NMR (400 MHz,  $\text{CDCl}_3$ ) spectrum of compound **5h****

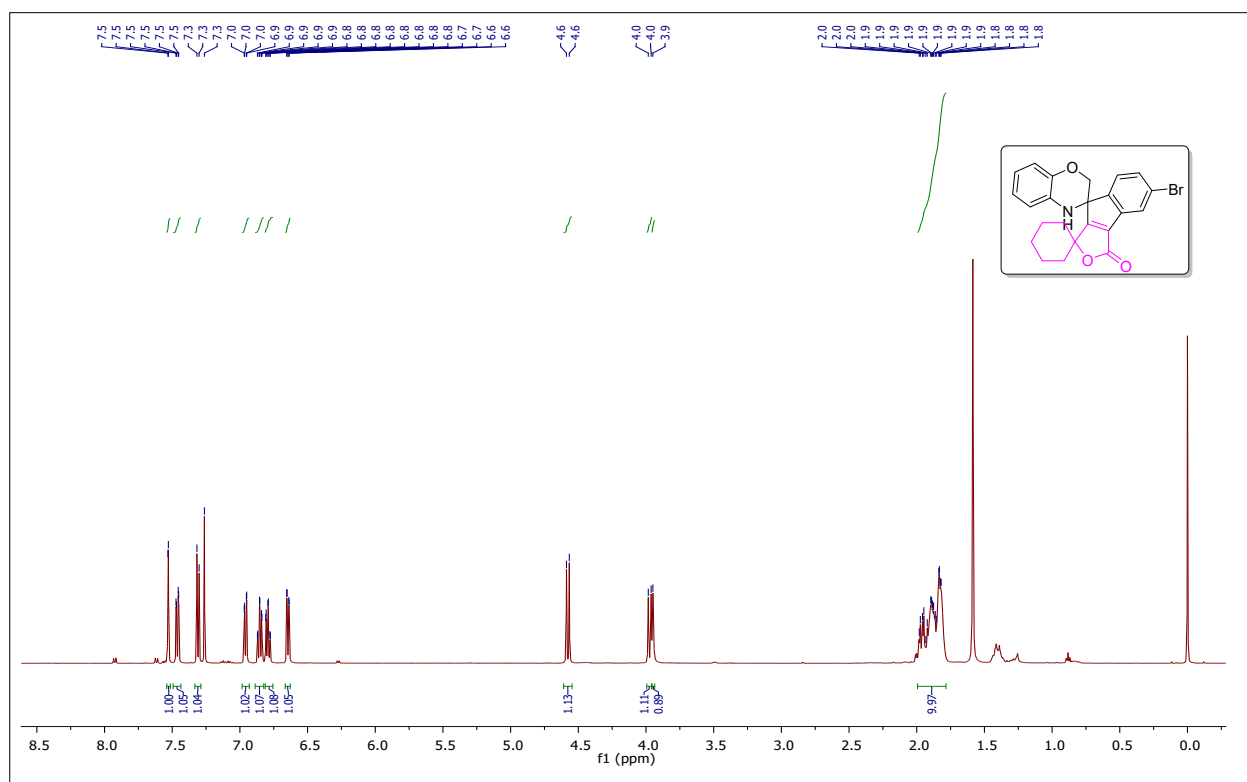

**$^{13}\text{C}\{^1\text{H}\}$  NMR (100MHz,  $\text{CDCl}_3$ ) spectrum of compound **5h****

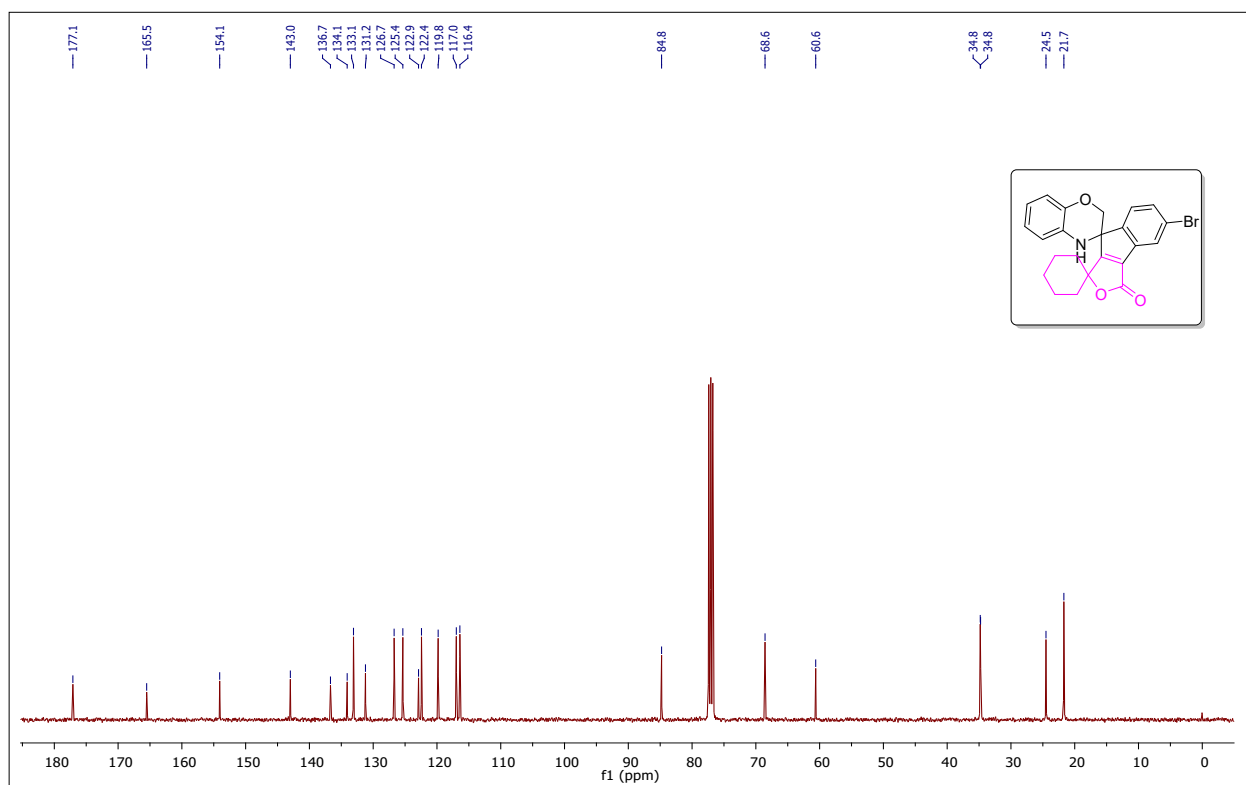

**$^1\text{H}$  NMR (500MHz,  $\text{CDCl}_3$ ) spectrum of compound 5i**

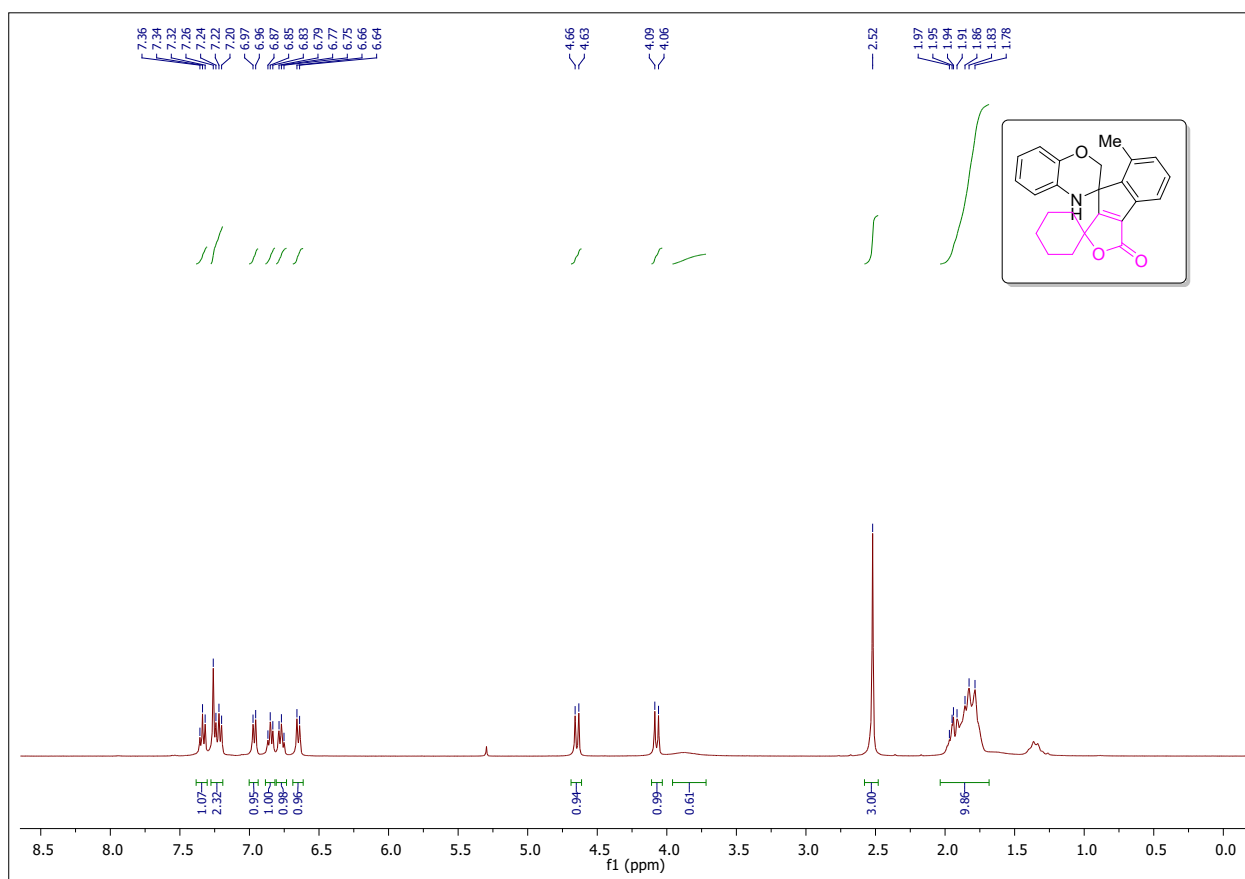

**$^{13}\text{C}\{^1\text{H}\}$  NMR (125MHz,  $\text{CDCl}_3$ ) spectrum of compound 5i**

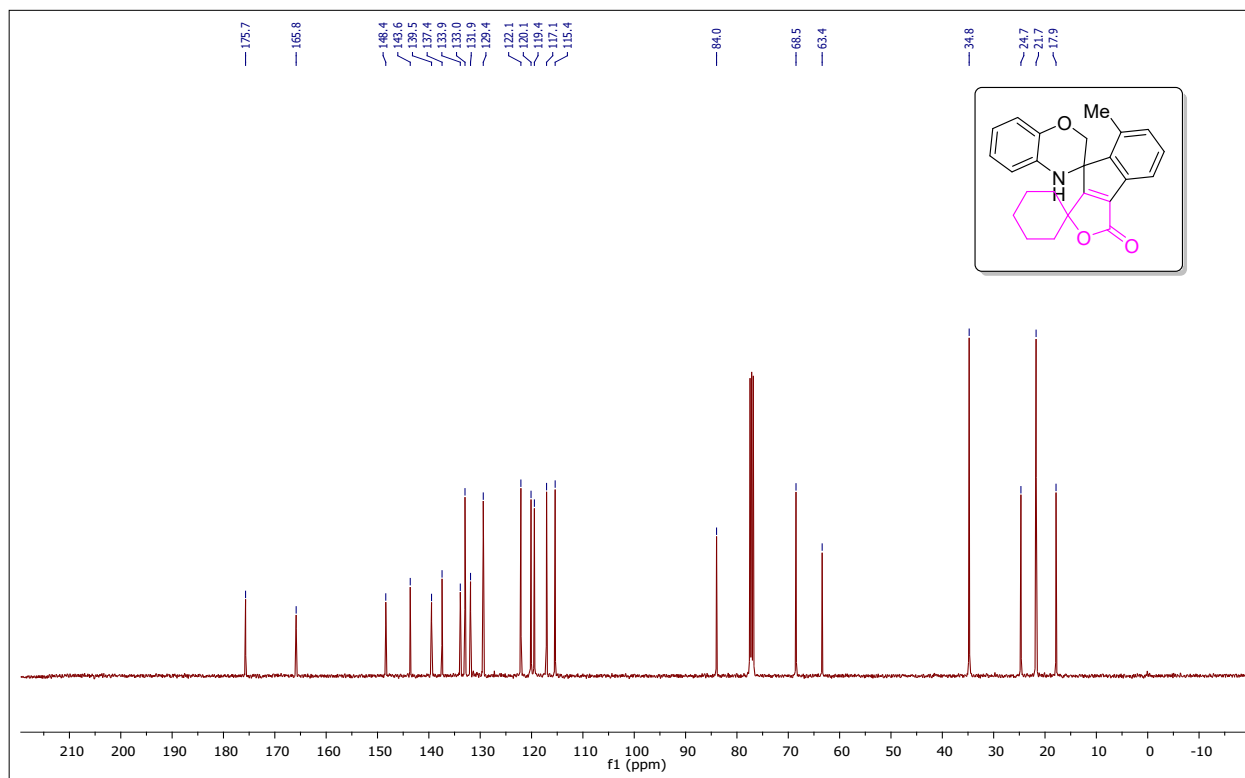

**$^1\text{H}$  NMR (400 MHz,  $\text{CDCl}_3$ ) spectrum of compound **5j****

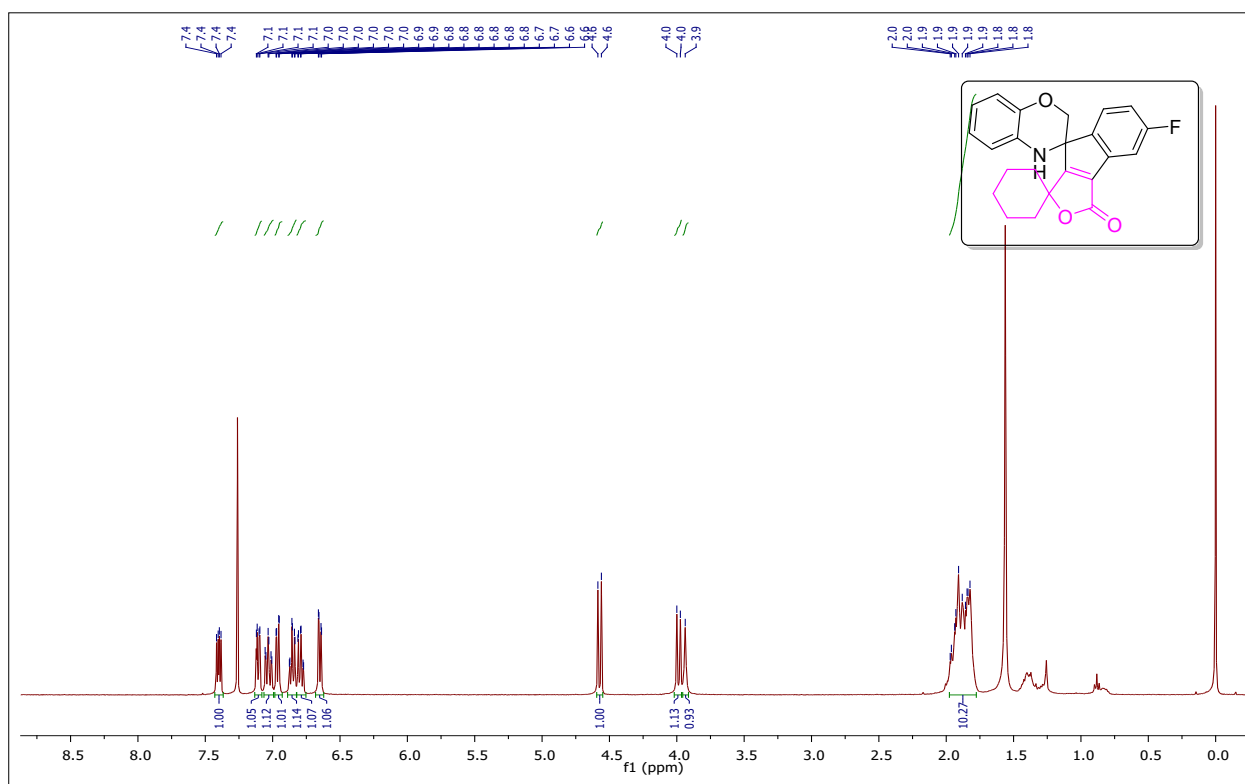

**$^{13}\text{C}\{^1\text{H}\}$  NMR (100MHz,  $\text{CDCl}_3$ ) spectrum of compound **5j****

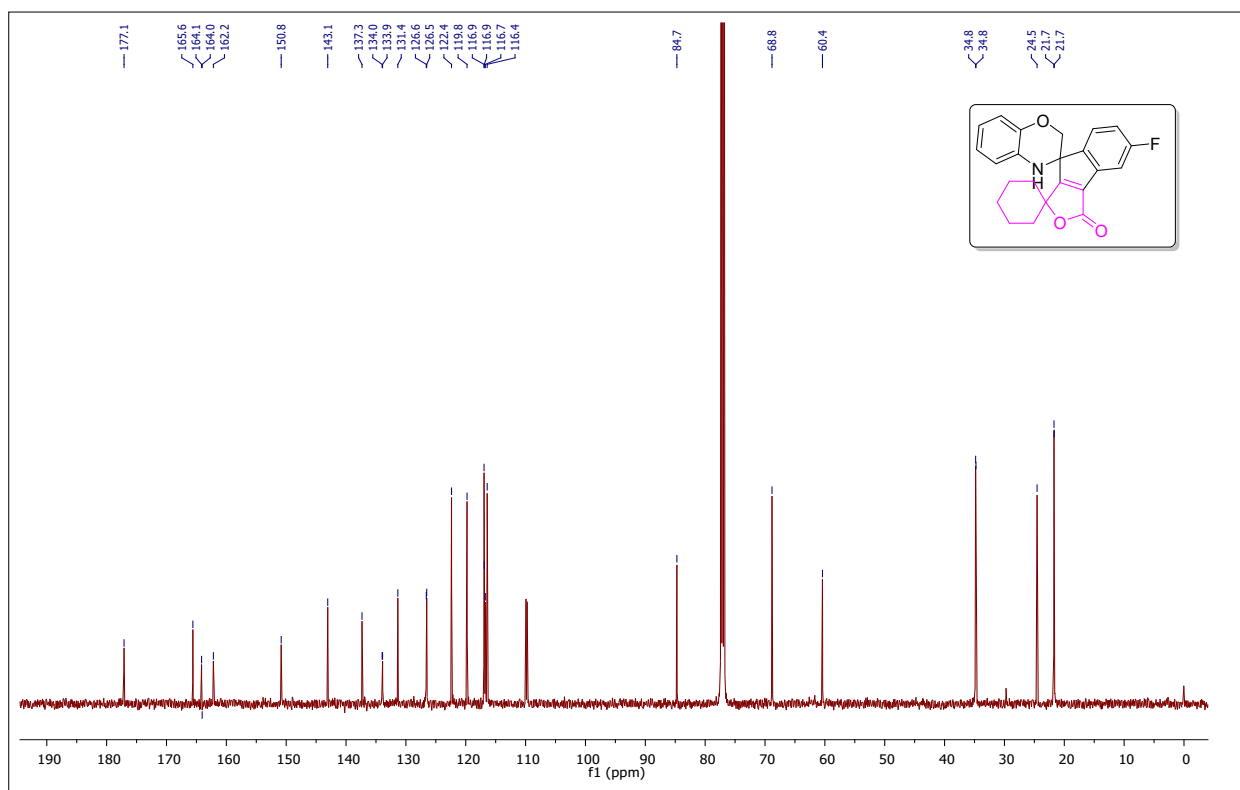

**F<sup>19</sup>NMR (400MHz,CDCl<sub>3</sub>) spectrum of compound 5j**

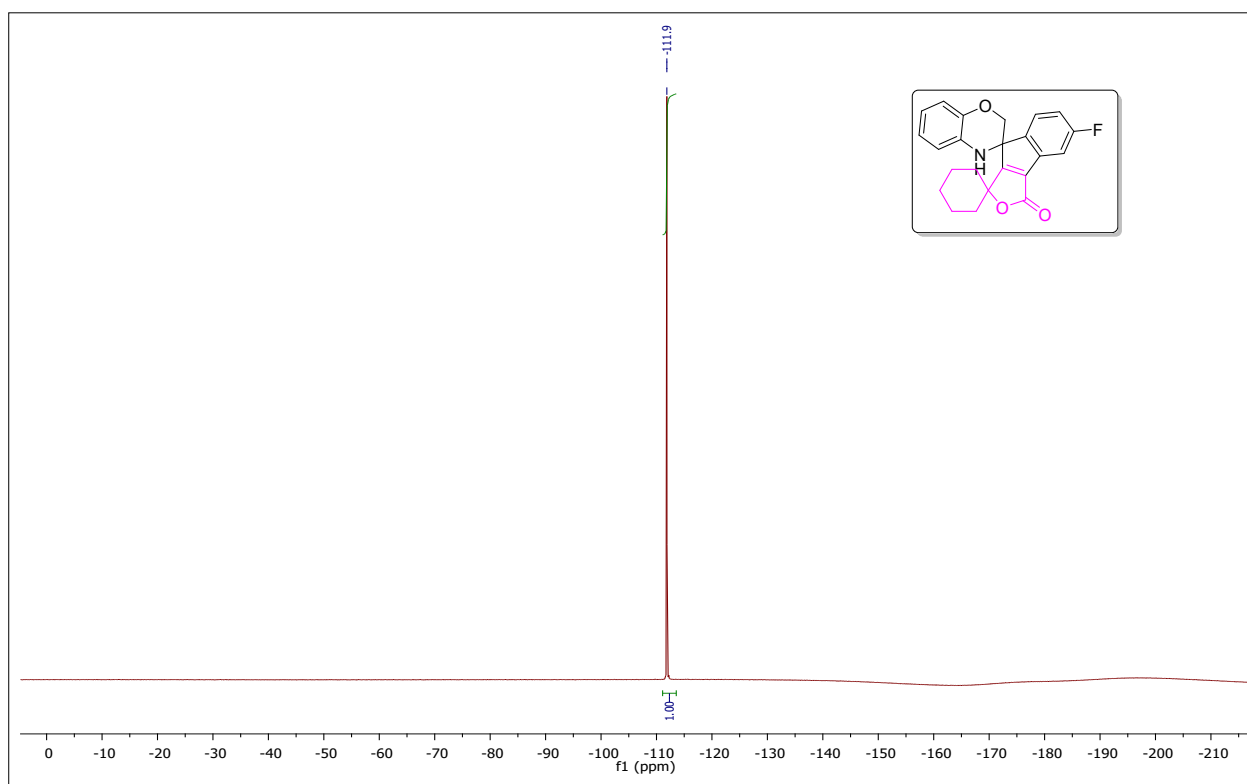

**$^1\text{H}$  NMR (400 MHz,  $\text{CDCl}_3$ ) spectrum of compound 5k**

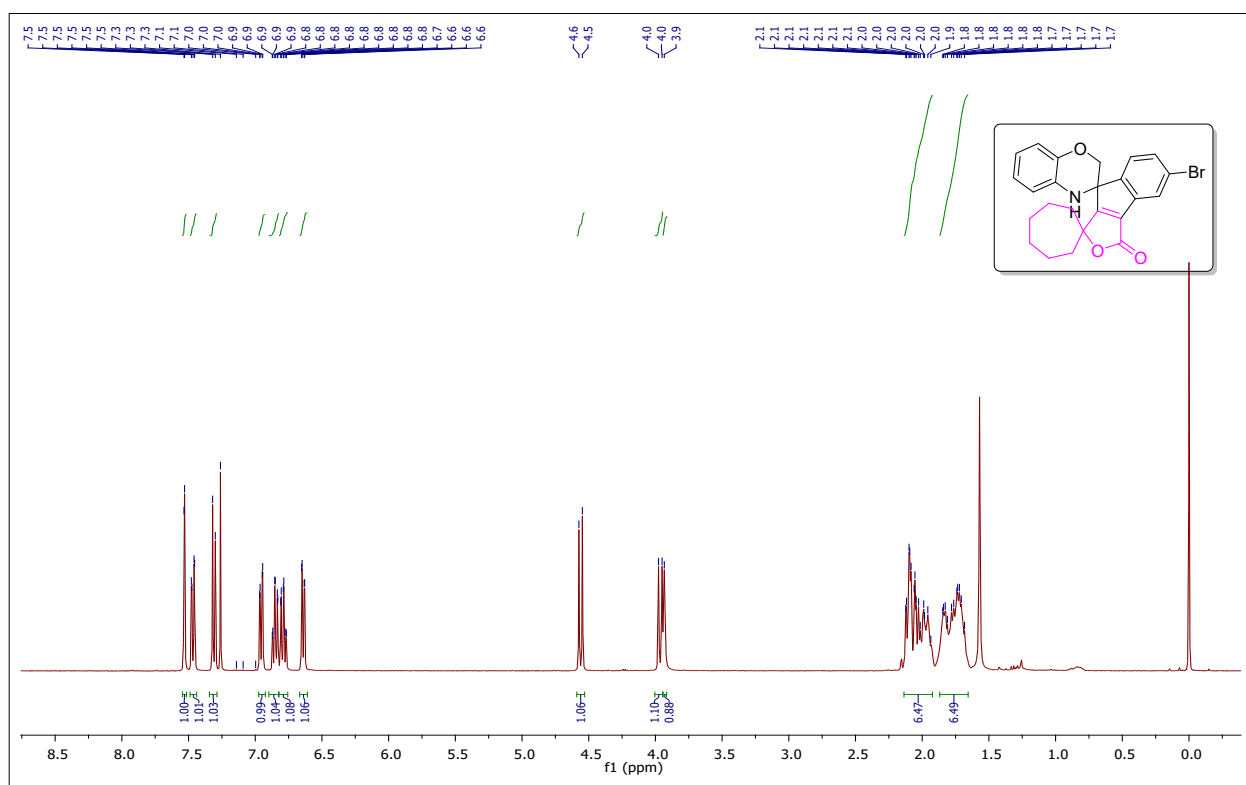

**$^{13}\text{C}\{^1\text{H}\}$  NMR (100MHz,  $\text{CDCl}_3$ ) spectrum of compound 5k**

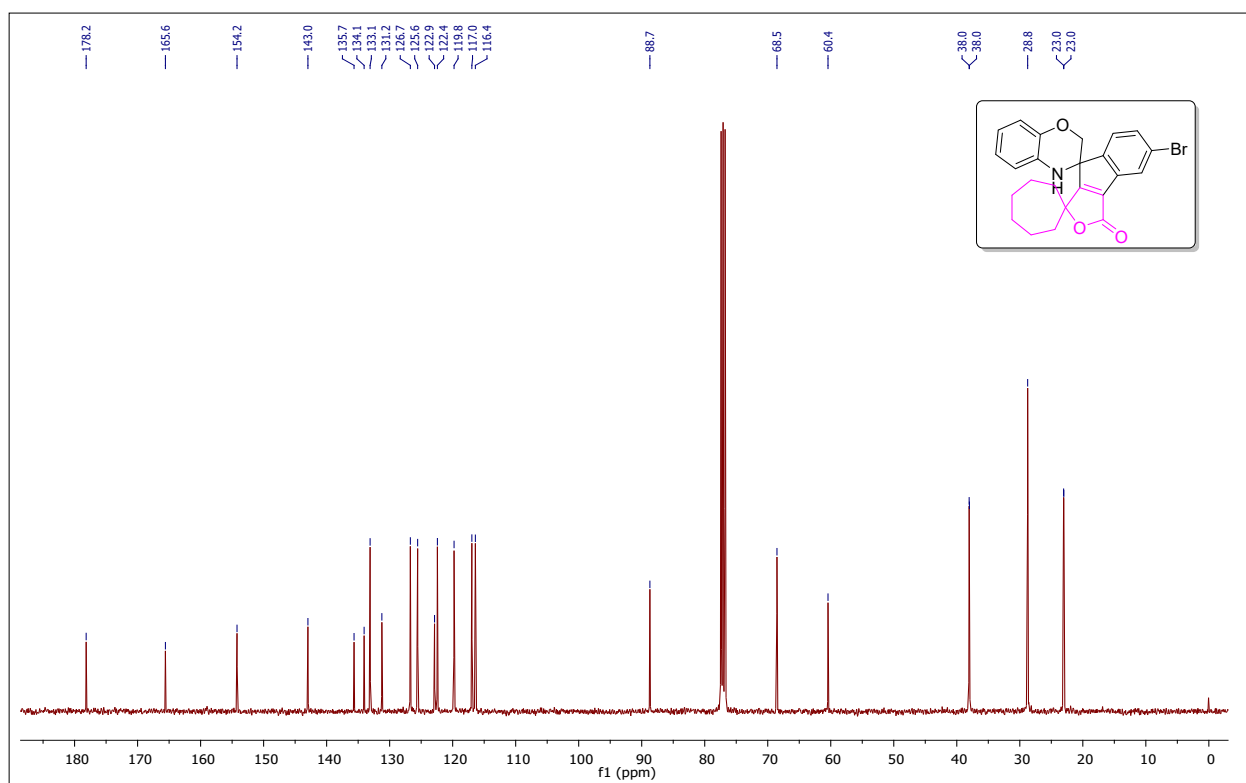

**$^1\text{H}$  NMR (400 MHz,  $\text{CDCl}_3$ ) spectrum of compound 51**

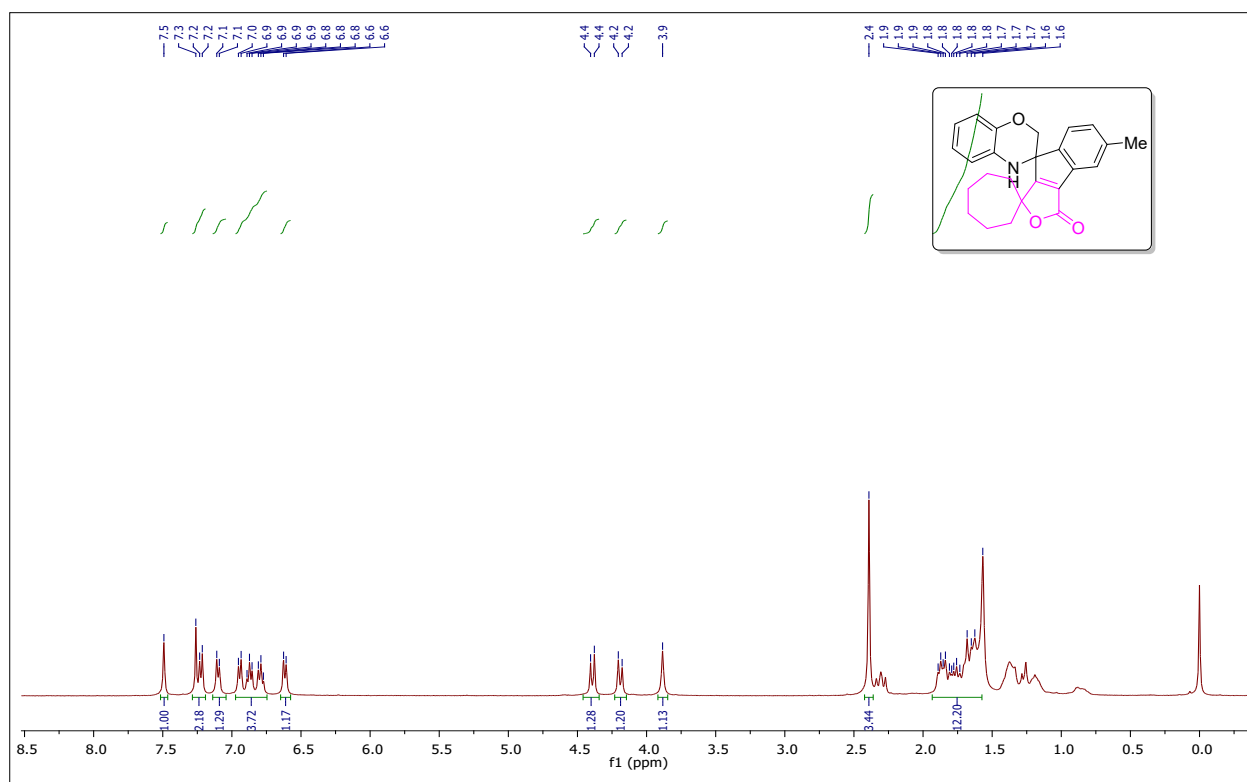

**$^{13}\text{C}\{^1\text{H}\}$  NMR (100MHz,  $\text{CDCl}_3$ ) spectrum of compound 51**

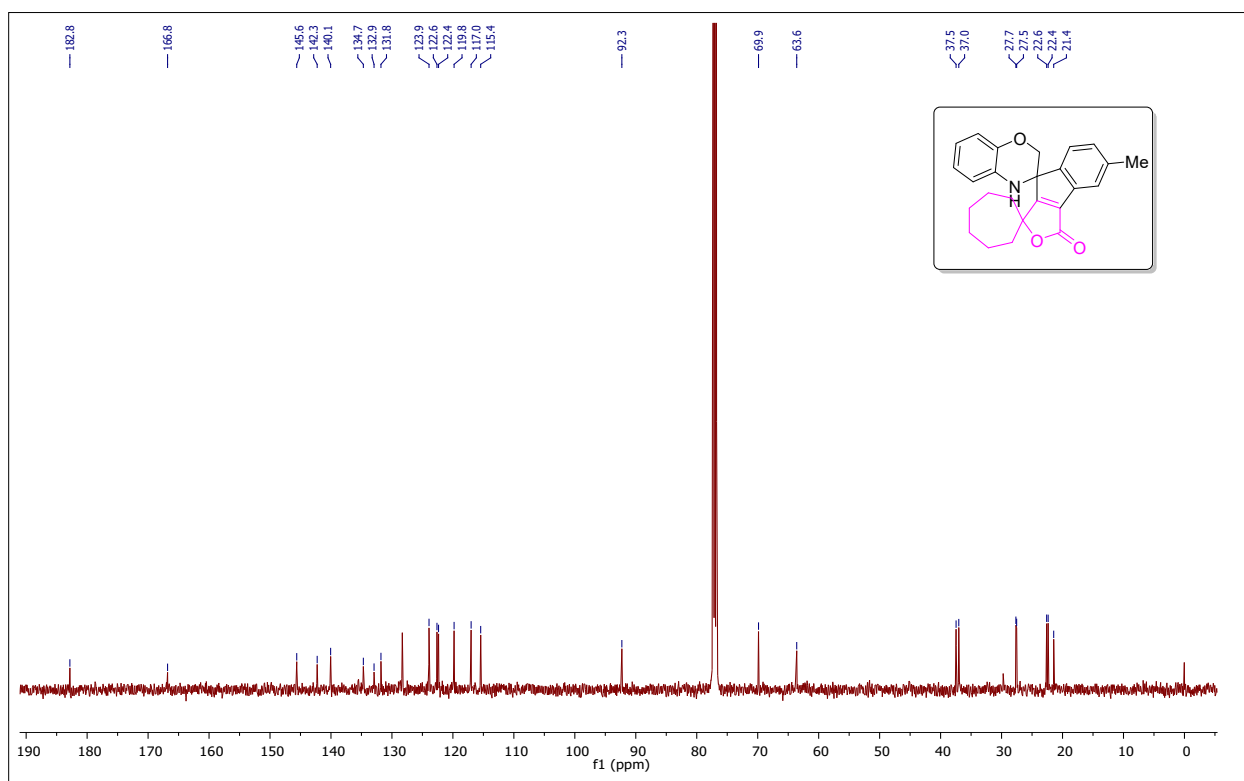



**$^1\text{H}$  NMR (400 MHz,  $\text{CDCl}_3$ ) spectrum of compound **5m****

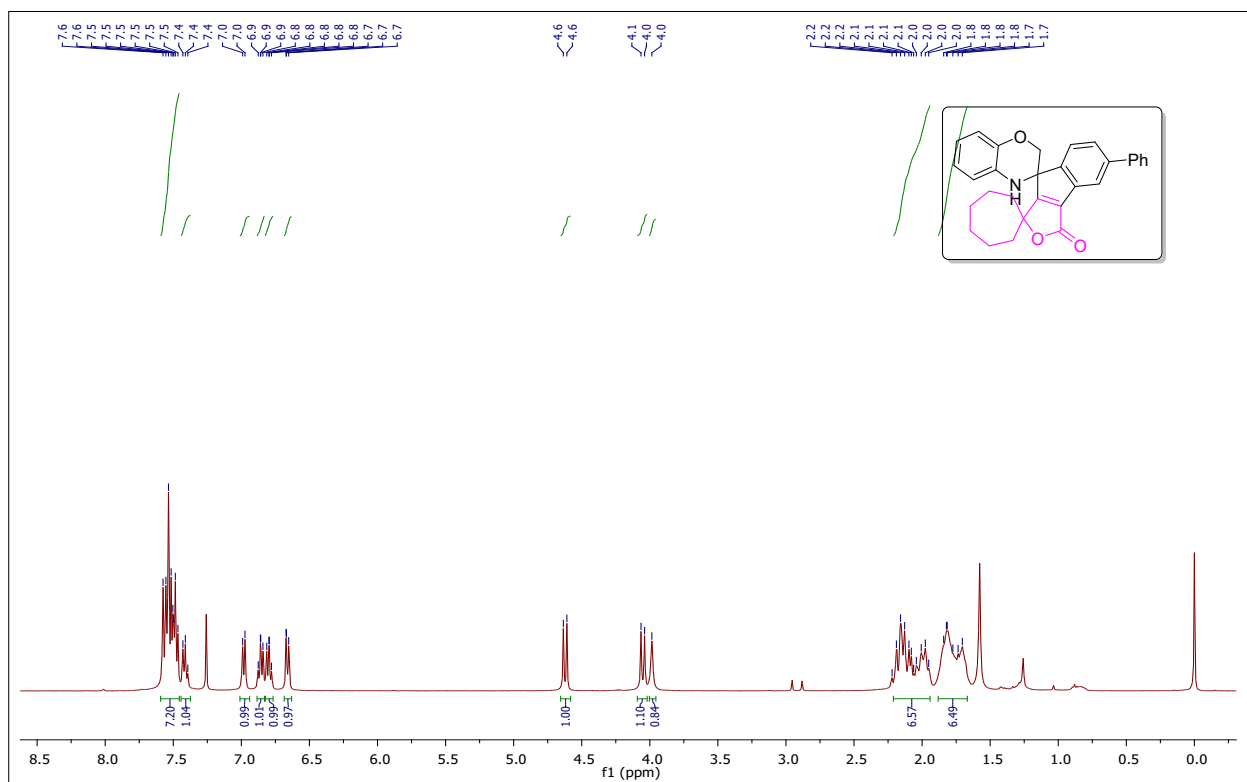

**$^{13}\text{C}\{^1\text{H}\}$  NMR (100 MHz,  $\text{CDCl}_3$ ) spectrum of compound **5m****

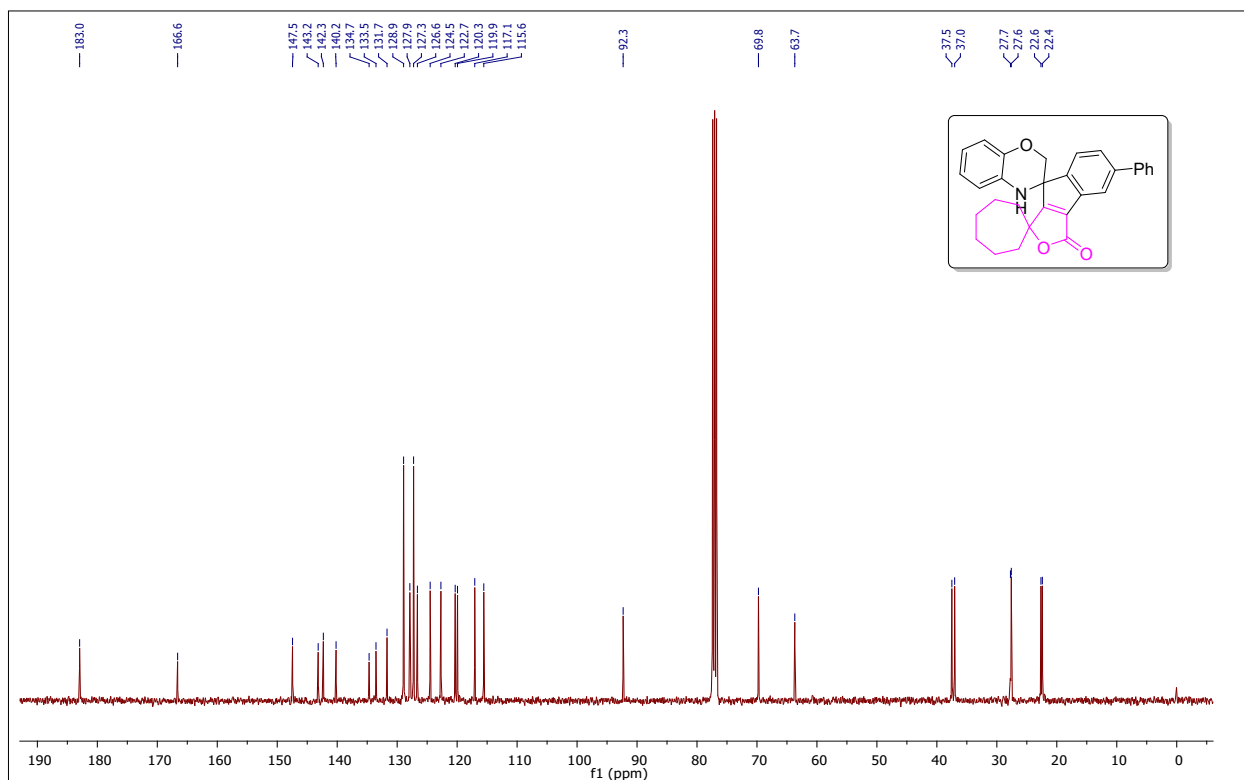

**$^1\text{H}$  NMR (400 MHz,  $\text{CDCl}_3$ ) spectrum of compound **5n****

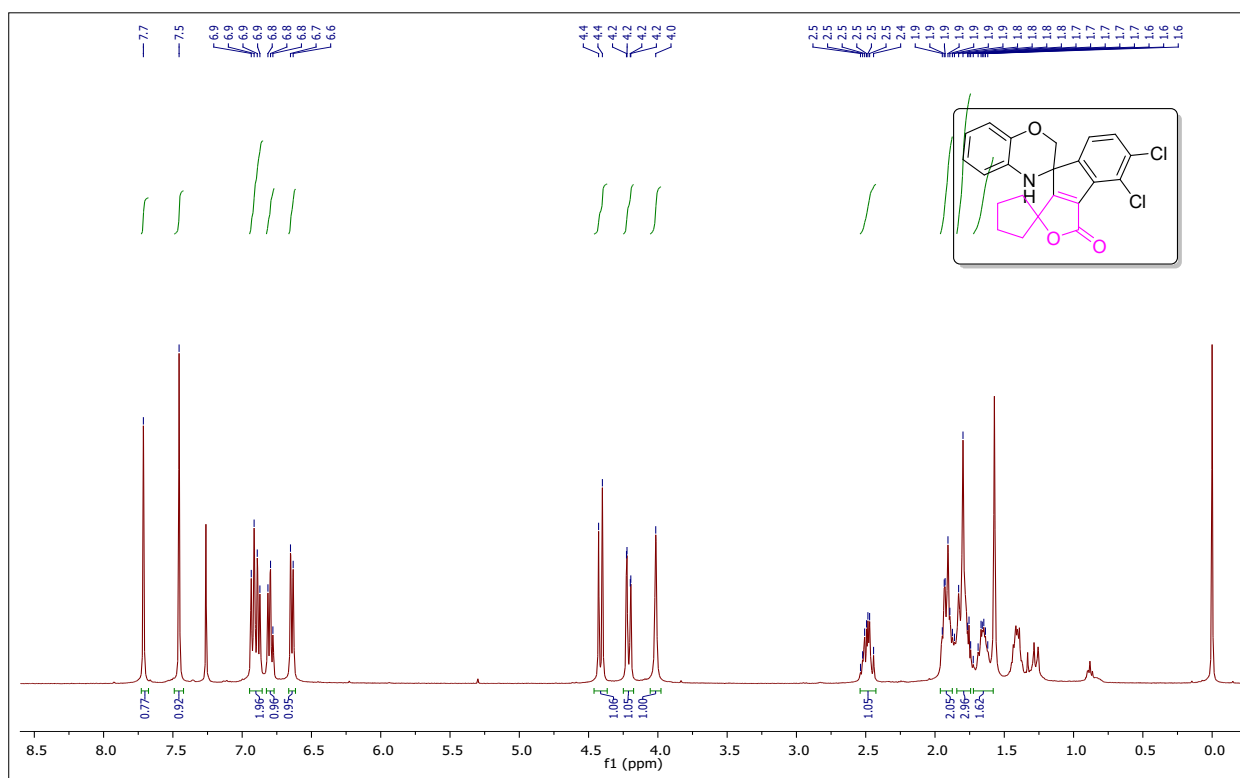

**$^{13}\text{C}\{^1\text{H}\}$  NMR (100MHz,  $\text{CDCl}_3$ ) spectrum of compound **5n****

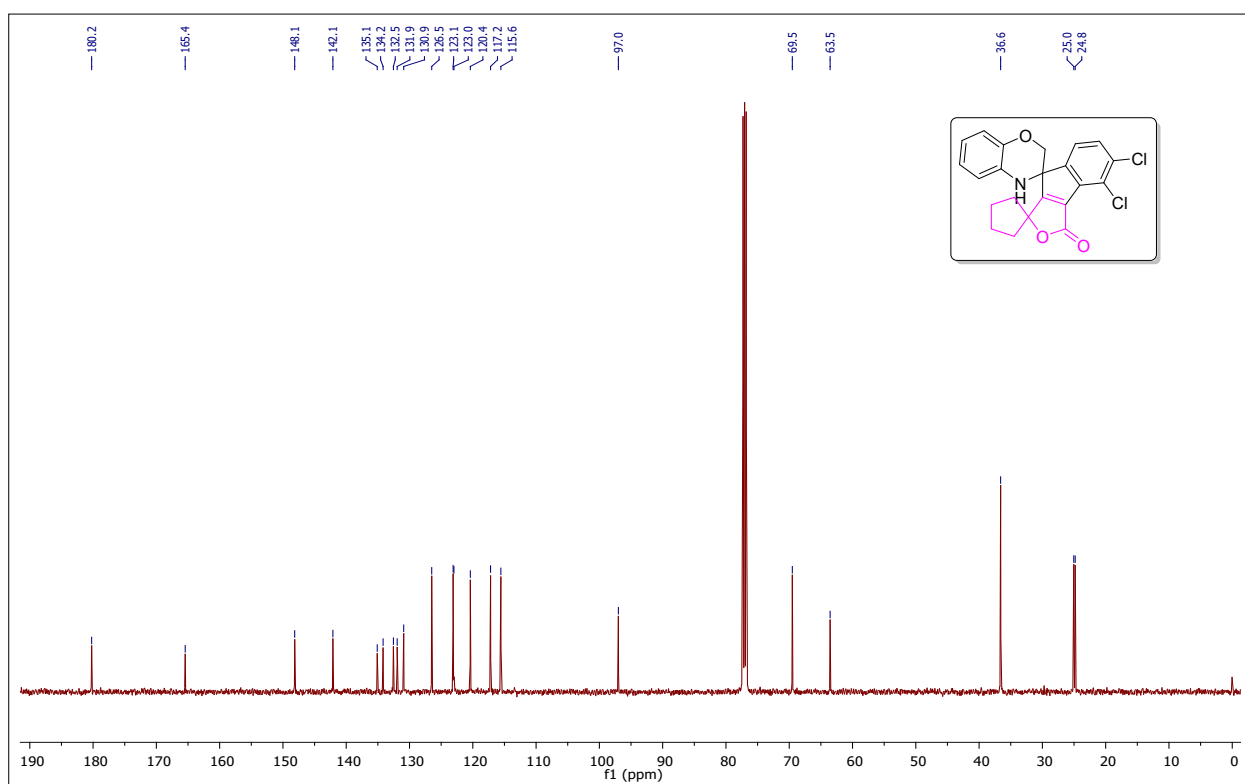

**$^1\text{H}$  NMR (400MHz,  $\text{CDCl}_3$ ) spectrum of compound **50****

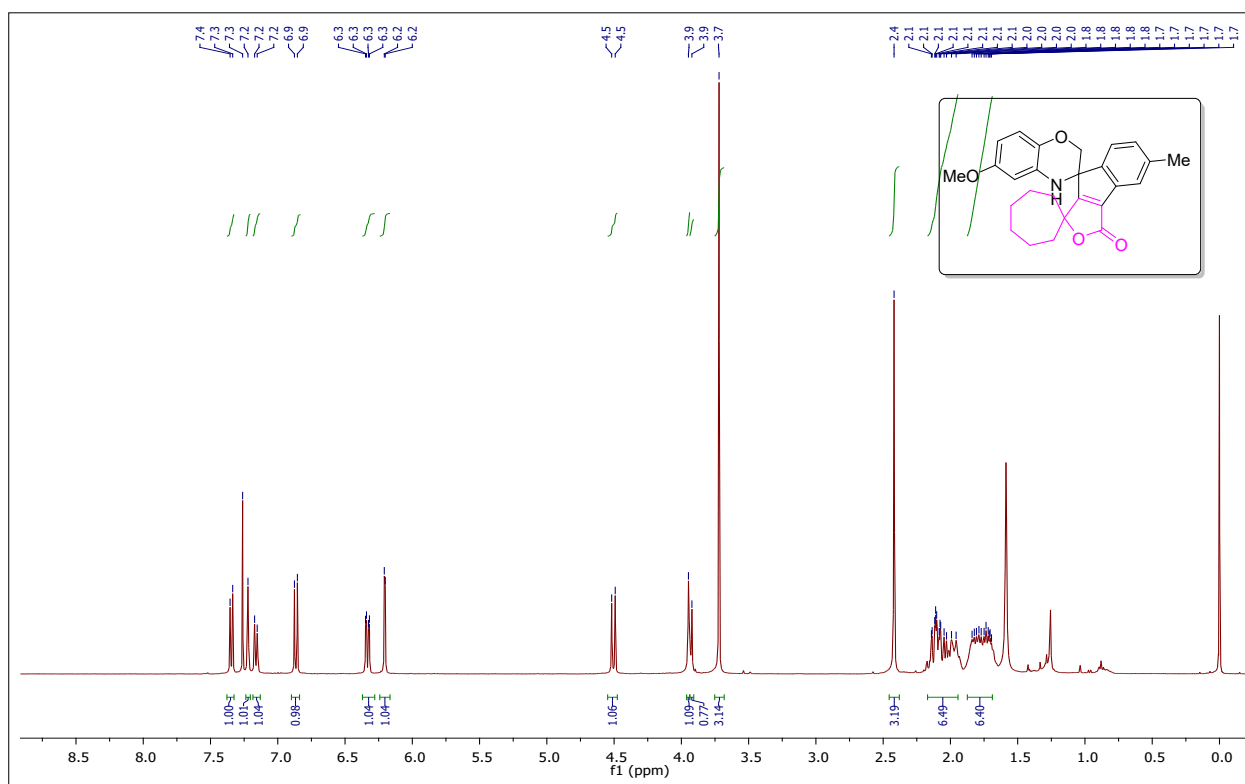

**$^{13}\text{C}\{^1\text{H}\}$  NMR (100MHz,  $\text{CDCl}_3$ ) spectrum of compound **50****

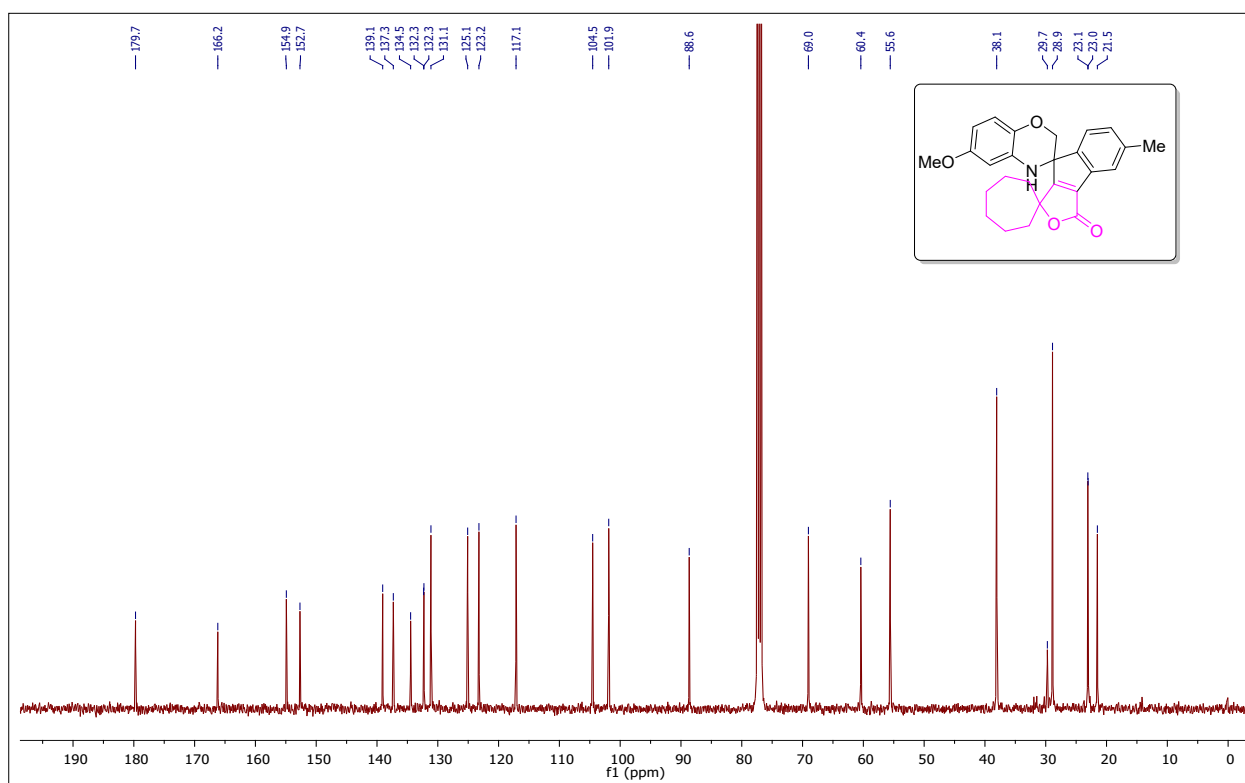

**<sup>1</sup>H NMR (400MHz, CDCl<sub>3</sub>) spectrum of compound 5p**

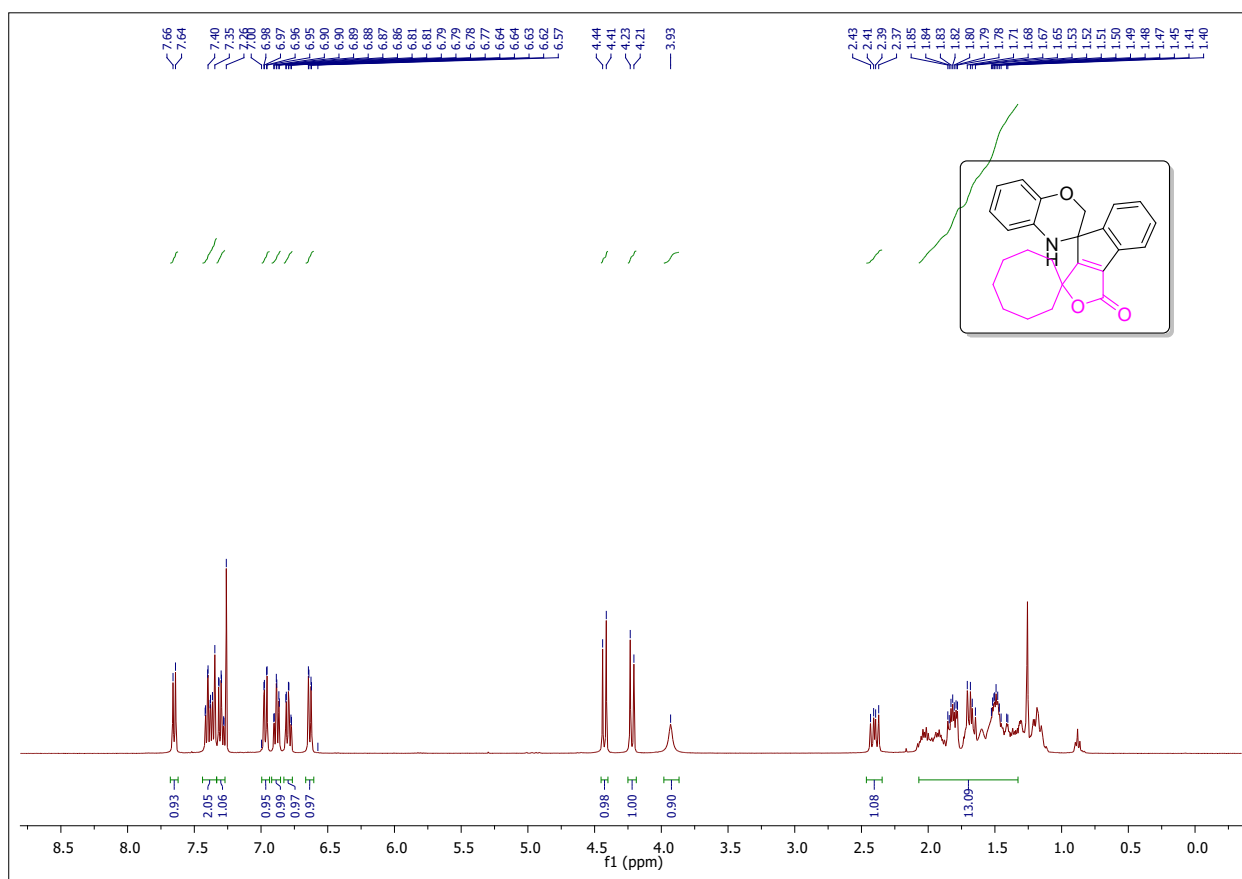

**<sup>13</sup>C{<sup>1</sup>H} NMR (100MHz, CDCl<sub>3</sub>) spectrum of compound 5p**

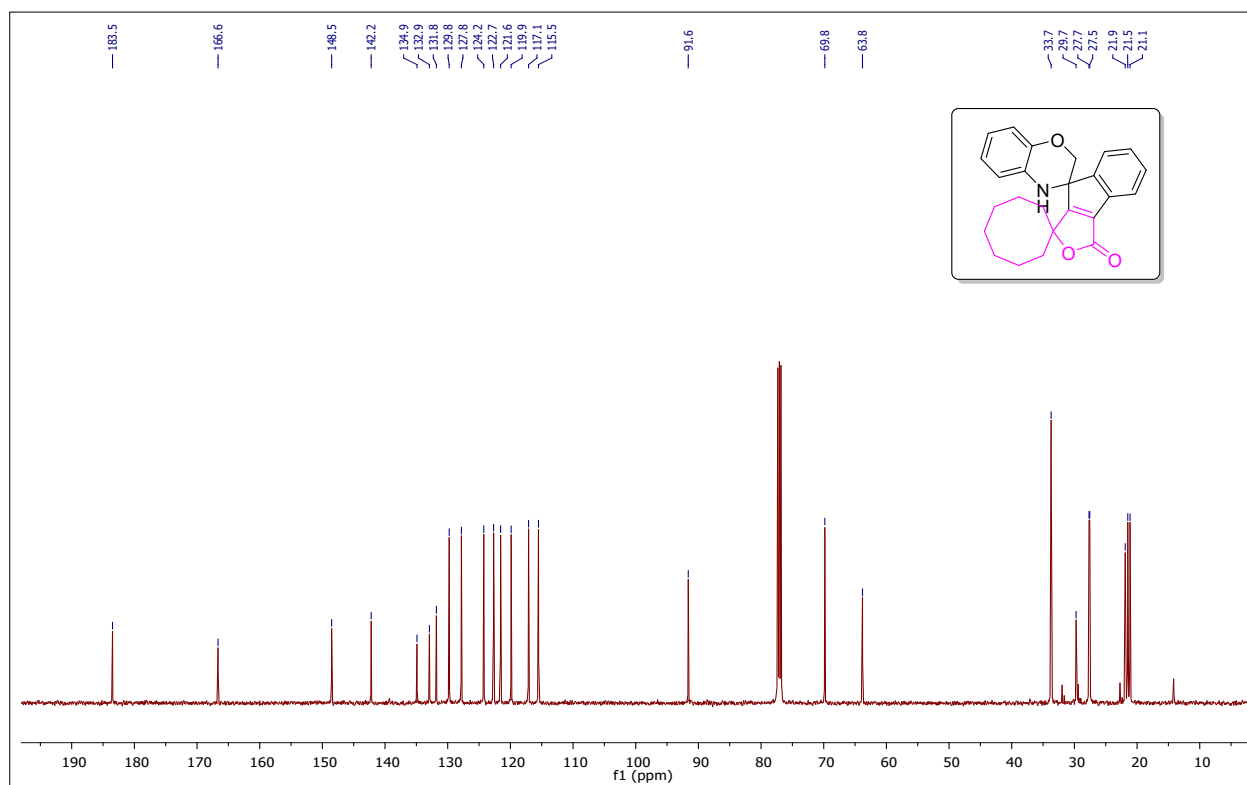



**<sup>1</sup>H NMR (400MHz,CDCl<sub>3</sub>) spectrum of compound3a'**

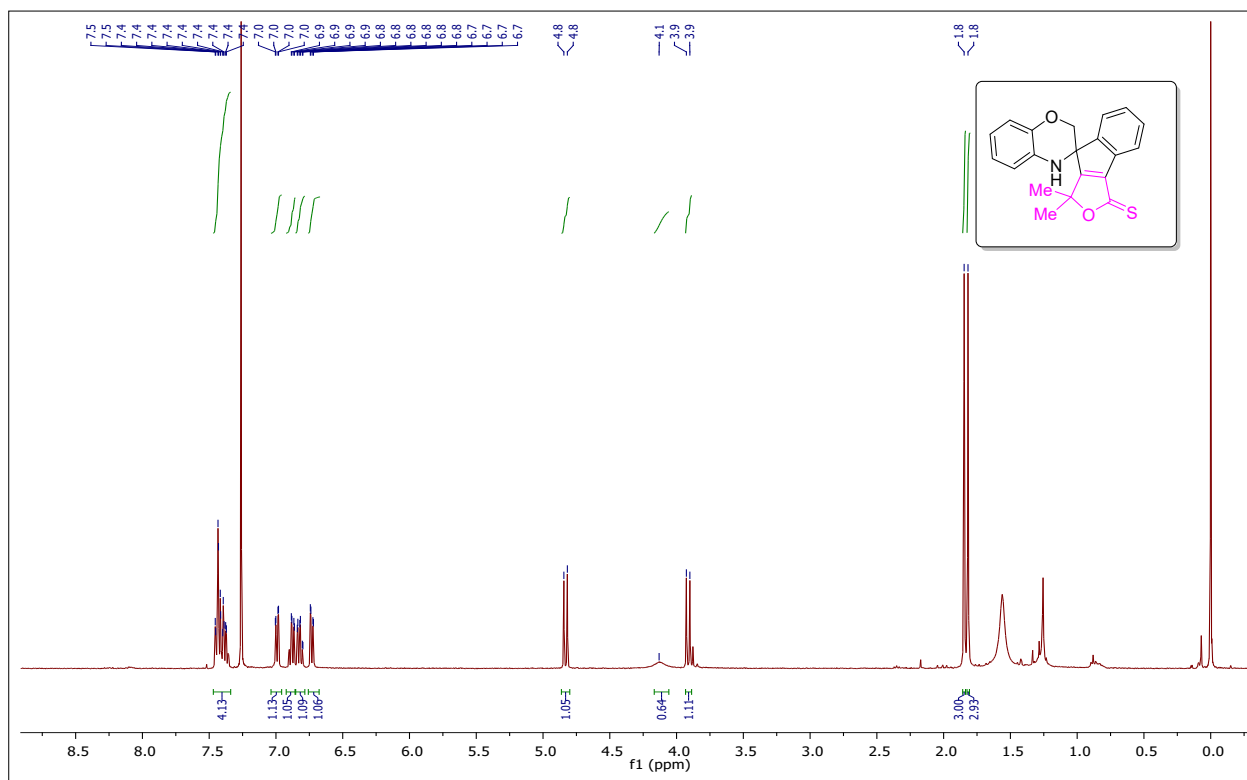

**<sup>13</sup>C{<sup>1</sup>H} NMR 100MHz, CDCl<sub>3</sub>) spectrum of compound 3a'**

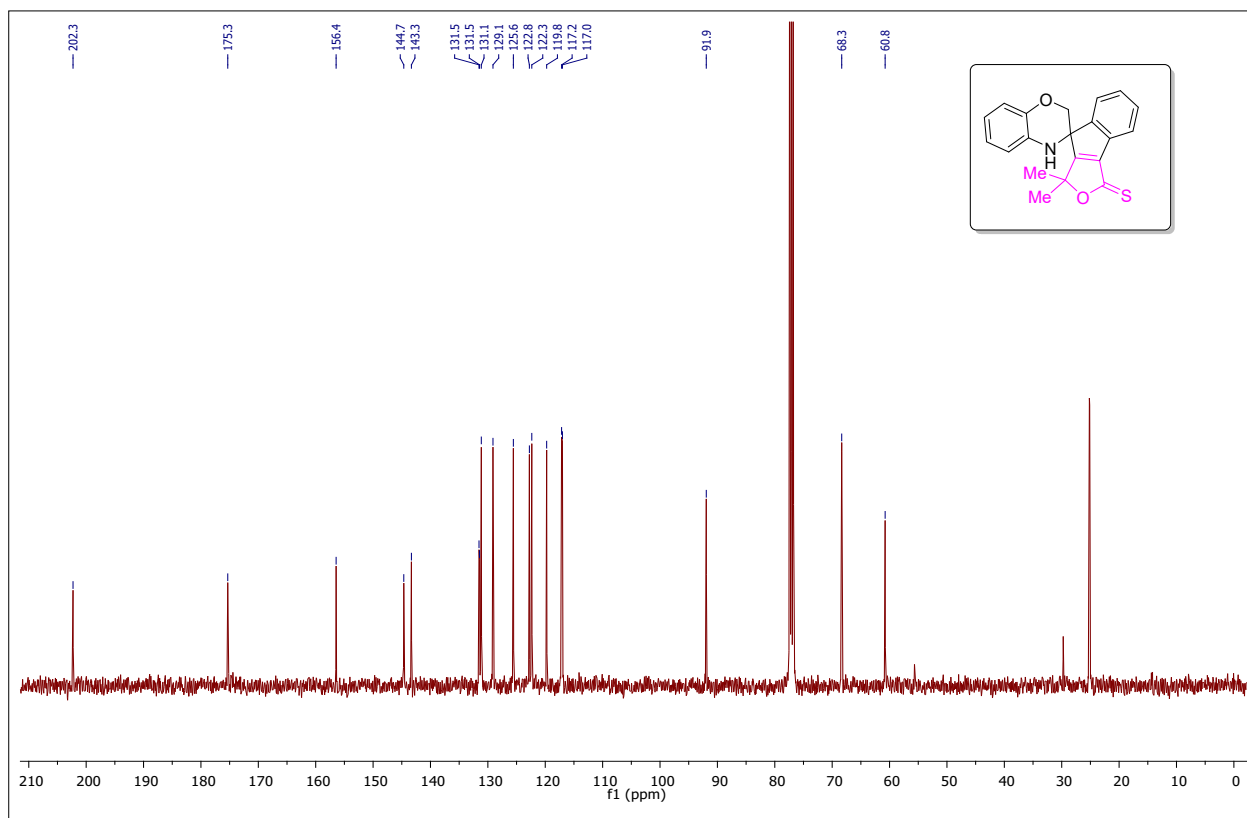

**<sup>1</sup>H NMR (400MHz, CDCl<sub>3</sub>) spectrum of compound 5q**

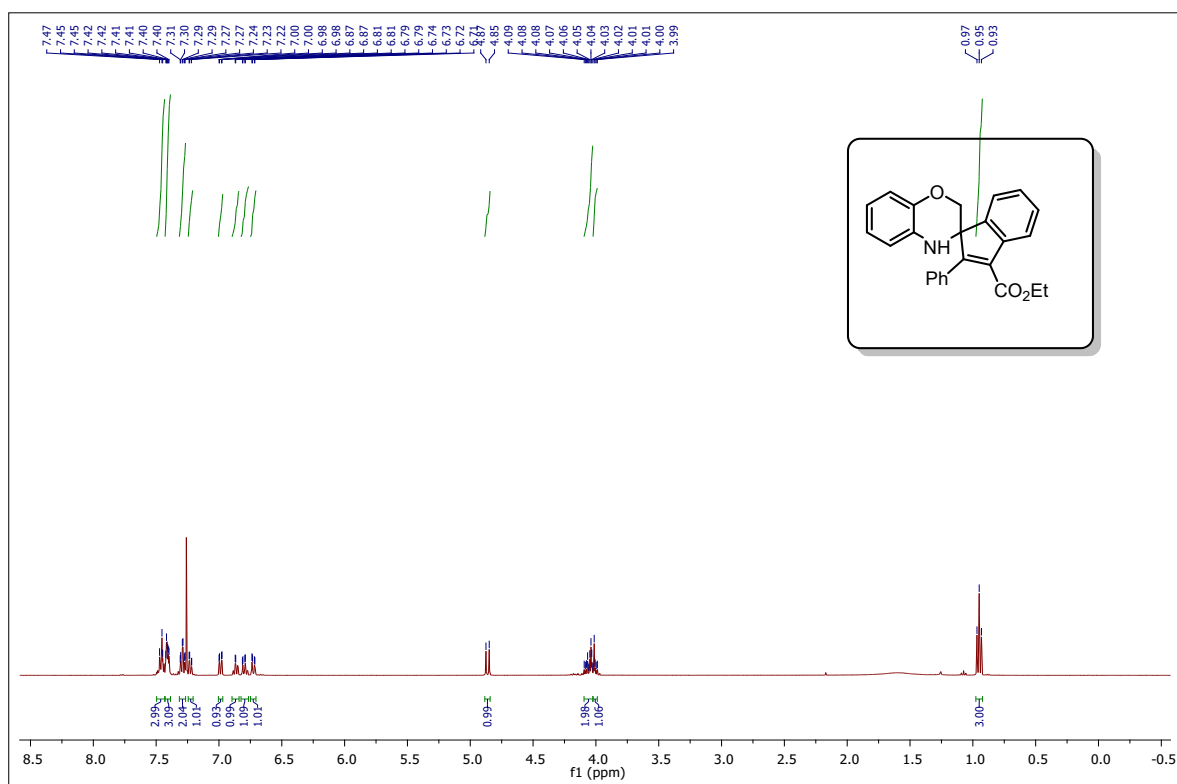

**<sup>1</sup>H NMR (400MHz, CDCl<sub>3</sub>) spectrum of compound 5r**

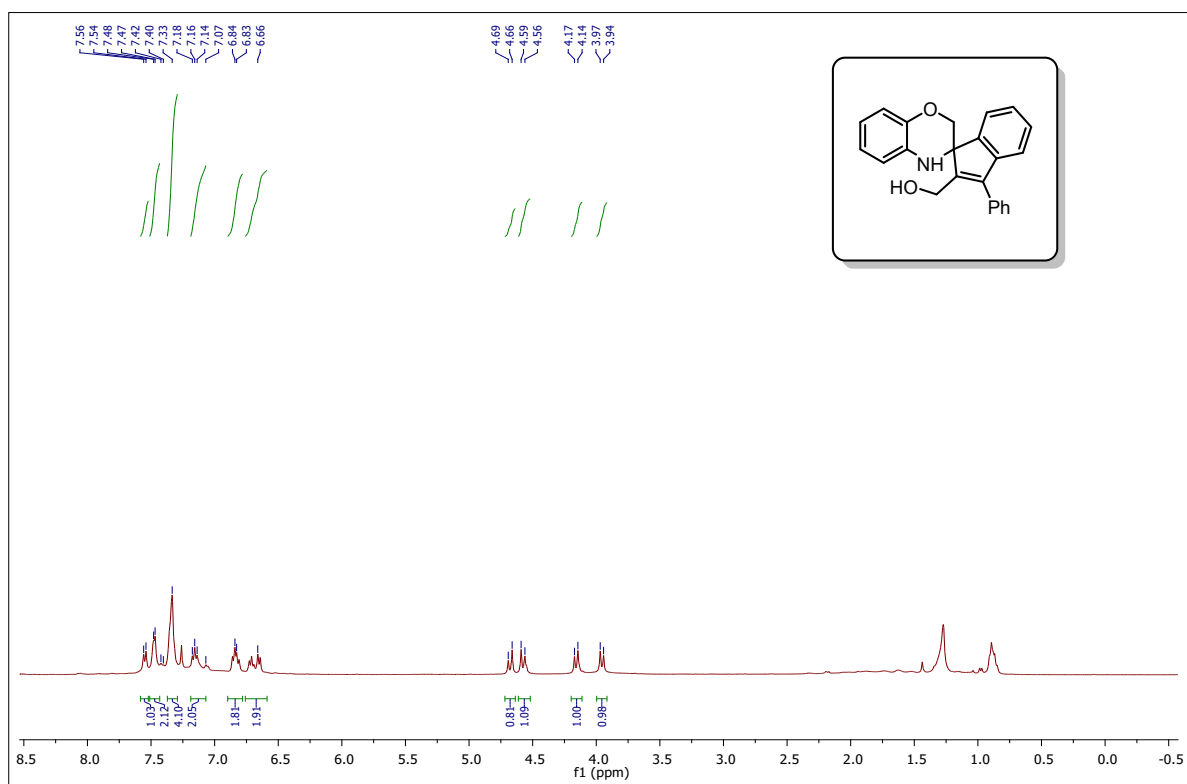

## Control experiments using D<sub>2</sub>O:

### (a) H/D exchange experiment:

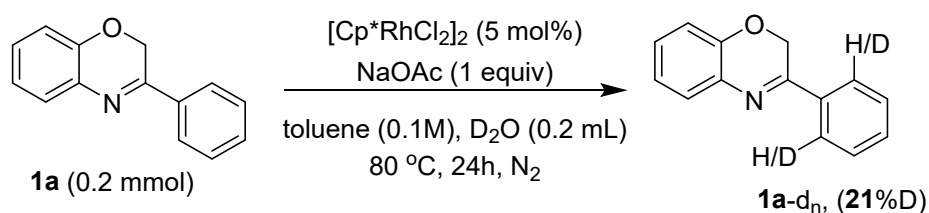

An oven dried 10 mL schlenk tube was charged with 3-phenyl-2H-benzo[b][1,4]oxazine (**1a**) (41.8 mg, 0.2 mmol), sodium acetate (16.4 mg, 1.0 equiv) and catalyst [Cp\*RhCl<sub>2</sub>]<sub>2</sub> (6.2 mg, 5 mol %). The tube was evacuated and backfilled with nitrogen and to it was added toluene (2.0 mL, 0.1 M) and D<sub>2</sub>O (0.2 mL) under nitrogen atmosphere. The reaction mixture was degassed and backfilled with nitrogen 3 times. It was then closed with teflon-lined cap and heated at 80 °C (oil bath temperature) while stirring for 24 h. The reaction mixture was filtered through a short pad of celite, the solvent was removed under reduced pressure and the crude reaction mixture was directly purified through column chromatography on silica gel using petroleum ether/ ethyl acetate (9:1). The deuterium incorporation (21%) was determined by <sup>1</sup>H NMR spectroscopy

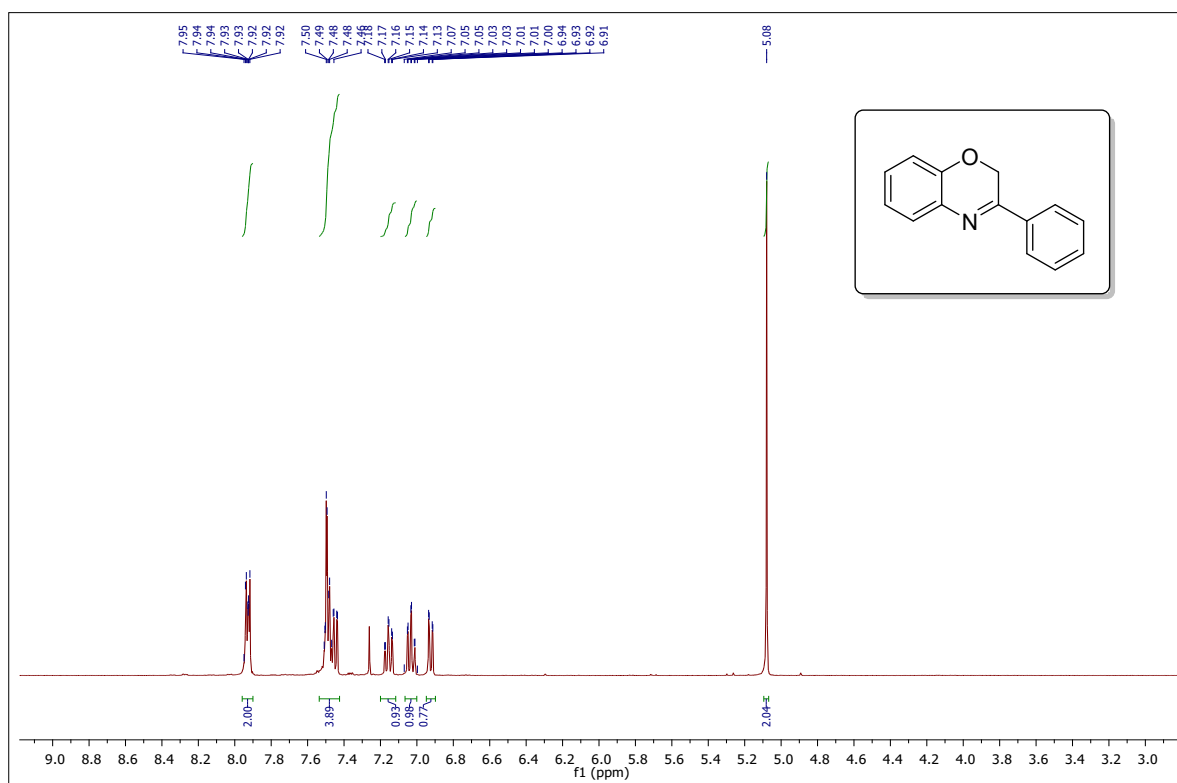



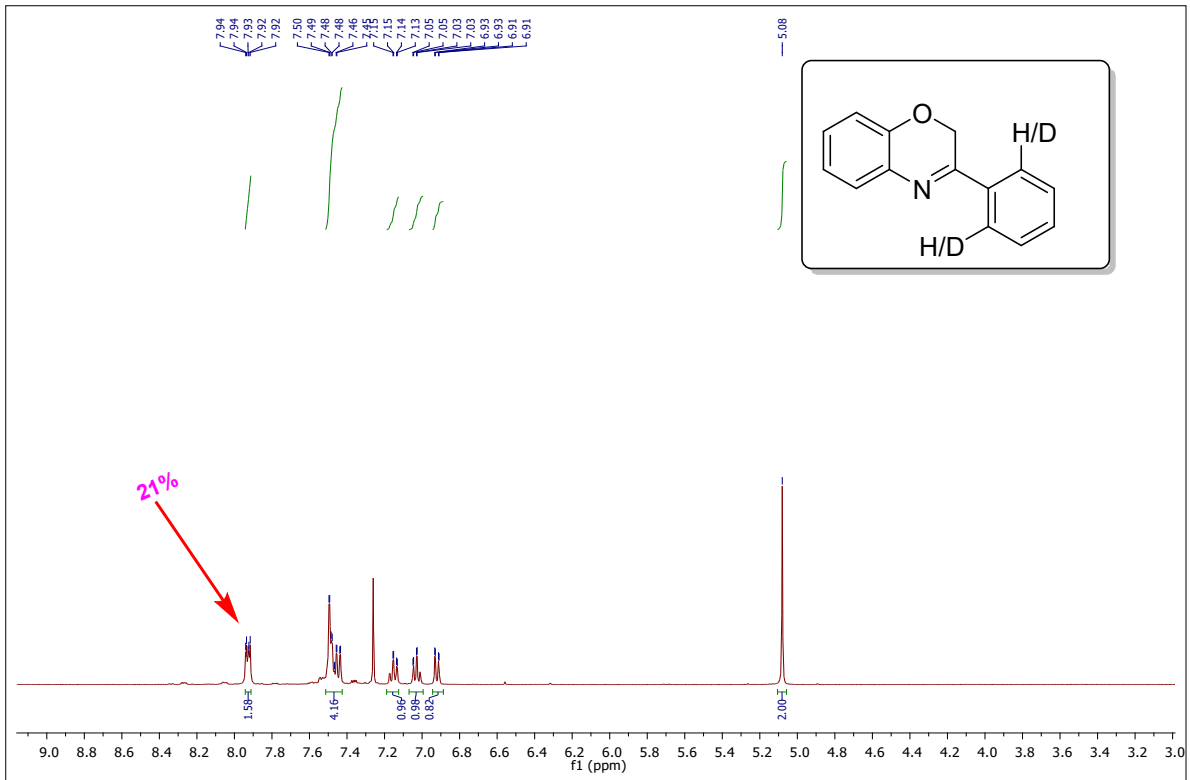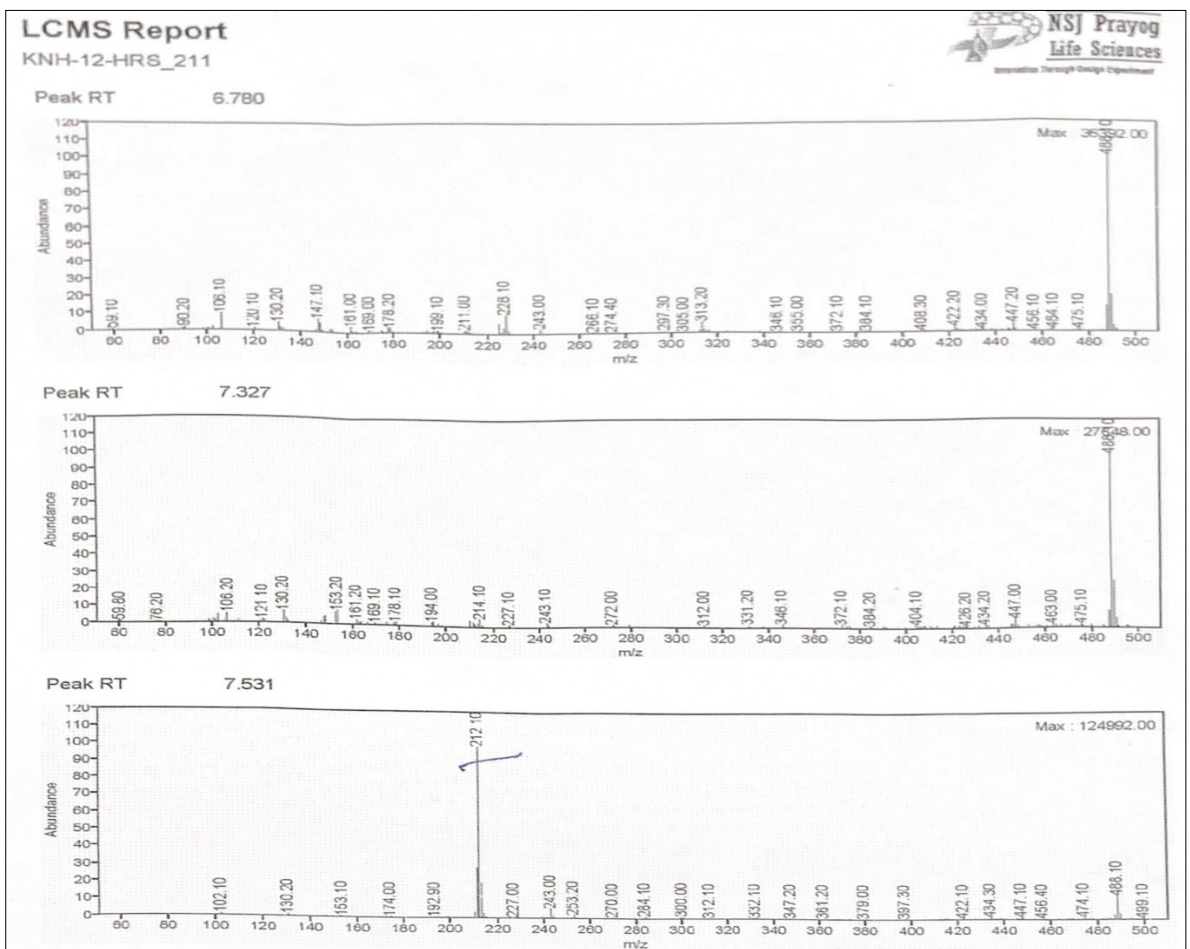

### (b) Competitive experiment between substituted benzoxazines:

An oven dried 10 mL schlenk tube was charged with 3-phenyl-2H-benzo[b][1,4]oxazine (100 mg, 0.5 mmol) (**3c**&**3d**) and ethyl propiolate **2a** (90 mg, 0.6 mmol) in TFE were added  $[\text{RhCp}^*\text{Cl}_2]_2$  (5 mol %), sodium acetate (40 mg, 0.5 mmol) and then the reaction mixture was stirred at 80 °C (oil bath) for overnight under air balloon. After completion of the reaction (as monitored by TLC), TFE was evaporated, water was added, and the contents were extracted with ethyl acetate (2×10 mL). The organic layer was evaporated and the residue was purified by column chromatography ( $R_f = 0.50$ ) ( $\text{SiO}_2$ , EtOAc:Hexane, 1:99) to give the mixture of products **3c** and **3d** in 1:5 ratio, which was determined by  $^1\text{H}$  NMR spectroscopy.

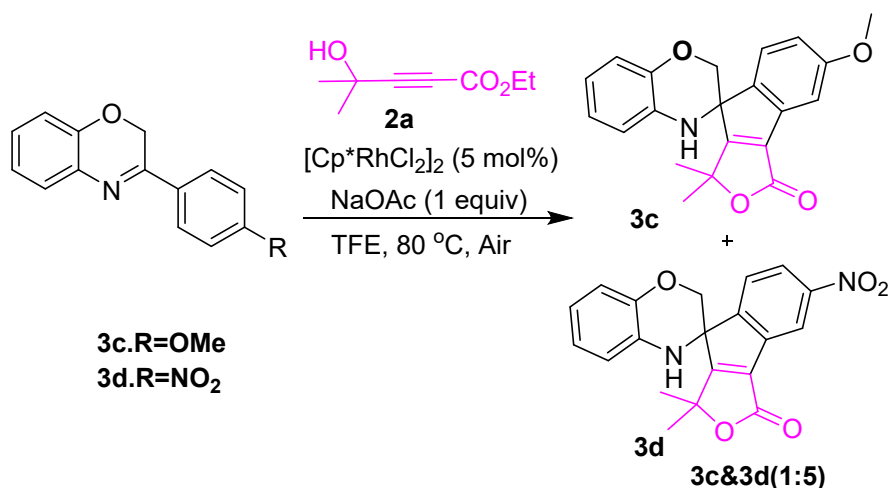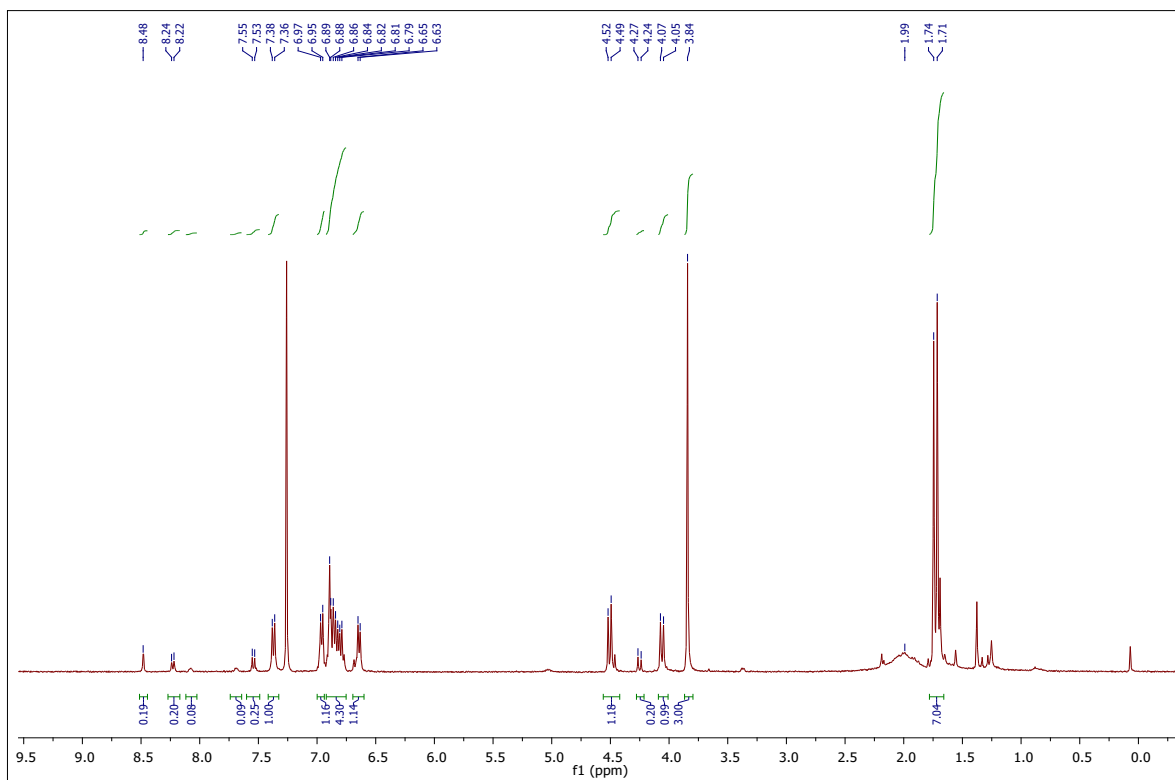

## 5.X-ray crystallography

X-ray data for the compound was collected at room temperature on a Bruker D8 QUEST instrument with an I $\mu$ S Mo microsource ( $\lambda = 0.7107 \text{ \AA}$ ) and a PHOTON-III detector. The raw data frames were reduced and corrected for absorption effects using the Bruker Apex 3 software suite programs [1]. The structure was solved using intrinsic phasing method [2] and further refined with the SHELXL [2] program and expanded using Fourier techniques. Anisotropic displacement parameters were included for all non-hydrogen atoms. The absolute configuration was confirmed by unambiguous refinement of the absolute structure parameter [3]. All C bound H atoms were positioned geometrically and treated as riding on their parent C atoms [C-H = 0.93-0.97  $\text{\AA}$ , and  $U_{\text{iso}}(\text{H}) = 1.5U_{\text{eq}}(\text{C})$  for methyl H or  $1.2U_{\text{eq}}(\text{C})$  for other H atoms].

### Crystal structure determination of 3f

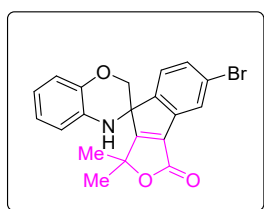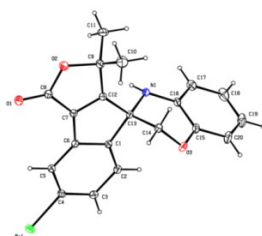

**Crystal Data** for  $\text{C}_{20}\text{H}_{16}\text{NO}_3\text{Br}$  ( $M = 398.25 \text{ g/mol}$ ): orthorhombic, space group  $P2_12_12_1$  (no. 19),  $a = 9.5218(11) \text{ \AA}$ ,  $b = 10.0470(12) \text{ \AA}$ ,  $c = 18.931(3) \text{ \AA}$ ,  $V = 1811.1(4) \text{ \AA}^3$ ,  $Z = 4$ ,  $T = 294.15 \text{ K}$ ,  $\mu(\text{MoK}\alpha) = 2.287 \text{ mm}^{-1}$ ,  $D_{\text{calc}} = 1.461 \text{ g/cm}^3$ , 14903 reflections measured ( $4.59^\circ \leq 2\theta \leq 54.998^\circ$ ), 4082 unique ( $R_{\text{int}} = 0.0368$ ,  $R_{\text{sigma}} = 0.0488$ ) which were used in all calculations. The final  $R_1$  was 0.0280 ( $I > 2\sigma(I)$ ) and  $wR_2$  was 0.0726 (all data). **CCDC 2247998** deposition numbers contain the supplementary crystallographic data for this paper which can be obtained free of charge at <https://www.ccdc.cam.ac.uk/structures/>

1. Bruker (2016). APEX3, SAINT and SADABS. Bruker AXS, Inc., Madison, Wisconsin, USA.
2. Sheldrick G. M. (2015). Acta Crystallogr C71: 3-8.
3. Flack, H. D. & Bernardinelli, G. (2000). J. Appl. Cryst. 33, 1143–1148.
